# Supplementary material for: Inhibition of 2-AG hydrolysis differentially regulates blood brain barrier permeability after injury
Source: J Neuroinflammation. 2018 May 14;15:142. doi: 10.1186/s12974-018-1166-9 (PMC5952841; doi:10.1186/s12974-018-1166-9)
Supplement: Supplementary file 2 — Table S2. Gene ontology analysis. Gene ontology analysis was performed using the DAVID bioinformatics tools. The enriched functional annotation clusters are listed along with p values for LPS vs Sham upregulated genes, LPS vs Sham downregulated genes, and CPD-4645 vs vehicle downregulated genes. (XLSX 157 kb) [file 12974_2018_1166_MOESM2_ESM.xlsx]

## Sheet: LPS_vs_Sham_UP_GO_BP
Annotation Cluster 1	Enrichment Score: 26.866137375911244
Category	Term	Count	%	PValue	Genes	List Total	Pop Hits	Pop Total	Fold Enrichment	Bonferroni	Benjamini	FDR
GOTERM_BP_FAT	GO:0006952~defense response	89	13.2638	2.42524e-40	ADORA3, TLR1, CRP, PGLYRP1, TLR2, H2-D1, TLR6, TLR7, C1QC, TGFB1, TAPBP, B2M, C1RA, NOD2, MYD88, CD44, SAA2, SAA1, HAMP, CFH, IL1B, NOS2, LBP, MX1, MX2, SPN, H2-K1, NFKBIZ, IL18RAP, C5AR1, NGP, C4B, NCF1, CAMP, SAA3, IFI47, SERPING1, CLIC1, NLRP3, CD163, C1QA, C1QB, SERPINA3N, IL20RB, CXCL1, IFIH1, IL1R1, TNF, CXCL5, FGR, C3, CCR1, CXCL9, RSAD2, ITGB2, NLRP1B, CCL7, SLC11A1, TNFRSF1A, TNFRSF1B, I…	499	448	13588	5.40962	6.03158e-37	3.01579e-37	4.27584e-37
GOTERM_BP_FAT	GO:0006954~inflammatory response	55	8.19672	2.29343e-29	ADORA3, CRP, TLR1, TLR2, TLR6, C1QC, TLR7, TGFB1, C1RA, NOD2, MYD88, SAA2, CD44, SAA1, CFH, IL1B, NOS2, LBP, NFKBIZ, C4B, NCF1, SAA3, SERPING1, NLRP3, CD163, C1QA, C1QB, SERPINA3N, IL20RB, CXCL1, TNF, CXCL5, C3, CCR1, CXCL9, ITGB2, CCL7, TNFRSF1A, SLC11A1, TNFRSF1B, IL23A, PYCARD, C2, B4GALT1, SELP, TLR13, FCGR1, STAT3, FCGR3, ORM1, CCL12, STAB1, CXCL13, ALOX5, CD14	499	225	13588	6.65633	5.70376e-26	1.90125e-26	4.04345e-26
GOTERM_BP_FAT	GO:0009611~response to wounding	64	9.538	7.61898e-27	ADORA3, F13A1, TLR1, CRP, TLR2, TLR6, C1QC, TLR7, TGFB1, C1RA, NOD2, MYD88, SAA2, CD44, SAA1, CFH, IL1B, NOS2, LBP, NFKBIZ, C4B, NCF1, SAA3, SERPING1, NLRP3, PLAUR, CD163, C1QA, C1QB, SERPINA3N, IL20RB, PROS1, LCP1, CXCL1, TNF, CXCL5, C3, CCR1, CXCL9, ITGB2, CCL7, SLC11A1, TNFRSF1A, TNFRSF1B, IL23A, FGA, PROCR, PYCARD, C2, B4GALT1, SELP, PTPN6, PLEK, TLR13, FCGR1, STAT3, FCGR3, ORM1, CCL12, VWF, …	499	347	13588	5.02233	1.89484e-23	4.7371e-24	1.34327e-23
GOTERM_BP_FAT	GO:0002526~acute inflammatory response	23	3.42772	8.09679e-14	B4GALT1, ADORA3, C3, C4B, CRP, SAA3, SERPING1, C1QC, FCGR1, STAT3, CD163, FCGR3, C1QA, ORM1, C1QB, C1RA, SERPINA3N, SAA2, SAA1, CFH, IL1B, C2, LBP	499	81	13588	7.73211	2.01286e-10	1.18403e-11	1.42697e-10
Annotation Cluster 2	Enrichment Score: 10.1571049668405
Category	Term	Count	%	PValue	Genes	List Total	Pop Hits	Pop Total	Fold Enrichment	Bonferroni	Benjamini	FDR
GOTERM_BP_FAT	GO:0001817~regulation of cytokine production	29	4.32191	1.20125e-13	TNF, LRRC32, STAT5A, TLR1, TLR2, TLR6, TLR7, IRAK3, SLC11A1, NOD2, MYD88, PYCARD, IL1B, FCER1G, BCL3, LBP, SRGN, SPN, ICOSL, CEBPB, CD40, H2-Q6, NLRP3, H2-Q7, FCGR3, INHBB, DDX58, IL20RB, IRF1, CD14	499	139	13588	5.68118	2.98754e-10	1.65974e-11	2.11786e-10
GOTERM_BP_FAT	GO:0001819~positive regulation of cytokine production	17	2.53353	4.80506e-10	TNF, TLR2, CD40, NLRP3, H2-Q6, H2-Q7, TLR7, DDX58, SLC11A1, NOD2, MYD88, IL20RB, PYCARD, FCER1G, IL1B, BCL3, LBP, CD14	499	62	13588	7.46642	1.19502e-06	3.98339e-08	8.47159e-07
GOTERM_BP_FAT	GO:0051240~positive regulation of multicellular organismal process	25	3.72578	5.85267e-09	B4GALT1, ADORA3, TNF, IKZF1, STAT5A, CSF1, TLR2, CD40, NLRP3, H2-Q6, TLR7, H2-Q7, ADA, DDX58, SLC11A1, NOD2, MYD88, IL20RB, AGT, PYCARD, MC4R, FCER1G, IL1B, BCL3, LBP, CD14	499	163	13588	4.17645	1.45555e-05	3.6389e-07	1.03186e-05
Annotation Cluster 3	Enrichment Score: 9.422542174190182
Category	Term	Count	%	PValue	Genes	List Total	Pop Hits	Pop Total	Fold Enrichment	Bonferroni	Benjamini	FDR
GOTERM_BP_FAT	GO:0045087~innate immune response	30	4.47094	7.98562e-18	IL1R1, IFIH1, C3, TLR1, TLR2, TLR6, TLR7, C1QC, TGFB1, C1RA, SLC11A1, NOD2, IL23A, MYD88, CFH, LBP, C2, MX1, MX2, DHX58, PTPN6, IRGM1, IL18RAP, C4B, TLR13, SERPING1, FCGR1, C1QA, DDX58, C1QB	499	107	13588	7.63471	1.98602e-14	3.31004e-15	1.40791e-14
GOTERM_BP_FAT	GO:0002252~immune effector process	32	4.769	1.20705e-17	ADORA3, C3, RSAD2, TLR7, C1QC, C1RA, SLC11A1, NOD2, MYD88, CFH, FCER1G, BCL3, FAS, LBP, C2, PTPRC, PTPN6, ICAM1, ICOSL, C4B, NCF1, MYO1F, SERPING1, H2-Q6, NLRP3, FCGR1, H2-Q7, FCGR3, C1QA, TRAF3IP2, C1QB, FCGR2B, IRF7	499	126	13588	6.91567	3.00194e-14	4.28849e-15	2.1281e-14
GOTERM_BP_FAT	GO:0002250~adaptive immune response	25	3.72578	1.62662e-15	ICAM1, ICOSL, C3, C4B, RELB, SERPING1, NFKB2, TLR6, FCGR1, C1QC, FCGR3, C1QA, C1QB, SLC11A1, C1RA, NOD2, IL18BP, MYD88, FCGR2B, IRF7, GADD45G, FCER1G, BCL3, C2, FAS	499	84	13588	8.1043	4.14169e-12	4.14113e-13	2.93099e-12
GOTERM_BP_FAT	GO:0002460~adaptive immune response based on somatic recombination of immune receptors built from immunoglobulin superfamily domains	25	3.72578	1.62662e-15	ICAM1, ICOSL, C3, C4B, RELB, SERPING1, NFKB2, TLR6, FCGR1, C1QC, FCGR3, C1QA, C1QB, SLC11A1, C1RA, NOD2, IL18BP, MYD88, FCGR2B, IRF7, GADD45G, FCER1G, BCL3, C2, FAS	499	84	13588	8.1043	4.14169e-12	4.14113e-13	2.93099e-12
GOTERM_BP_FAT	GO:0048584~positive regulation of response to stimulus	35	5.2161	5.67554e-15	TNF, ADORA3, C3, STAT5A, TLR2, NFKBIA, C1QC, PNP, ADA, B2M, C1RA, SLC11A1, TNFRSF1A, NOD2, MYD88, TAP2, TGM2, CFH, IL1B, FCER1G, LBP, C2, H2-K1, PTPRC, PTPN6, LYN, C4B, SERPING1, H2-Q6, FCGR1, H2-Q7, FCGR3, C1QA, C1QB, BCL2A1D, FABP4	499	186	13588	5.12401	1.40817e-11	1.17351e-12	9.9809e-12
GOTERM_BP_FAT	GO:0050778~positive regulation of immune response	29	4.32191	6.73579e-14	C3, STAT5A, TLR2, NFKBIA, C1QC, PNP, ADA, B2M, C1RA, SLC11A1, NOD2, MYD88, TAP2, CFH, FCER1G, C2, LBP, H2-K1, PTPN6, PTPRC, LYN, C4B, SERPING1, H2-Q6, H2-Q7, FCGR1, FCGR3, C1QA, C1QB, BCL2A1D	499	136	13588	5.8065	1.676e-10	1.11734e-11	1.18816e-10
GOTERM_BP_FAT	GO:0002443~leukocyte mediated immunity	24	3.57675	7.0511e-14	PTPN6, ICAM1, ICOSL, ADORA3, C3, C4B, NCF1, MYO1F, SERPING1, FCGR1, C1QC, FCGR3, C1QA, C1QB, SLC11A1, C1RA, NOD2, MYD88, FCGR2B, IRF7, FCER1G, BCL3, C2, FAS	499	89	13588	7.34305	1.75331e-10	1.09582e-11	1.24289e-10
GOTERM_BP_FAT	GO:0002526~acute inflammatory response	23	3.42772	8.09679e-14	B4GALT1, ADORA3, C3, C4B, CRP, SAA3, SERPING1, C1QC, FCGR1, STAT3, CD163, FCGR3, C1QA, ORM1, C1QB, C1RA, SERPINA3N, SAA2, SAA1, CFH, IL1B, C2, LBP	499	81	13588	7.73211	2.01286e-10	1.18403e-11	1.42697e-10
GOTERM_BP_FAT	GO:0002449~lymphocyte mediated immunity	21	3.12966	2.12511e-12	PTPN6, ICAM1, ICOSL, C3, C4B, SERPING1, C1QC, FCGR1, FCGR3, C1QA, C1QB, SLC11A1, C1RA, NOD2, MYD88, FCGR2B, IRF7, FCER1G, BCL3, C2, FAS	499	76	13588	7.52421	5.28507e-09	2.29786e-10	3.74664e-09
GOTERM_BP_FAT	GO:0019724~B cell mediated immunity	18	2.68256	1.08645e-10	ICOSL, C3, C4B, SERPING1, C1QC, FCGR1, FCGR3, C1QA, C1QB, C1RA, NOD2, MYD88, FCGR2B, IRF7, FCER1G, BCL3, C2, FAS	499	65	13588	7.54074	2.70201e-07	1.00074e-08	1.91548e-07
GOTERM_BP_FAT	GO:0016064~immunoglobulin mediated immune response	17	2.53353	6.22614e-10	ICOSL, C3, C4B, SERPING1, C1QC, FCGR1, FCGR3, C1QA, C1QB, C1RA, NOD2, MYD88, FCGR2B, IRF7, FCER1G, BCL3, C2	499	63	13588	7.3479	1.54844e-06	4.99497e-08	1.0977e-06
GOTERM_BP_FAT	GO:0002253~activation of immune response	18	2.68256	1.13495e-08	PTPN6, PTPRC, LYN, C3, C4B, TLR2, NFKBIA, SERPING1, C1QC, C1QA, C1QB, C1RA, BCL2A1D, NOD2, MYD88, CFH, FCER1G, C2	499	86	13588	5.6994	2.82257e-05	6.56421e-07	2.00098e-05
GOTERM_BP_FAT	GO:0006959~humoral immune response	13	1.93741	4.33764e-07	TNF, C4B, C3, SERPING1, C1QC, C1QA, TRAF3IP2, C1QB, C1RA, AIRE, CFH, BCL3, C2	499	54	13588	6.55548	0.00107819	1.76846e-05	0.000764749
GOTERM_BP_FAT	GO:0002455~humoral immune response mediated by circulating immunoglobulin	9	1.34128	3.0219e-05	C1QA, C1QB, C1RA, C3, C4B, BCL3, SERPING1, C2, C1QC	499	35	13588	7.00212	0.0724009	0.000715512	0.0532644
GOTERM_BP_FAT	GO:0002541~activation of plasma proteins involved in acute inflammatory response	9	1.34128	3.76196e-05	C1QA, C1QB, C1RA, C3, C4B, CFH, SERPING1, C2, C1QC	499	36	13588	6.80762	0.0893181	0.000865937	0.0663048
GOTERM_BP_FAT	GO:0006956~complement activation	9	1.34128	3.76196e-05	C1QA, C1QB, C1RA, C3, C4B, CFH, SERPING1, C2, C1QC	499	36	13588	6.80762	0.0893181	0.000865937	0.0663048
GOTERM_BP_FAT	GO:0006958~complement activation, classical pathway	8	1.19225	8.32036e-05	C1QA, C1QB, C1RA, C3, C4B, SERPING1, C2, C1QC	499	30	13588	7.26146	0.186928	0.00178234	0.146591
GOTERM_BP_FAT	GO:0051605~protein maturation by peptide bond cleavage	10	1.49031	0.000570839	C1QA, C1QB, C1RA, C3, C4B, CFH, SERPING1, C2, C1QC, SRGN	499	65	13588	4.1893	0.758306	0.00954926	1.00166
GOTERM_BP_FAT	GO:0016485~protein processing	11	1.63934	0.00165127	C1QA, C1QB, C1RA, C3, C4B, CFH, SERPING1, C2, MYC, C1QC, SRGN	499	90	13588	3.32817	0.983594	0.0225752	2.87165
GOTERM_BP_FAT	GO:0051604~protein maturation	11	1.63934	0.00268018	C1QA, C1QB, C1RA, C3, C4B, CFH, SERPING1, C2, MYC, C1QC, SRGN	499	96	13588	3.12016	0.998737	0.0338198	4.62145
Annotation Cluster 4	Enrichment Score: 8.045465829305957
Category	Term	Count	%	PValue	Genes	List Total	Pop Hits	Pop Total	Fold Enrichment	Bonferroni	Benjamini	FDR
GOTERM_BP_FAT	GO:0001817~regulation of cytokine production	29	4.32191	1.20125e-13	TNF, LRRC32, STAT5A, TLR1, TLR2, TLR6, TLR7, IRAK3, SLC11A1, NOD2, MYD88, PYCARD, IL1B, FCER1G, BCL3, LBP, SRGN, SPN, ICOSL, CEBPB, CD40, H2-Q6, NLRP3, H2-Q7, FCGR3, INHBB, DDX58, IL20RB, IRF1, CD14	499	139	13588	5.68118	2.98754e-10	1.65974e-11	2.11786e-10
GOTERM_BP_FAT	GO:0042108~positive regulation of cytokine biosynthetic process	11	1.63934	2.04378e-06	ICOSL, MYD88, STAT5A, TLR1, IRF1, BCL3, IL1B, TLR6, TLR7, SPN, FCGR3	499	42	13588	7.13179	0.00506998	6.68777e-05	0.00360323
GOTERM_BP_FAT	GO:0042035~regulation of cytokine biosynthetic process	13	1.93741	2.97534e-06	INHBB, ICOSL, MYD88, CEBPB, STAT5A, TLR1, IRF1, BCL3, IL1B, TLR6, TLR7, SPN, FCGR3	499	64	13588	5.53119	0.00737237	9.36625e-05	0.00524557
Annotation Cluster 5	Enrichment Score: 6.856303688178387
Category	Term	Count	%	PValue	Genes	List Total	Pop Hits	Pop Total	Fold Enrichment	Bonferroni	Benjamini	FDR
GOTERM_BP_FAT	GO:0042330~taxis	24	3.57675	7.0038e-12	C3AR1, C5AR1, CXCL5, S100A8, CCR1, S100A9, CCL9, CXCR2, ITGB2, FPR2, CCL7, ITGAM, FCGR3, CCL6, CCL12, RAC2, CXCL13, CXCL16, ECSCR, FCER1G, IL1B, LBP, CMTM3, CYR61	499	109	13588	5.9957	1.74186e-08	6.96742e-10	1.23482e-08
GOTERM_BP_FAT	GO:0006935~chemotaxis	24	3.57675	7.0038e-12	C3AR1, C5AR1, CXCL5, S100A8, CCR1, S100A9, CCL9, CXCR2, ITGB2, FPR2, CCL7, ITGAM, FCGR3, CCL6, CCL12, RAC2, CXCL13, CXCL16, ECSCR, FCER1G, IL1B, LBP, CMTM3, CYR61	499	109	13588	5.9957	1.74186e-08	6.96742e-10	1.23482e-08
GOTERM_BP_FAT	GO:0030595~leukocyte chemotaxis	9	1.34128	3.69155e-06	C5AR1, CCR1, S100A9, FCER1G, IL1B, ITGB2, LBP, ITGAM, FCGR3	499	27	13588	9.07682	0.00913887	0.000110607	0.00650821
GOTERM_BP_FAT	GO:0060326~cell chemotaxis	9	1.34128	3.69155e-06	C5AR1, CCR1, S100A9, FCER1G, IL1B, ITGB2, LBP, ITGAM, FCGR3	499	27	13588	9.07682	0.00913887	0.000110607	0.00650821
GOTERM_BP_FAT	GO:0007626~locomotory behavior	24	3.57675	2.35688e-05	C3AR1, C5AR1, CXCL5, S100A8, CCR1, S100A9, CCL9, CXCR2, ITGB2, FPR2, CCL7, ITGAM, FCGR3, CCL6, CCL12, RAC2, CXCL13, CXCL16, ECSCR, FCER1G, IL1B, LBP, CMTM3, CYR61	499	239	13588	2.73444	0.0569315	0.000580192	0.0415451
GOTERM_BP_FAT	GO:0007610~behavior	30	4.47094	0.000462121	C3AR1, CXCL5, S100A8, CCR1, S100A9, CCL9, CXCR2, ITGB2, FPR2, CCL7, ITGAM, CCL6, RAC2, AGT, FCER1G, IL1B, LBP, RUNX1, CYR61, C5AR1, STAT3, FCGR3, OSM, CCL12, CXCL13, ITGA5, CXCL16, ECSCR, MC4R, CMTM3	499	405	13588	2.01707	0.683224	0.00811976	0.811622
Annotation Cluster 6	Enrichment Score: 6.809368745025544
Category	Term	Count	%	PValue	Genes	List Total	Pop Hits	Pop Total	Fold Enrichment	Bonferroni	Benjamini	FDR
GOTERM_BP_FAT	GO:0001775~cell activation	41	6.11028	1.3617e-15	ITGAL, SBNO2, ADORA3, TNF, ELF4, STAT5A, TLR1, ITGB2, NFKB2, ITGAM, TGFB1, ADA, TIMP1, SLC11A1, IL23A, FGA, AGT, BCL3, FCER1G, FAS, LBP, SPN, FYB, PTPRC, ICOSL, IKZF1, PLEK, RELB, MYO1F, CD40, WAS, VAV1, FCGR3, VWF, BCL2A1D, CD86, FCGR2B, GADD45G, IRF1, LCP1, LCP2	499	246	13588	4.53841	3.31335e-12	4.14113e-13	2.35367e-12
GOTERM_BP_FAT	GO:0045321~leukocyte activation	34	5.06706	4.05424e-12	ITGAL, SBNO2, ADORA3, ELF4, STAT5A, TLR1, ITGB2, ITGAM, TGFB1, ADA, SLC11A1, IL23A, FCER1G, BCL3, FAS, LBP, SPN, FYB, PTPRC, ICOSL, IKZF1, RELB, MYO1F, CD40, WAS, VAV1, FCGR3, BCL2A1D, CD86, FCGR2B, GADD45G, IRF1, LCP1, LCP2	499	219	13588	4.22756	1.00828e-08	4.20117e-10	7.14779e-09
GOTERM_BP_FAT	GO:0042110~T cell activation	22	3.27869	1.16656e-09	PTPRC, ITGAL, ICOSL, IKZF1, ELF4, STAT5A, RELB, ITGB2, WAS, VAV1, TGFB1, ITGAM, SLC11A1, BCL2A1D, CD86, IL23A, GADD45G, IRF1, BCL3, FAS, LCP1, SPN	499	116	13588	5.1644	2.90122e-06	8.79159e-08	2.05671e-06
GOTERM_BP_FAT	GO:0002520~immune system development	31	4.61997	4.29079e-07	CSF3, TNF, CCR1, STAT5A, TIPARP, NFKB2, TGFB1, ADA, TIMP1, CASP8, BCL3, FAS, RUNX1, SPN, CEBPA, PTPRC, ICOSL, LTBR, LYN, IKZF1, HCLS1, RELB, VAV1, PLSCR1, BCL2A1D, CXCL13, IRF8, GADD45G, IRF1, CD300LF, JAK3	499	295	13588	2.86151	0.00106655	1.77852e-05	0.000756489
GOTERM_BP_FAT	GO:0048534~hemopoietic or lymphoid organ development	30	4.47094	4.92419e-07	CSF3, TNF, CCR1, STAT5A, TIPARP, NFKB2, TGFB1, ADA, TIMP1, CASP8, BCL3, FAS, RUNX1, SPN, CEBPA, PTPRC, LTBR, LYN, IKZF1, HCLS1, RELB, VAV1, PLSCR1, BCL2A1D, CXCL13, IRF8, GADD45G, IRF1, CD300LF, JAK3	499	281	13588	2.90717	0.0012239	1.94386e-05	0.000868159
GOTERM_BP_FAT	GO:0046649~lymphocyte activation	24	3.57675	5.24188e-07	PTPRC, ITGAL, ICOSL, IKZF1, ELF4, STAT5A, RELB, ITGB2, CD40, WAS, VAV1, ADA, TGFB1, ITGAM, SLC11A1, BCL2A1D, CD86, IL23A, GADD45G, IRF1, BCL3, FAS, LCP1, SPN	499	191	13588	3.42163	0.00130281	2.03694e-05	0.00092417
GOTERM_BP_FAT	GO:0030097~hemopoiesis	26	3.87481	5.72469e-06	CSF3, TNF, STAT5A, CCR1, TIPARP, ADA, TGFB1, TIMP1, CASP8, BCL3, FAS, RUNX1, SPN, CEBPA, PTPRC, IKZF1, LYN, HCLS1, RELB, VAV1, PLSCR1, BCL2A1D, IRF8, GADD45G, IRF1, CD300LF	499	251	13588	2.82069	0.0141365	0.000165537	0.0100925
GOTERM_BP_FAT	GO:0002521~leukocyte differentiation	18	2.68256	1.72436e-05	CSF3, CEBPA, PTPRC, TNF, IKZF1, STAT5A, RELB, VAV1, ADA, TGFB1, BCL2A1D, GADD45G, CASP8, IRF1, BCL3, CD300LF, FAS, SPN	499	142	13588	3.45175	0.0419787	0.000433091	0.0303972
GOTERM_BP_FAT	GO:0030217~T cell differentiation	12	1.78838	9.51554e-05	PTPRC, BCL2A1D, IKZF1, STAT5A, RELB, GADD45G, IRF1, BCL3, FAS, VAV1, TGFB1, SPN	499	76	13588	4.29955	0.210743	0.00202072	0.167632
GOTERM_BP_FAT	GO:0030099~myeloid cell differentiation	13	1.93741	0.000195536	CEBPA, CSF3, TNF, LYN, CCR1, HCLS1, RELB, TGFB1, TIMP1, PLSCR1, IRF8, CASP8, CD300LF	499	96	13588	3.68746	0.38513	0.00385244	0.34418
GOTERM_BP_FAT	GO:0030098~lymphocyte differentiation	13	1.93741	0.000954221	PTPRC, IKZF1, STAT5A, RELB, VAV1, TGFB1, ADA, BCL2A1D, GADD45G, IRF1, BCL3, FAS, SPN	499	114	13588	3.10523	0.906919	0.014373	1.66906
Annotation Cluster 7	Enrichment Score: 6.554259021020475
Category	Term	Count	%	PValue	Genes	List Total	Pop Hits	Pop Total	Fold Enrichment	Bonferroni	Benjamini	FDR
GOTERM_BP_FAT	GO:0008219~cell death	45	6.70641	9.35768e-08	TNF, NUAK2, IL19, PGLYRP1, TRIB3, CXCR2, PMAIP1, GLI2, TGFB1, IRAK3, TNFRSF1A, TNFRSF1B, CASP4, NAIP2, CASP8, NAIP5, PYCARD, ZC3H12A, FGL2, FAS, XAF1, FGF2, MYC, SRGN, CFLAR, LYZ2, SGK1, LTBR, NCF1, GZMA, GJB6, BIRC3, NLRP3, DDIT4, TRAF3IP2, OSM, TNFRSF10B, SERPINA3G, BCL2A1A, RIPK1, CSRNP1, GADD45G, RIPK3, TNFAIP3, EIF2AK2	499	507	13588	2.4169	0.000232698	4.39104e-06	0.000164981
GOTERM_BP_FAT	GO:0016265~death	45	6.70641	1.85834e-07	TNF, NUAK2, IL19, PGLYRP1, TRIB3, CXCR2, PMAIP1, GLI2, TGFB1, IRAK3, TNFRSF1A, TNFRSF1B, CASP4, NAIP2, CASP8, NAIP5, PYCARD, ZC3H12A, FGL2, FAS, XAF1, FGF2, MYC, SRGN, CFLAR, LYZ2, SGK1, LTBR, NCF1, GZMA, GJB6, BIRC3, NLRP3, DDIT4, TRAF3IP2, OSM, TNFRSF10B, SERPINA3G, BCL2A1A, RIPK1, CSRNP1, GADD45G, RIPK3, TNFAIP3, EIF2AK2	499	519	13588	2.36102	0.000462062	7.96839e-06	0.000327635
GOTERM_BP_FAT	GO:0006915~apoptosis	41	6.11028	4.73554e-07	TNF, NUAK2, IL19, PGLYRP1, TRIB3, CXCR2, PMAIP1, GLI2, IRAK3, TNFRSF1A, CASP4, NAIP2, CASP8, NAIP5, PYCARD, ZC3H12A, FAS, XAF1, FGF2, MYC, SRGN, CFLAR, SGK1, LTBR, NCF1, GZMA, GJB6, NLRP3, BIRC3, DDIT4, TRAF3IP2, OSM, TNFRSF10B, SERPINA3G, BCL2A1A, RIPK1, CSRNP1, GADD45G, RIPK3, TNFAIP3, EIF2AK2	499	465	13588	2.40097	0.00117704	1.89954e-05	0.000834899
GOTERM_BP_FAT	GO:0012501~programmed cell death	41	6.11028	7.36719e-07	TNF, NUAK2, IL19, PGLYRP1, TRIB3, CXCR2, PMAIP1, GLI2, IRAK3, TNFRSF1A, CASP4, NAIP2, CASP8, NAIP5, PYCARD, ZC3H12A, FAS, XAF1, FGF2, MYC, SRGN, CFLAR, SGK1, LTBR, NCF1, GZMA, GJB6, NLRP3, BIRC3, DDIT4, TRAF3IP2, OSM, TNFRSF10B, SERPINA3G, BCL2A1A, RIPK1, CSRNP1, GADD45G, RIPK3, TNFAIP3, EIF2AK2	499	473	13588	2.36036	0.00183054	2.69441e-05	0.00129887
Annotation Cluster 8	Enrichment Score: 5.508626141640275
Category	Term	Count	%	PValue	Genes	List Total	Pop Hits	Pop Total	Fold Enrichment	Bonferroni	Benjamini	FDR
GOTERM_BP_FAT	GO:0002684~positive regulation of immune system process	44	6.55738	5.06489e-21	ITGAL, ADORA3, C3, STAT5A, IL4RA, TLR2, NFKBIA, PNP, C1QC, TGFB1, ADA, B2M, IRAK3, C1RA, SLC11A1, NOD2, MYD88, TAP2, CFH, FCER1G, IL2RG, LBP, C2, SPN, H2-K1, PTPRC, PTPN6, SELP, ICOSL, LYN, IKZF1, C4B, SERPING1, CD40, H2-Q6, FCGR1, H2-Q7, FCGR3, C1QA, C1QB, CD38, BCL2A1D, CDKN1A, CD80, SELE	499	206	13588	5.81621	1.25964e-17	2.51928e-18	8.9297e-18
GOTERM_BP_FAT	GO:0045087~innate immune response	30	4.47094	7.98562e-18	IL1R1, IFIH1, C3, TLR1, TLR2, TLR6, TLR7, C1QC, TGFB1, C1RA, SLC11A1, NOD2, IL23A, MYD88, CFH, LBP, C2, MX1, MX2, DHX58, PTPN6, IRGM1, IL18RAP, C4B, TLR13, SERPING1, FCGR1, C1QA, DDX58, C1QB	499	107	13588	7.63471	1.98602e-14	3.31004e-15	1.40791e-14
GOTERM_BP_FAT	GO:0050727~regulation of inflammatory response	21	3.12966	4.55425e-15	ZFP36, SBNO2, ADORA3, C3, STAT5A, SERPING1, FCGR1, ADA, FCGR3, TNFRSF1A, TNFRSF1B, IL20RB, FCGR2B, AOAH, TGM2, CFH, FCER1G, FABP4, LBP, NT5E, SPN	499	57	13588	10.0323	1.13206e-11	1.02918e-12	8.02691e-12
GOTERM_BP_FAT	GO:0048584~positive regulation of response to stimulus	35	5.2161	5.67554e-15	TNF, ADORA3, C3, STAT5A, TLR2, NFKBIA, C1QC, PNP, ADA, B2M, C1RA, SLC11A1, TNFRSF1A, NOD2, MYD88, TAP2, TGM2, CFH, IL1B, FCER1G, LBP, C2, H2-K1, PTPRC, PTPN6, LYN, C4B, SERPING1, H2-Q6, FCGR1, H2-Q7, FCGR3, C1QA, C1QB, BCL2A1D, FABP4	499	186	13588	5.12401	1.40817e-11	1.17351e-12	9.9809e-12
GOTERM_BP_FAT	GO:0002819~regulation of adaptive immune response	20	2.98063	4.48399e-14	H2-K1, PTPN6, PTPRC, C3, IL4RA, CD40, H2-Q6, PNP, H2-Q7, FCGR1, ADA, TGFB1, FCGR3, B2M, SLC11A1, NOD2, IL20RB, FCGR2B, TAP2, FCER1G, SPN	499	56	13588	9.72516	1.11549e-10	8.58069e-12	7.90812e-11
GOTERM_BP_FAT	GO:0002822~regulation of adaptive immune response based on somatic recombination of immune receptors built from immunoglobulin superfamily domains	20	2.98063	4.48399e-14	H2-K1, PTPN6, PTPRC, C3, IL4RA, CD40, H2-Q6, PNP, H2-Q7, FCGR1, ADA, TGFB1, FCGR3, B2M, SLC11A1, NOD2, IL20RB, FCGR2B, TAP2, FCER1G, SPN	499	56	13588	9.72516	1.11549e-10	8.58069e-12	7.90812e-11
GOTERM_BP_FAT	GO:0002697~regulation of immune effector process	24	3.57675	5.4149e-14	H2-K1, PTPN6, PTPRC, TNF, ADORA3, C3, STAT5A, SERPING1, CD40, H2-Q6, FCGR1, PNP, H2-Q7, TGFB1, FCGR3, B2M, DDX58, NOD2, IL20RB, FCGR2B, TAP2, CFH, FCER1G, LBP, SPN	499	88	13588	7.42649	1.34743e-10	9.62452e-12	9.55236e-11
GOTERM_BP_FAT	GO:0050778~positive regulation of immune response	29	4.32191	6.73579e-14	C3, STAT5A, TLR2, NFKBIA, C1QC, PNP, ADA, B2M, C1RA, SLC11A1, NOD2, MYD88, TAP2, CFH, FCER1G, C2, LBP, H2-K1, PTPN6, PTPRC, LYN, C4B, SERPING1, H2-Q6, H2-Q7, FCGR1, FCGR3, C1QA, C1QB, BCL2A1D	499	136	13588	5.8065	1.676e-10	1.11734e-11	1.18816e-10
GOTERM_BP_FAT	GO:0032101~regulation of response to external stimulus	25	3.72578	2.41062e-13	ZFP36, SELP, SBNO2, ADORA3, PLEK, C3, STAT5A, SERPING1, FCGR1, ADA, FCGR3, ANXA2, TNFRSF1A, NOD2, TNFRSF1B, FCGR2B, IL20RB, AOAH, TGM2, CFH, FABP4, FCER1G, LBP, NT5E, SPN	499	103	13588	6.60934	5.9944e-10	2.9972e-11	4.24949e-10
GOTERM_BP_FAT	GO:0002703~regulation of leukocyte mediated immunity	19	2.83159	4.16403e-11	H2-K1, PTPN6, PTPRC, ADORA3, C3, STAT5A, CD40, H2-Q6, PNP, H2-Q7, FCGR1, TGFB1, FCGR3, B2M, NOD2, IL20RB, FCGR2B, TAP2, FCER1G, SPN	499	70	13588	7.39113	1.03559e-07	3.98305e-09	7.34142e-08
GOTERM_BP_FAT	GO:0002706~regulation of lymphocyte mediated immunity	18	2.68256	1.08645e-10	H2-K1, PTPN6, PTPRC, C3, STAT5A, CD40, H2-Q6, PNP, H2-Q7, FCGR1, TGFB1, FCGR3, B2M, NOD2, IL20RB, FCGR2B, TAP2, FCER1G, SPN	499	65	13588	7.54074	2.70201e-07	1.00074e-08	1.91548e-07
GOTERM_BP_FAT	GO:0019882~antigen processing and presentation	20	2.98063	2.56785e-10	H2-K1, ICAM1, H2-M5, RELB, H2-D1, IFI30, H2-Q6, H2-Q7, FCGR1, PSMB8, FCGR3, B2M, PSMB9, TAPBP, SLC11A1, PROCR, FCGR2B, C920025E04RIK, TAP2, FCER1G, H2-T23	499	87	13588	6.25988	6.38624e-07	2.2808e-08	4.52727e-07
GOTERM_BP_FAT	GO:0002824~positive regulation of adaptive immune response based on somatic recombination of immune receptors built from immunoglobulin superfamily domains	13	1.93741	1.35356e-09	H2-K1, PTPRC, SLC11A1, NOD2, C3, TAP2, FCER1G, H2-Q6, FCGR1, H2-Q7, PNP, ADA, FCGR3, B2M	499	34	13588	10.4116	3.36629e-06	9.90088e-08	2.3864e-06
GOTERM_BP_FAT	GO:0002821~positive regulation of adaptive immune response	13	1.93741	1.35356e-09	H2-K1, PTPRC, SLC11A1, NOD2, C3, TAP2, FCER1G, H2-Q6, FCGR1, H2-Q7, PNP, ADA, FCGR3, B2M	499	34	13588	10.4116	3.36629e-06	9.90088e-08	2.3864e-06
GOTERM_BP_FAT	GO:0048002~antigen processing and presentation of peptide antigen	13	1.93741	1.99192e-09	H2-K1, H2-D1, IFI30, H2-Q6, H2-Q7, FCGR1, TAPBP, B2M, FCGR3, SLC11A1, FCGR2B, TAP2, FCER1G, H2-T23	499	35	13588	10.1142	4.95388e-06	1.4154e-07	3.51186e-06
GOTERM_BP_FAT	GO:0002673~regulation of acute inflammatory response	10	1.49031	4.0218e-09	IL20RB, FCGR2B, C3, CFH, FCER1G, SERPING1, LBP, FCGR1, SPN, FCGR3	499	18	13588	15.128	1.00022e-05	2.63216e-07	7.09067e-06
GOTERM_BP_FAT	GO:0002699~positive regulation of immune effector process	14	2.08644	6.19213e-09	H2-K1, PTPRC, NOD2, ADORA3, C3, TAP2, STAT5A, FCER1G, LBP, H2-Q6, FCGR1, H2-Q7, PNP, FCGR3, B2M	499	46	13588	8.28753	1.53997e-05	3.75605e-07	1.09171e-05
GOTERM_BP_FAT	GO:0002253~activation of immune response	18	2.68256	1.13495e-08	PTPN6, PTPRC, LYN, C3, C4B, TLR2, NFKBIA, SERPING1, C1QC, C1QA, C1QB, C1RA, BCL2A1D, NOD2, MYD88, CFH, FCER1G, C2	499	86	13588	5.6994	2.82257e-05	6.56421e-07	2.00098e-05
GOTERM_BP_FAT	GO:0002474~antigen processing and presentation of peptide antigen via MHC class I	9	1.34128	5.59106e-08	H2-K1, H2-D1, FCER1G, H2-T23, H2-Q6, H2-Q7, FCGR1, FCGR3, B2M, TAPBP	499	17	13588	14.4161	0.00013904	2.89686e-06	9.85736e-05
GOTERM_BP_FAT	GO:0050729~positive regulation of inflammatory response	10	1.49031	8.88134e-08	TNFRSF1A, ADORA3, C3, STAT5A, TGM2, FCER1G, FABP4, LBP, FCGR1, FCGR3	499	24	13588	11.346	0.000220855	4.24766e-06	0.000156583
GOTERM_BP_FAT	GO:0031349~positive regulation of defense response	14	2.08644	1.02964e-07	ADORA3, C3, STAT5A, TLR2, NFKBIA, FCGR1, FCGR3, TNFRSF1A, NOD2, MYD88, TGM2, FABP4, FCER1G, LBP	499	57	13588	6.68818	0.00025604	4.65585e-06	0.000181532
GOTERM_BP_FAT	GO:0002708~positive regulation of lymphocyte mediated immunity	12	1.78838	1.26539e-07	H2-K1, PTPRC, NOD2, C3, TAP2, STAT5A, FCER1G, H2-Q6, H2-Q7, PNP, FCGR1, FCGR3, B2M	499	40	13588	8.16914	0.000314652	5.52107e-06	0.000223095
GOTERM_BP_FAT	GO:0002705~positive regulation of leukocyte mediated immunity	12	1.78838	1.26539e-07	H2-K1, PTPRC, NOD2, C3, TAP2, STAT5A, FCER1G, H2-Q6, H2-Q7, PNP, FCGR1, FCGR3, B2M	499	40	13588	8.16914	0.000314652	5.52107e-06	0.000223095
GOTERM_BP_FAT	GO:0002889~regulation of immunoglobulin mediated immune response	10	1.49031	7.98315e-07	PTPN6, PTPRC, NOD2, FCGR2B, C3, FCER1G, CD40, FCGR1, TGFB1, FCGR3	499	30	13588	9.07682	0.00198344	2.87736e-05	0.00140747
GOTERM_BP_FAT	GO:0002712~regulation of B cell mediated immunity	10	1.49031	7.98315e-07	PTPN6, PTPRC, NOD2, FCGR2B, C3, FCER1G, CD40, FCGR1, TGFB1, FCGR3	499	30	13588	9.07682	0.00198344	2.87736e-05	0.00140747
GOTERM_BP_FAT	GO:0002478~antigen processing and presentation of exogenous peptide antigen	9	1.34128	9.28104e-07	H2-K1, FCGR2B, TAP2, FCER1G, IFI30, FCGR1, FCGR3, B2M, TAPBP	499	23	13588	10.6554	0.00230553	3.29737e-05	0.00163629
GOTERM_BP_FAT	GO:0002709~regulation of T cell mediated immunity	8	1.19225	1.90697e-06	H2-K1, PTPRC, IL20RB, TAP2, H2-Q6, H2-Q7, PNP, SPN, B2M	499	18	13588	12.1024	0.00473141	6.32331e-05	0.00336204
GOTERM_BP_FAT	GO:0002864~regulation of acute inflammatory response to antigenic stimulus	7	1.04322	3.24041e-06	IL20RB, FCGR2B, C3, FCER1G, FCGR1, SPN, FCGR3	499	13	13588	14.6626	0.00802652	0.000100731	0.00571287
GOTERM_BP_FAT	GO:0002883~regulation of hypersensitivity	7	1.04322	3.24041e-06	IL20RB, FCGR2B, C3, FCER1G, FCGR1, SPN, FCGR3	499	13	13588	14.6626	0.00802652	0.000100731	0.00571287
GOTERM_BP_FAT	GO:0019884~antigen processing and presentation of exogenous antigen	9	1.34128	5.00357e-06	H2-K1, FCGR2B, TAP2, FCER1G, IFI30, FCGR1, FCGR3, B2M, TAPBP	499	28	13588	8.75265	0.0123668	0.000146388	0.00882121
GOTERM_BP_FAT	GO:0001916~positive regulation of T cell mediated cytotoxicity	6	0.894188	7.22813e-06	H2-K1, PTPRC, TAP2, H2-Q6, H2-Q7, PNP, B2M	499	9	13588	18.1536	0.0178158	0.000201962	0.0127428
GOTERM_BP_FAT	GO:0042590~antigen processing and presentation of exogenous peptide antigen via MHC class I	5	0.745156	8.65745e-06	H2-K1, FCER1G, FCGR1, FCGR3, TAPBP	499	5	13588	27.2305	0.021301	0.000234007	0.0152625
GOTERM_BP_FAT	GO:0032103~positive regulation of response to external stimulus	10	1.49031	8.80983e-06	TNFRSF1A, ADORA3, C3, STAT5A, TGM2, FCER1G, FABP4, LBP, FCGR1, FCGR3	499	39	13588	6.98217	0.0216719	0.000235565	0.0155311
GOTERM_BP_FAT	GO:0050764~regulation of phagocytosis	8	1.19225	2.30355e-05	SLC11A1, NOD2, FCGR2B, C3, FCER1G, FCGR1, TGFB1, FCGR3	499	25	13588	8.71375	0.0556798	0.000572736	0.0406052
GOTERM_BP_FAT	GO:0001914~regulation of T cell mediated cytotoxicity	6	0.894188	2.493e-05	H2-K1, PTPRC, TAP2, H2-Q6, H2-Q7, PNP, B2M	499	11	13588	14.853	0.0601187	0.000601777	0.0439439
GOTERM_BP_FAT	GO:0002861~regulation of inflammatory response to antigenic stimulus	7	1.04322	2.99675e-05	IL20RB, FCGR2B, C3, FCER1G, FCGR1, SPN, FCGR3	499	18	13588	10.5896	0.0718207	0.000716381	0.0528213
GOTERM_BP_FAT	GO:0002711~positive regulation of T cell mediated immunity	6	0.894188	6.53327e-05	H2-K1, PTPRC, TAP2, H2-Q6, H2-Q7, PNP, B2M	499	13	13588	12.5679	0.149974	0.00143691	0.115123
GOTERM_BP_FAT	GO:0002891~positive regulation of immunoglobulin mediated immune response	6	0.894188	9.85757e-05	PTPRC, NOD2, C3, FCER1G, FCGR1, FCGR3	499	14	13588	11.6702	0.217428	0.00207555	0.173652
GOTERM_BP_FAT	GO:0002714~positive regulation of B cell mediated immunity	6	0.894188	9.85757e-05	PTPRC, NOD2, C3, FCER1G, FCGR1, FCGR3	499	14	13588	11.6702	0.217428	0.00207555	0.173652
GOTERM_BP_FAT	GO:0050766~positive regulation of phagocytosis	7	1.04322	0.000139378	SLC11A1, NOD2, FCGR2B, C3, FCER1G, FCGR1, FCGR3	499	23	13588	8.28753	0.292953	0.00281439	0.245448
GOTERM_BP_FAT	GO:0001912~positive regulation of leukocyte mediated cytotoxicity	7	1.04322	0.000139378	H2-K1, PTPRC, TAP2, STAT5A, H2-Q6, H2-Q7, PNP, B2M	499	23	13588	8.28753	0.292953	0.00281439	0.245448
GOTERM_BP_FAT	GO:0031343~positive regulation of cell killing	7	1.04322	0.000139378	H2-K1, PTPRC, TAP2, STAT5A, H2-Q6, H2-Q7, PNP, B2M	499	23	13588	8.28753	0.292953	0.00281439	0.245448
GOTERM_BP_FAT	GO:0006909~phagocytosis	9	1.34128	0.000369084	SLC11A1, FCGR2B, HCK, IRF8, FCER1G, LBP, VAV1, FCGR1, FCGR3	499	49	13588	5.00151	0.600716	0.00658314	0.648723
GOTERM_BP_FAT	GO:0002675~positive regulation of acute inflammatory response	5	0.745156	0.000478991	C3, FCER1G, LBP, FCGR1, FCGR3	499	11	13588	12.3775	0.696246	0.00829781	0.841134
GOTERM_BP_FAT	GO:0001910~regulation of leukocyte mediated cytotoxicity	7	1.04322	0.000659313	H2-K1, PTPRC, TAP2, STAT5A, H2-Q6, H2-Q7, PNP, B2M	499	30	13588	6.35377	0.806069	0.0108038	1.15606
GOTERM_BP_FAT	GO:0031341~regulation of cell killing	7	1.04322	0.000659313	H2-K1, PTPRC, TAP2, STAT5A, H2-Q6, H2-Q7, PNP, B2M	499	30	13588	6.35377	0.806069	0.0108038	1.15606
GOTERM_BP_FAT	GO:0045807~positive regulation of endocytosis	7	1.04322	0.00131917	SLC11A1, NOD2, FCGR2B, C3, FCER1G, FCGR1, FCGR3	499	34	13588	5.60627	0.962482	0.0185847	2.30043
GOTERM_BP_FAT	GO:0002886~regulation of myeloid leukocyte mediated immunity	5	0.745156	0.00176277	ADORA3, C3, FCER1G, FCGR1, FCGR3	499	15	13588	9.07682	0.987573	0.023821	3.06273
GOTERM_BP_FAT	GO:0002892~regulation of type II hypersensitivity	4	0.596125	0.00238748	C3, FCER1G, FCGR1, FCGR3	499	8	13588	13.6152	0.99738	0.0309642	4.12673
GOTERM_BP_FAT	GO:0002894~positive regulation of type II hypersensitivity	4	0.596125	0.00238748	C3, FCER1G, FCGR1, FCGR3	499	8	13588	13.6152	0.99738	0.0309642	4.12673
GOTERM_BP_FAT	GO:0002888~positive regulation of myeloid leukocyte mediated immunity	4	0.596125	0.00238748	C3, FCER1G, FCGR1, FCGR3	499	8	13588	13.6152	0.99738	0.0309642	4.12673
GOTERM_BP_FAT	GO:0001796~regulation of type IIa hypersensitivity	4	0.596125	0.00238748	C3, FCER1G, FCGR1, FCGR3	499	8	13588	13.6152	0.99738	0.0309642	4.12673
GOTERM_BP_FAT	GO:0001798~positive regulation of type IIa hypersensitivity	4	0.596125	0.00238748	C3, FCER1G, FCGR1, FCGR3	499	8	13588	13.6152	0.99738	0.0309642	4.12673
GOTERM_BP_FAT	GO:0030100~regulation of endocytosis	8	1.19225	0.00272896	SLC11A1, NOD2, FCGR2B, C3, FCER1G, FCGR1, TGFB1, FCGR3	499	52	13588	4.1893	0.998882	0.0337419	4.70368
GOTERM_BP_FAT	GO:0060627~regulation of vesicle-mediated transport	10	1.49031	0.00328649	B4GALT1, SLC11A1, NOD2, ADORA3, FCGR2B, C3, FCER1G, FCGR1, TGFB1, FCGR3	499	83	13588	3.28078	0.999722	0.0389632	5.63861
GOTERM_BP_FAT	GO:0051050~positive regulation of transport	13	1.93741	0.00333744	SGK1, ADORA3, TNF, C3, NLRP3, FCGR1, FCGR3, INHBB, SLC11A1, NOD2, FCGR2B, PYCARD, FCER1G	499	132	13588	2.68179	0.999755	0.0391833	5.72361
GOTERM_BP_FAT	GO:0001803~regulation of type III hypersensitivity	3	0.447094	0.00392398	FCER1G, FCGR1, FCGR3	499	3	13588	27.2305	0.999943	0.0450758	6.69702
GOTERM_BP_FAT	GO:0001805~positive regulation of type III hypersensitivity	3	0.447094	0.00392398	FCER1G, FCGR1, FCGR3	499	3	13588	27.2305	0.999943	0.0450758	6.69702
GOTERM_BP_FAT	GO:0002866~positive regulation of acute inflammatory response to antigenic stimulus	4	0.596125	0.00484299	C3, FCER1G, FCGR1, FCGR3	499	10	13588	10.8922	0.999994	0.0529338	8.20314
GOTERM_BP_FAT	GO:0002885~positive regulation of hypersensitivity	4	0.596125	0.00484299	C3, FCER1G, FCGR1, FCGR3	499	10	13588	10.8922	0.999994	0.0529338	8.20314
GOTERM_BP_FAT	GO:0002428~antigen processing and presentation of peptide antigen via MHC class Ib	3	0.447094	0.00765754	TAP2, H2-Q6, H2-Q7, B2M	499	4	13588	20.4228	1	0.0784508	12.6744
GOTERM_BP_FAT	GO:0002863~positive regulation of inflammatory response to antigenic stimulus	4	0.596125	0.0106351	C3, FCER1G, FCGR1, FCGR3	499	13	13588	8.3786	1	0.102853	17.1805
GOTERM_BP_FAT	GO:0051130~positive regulation of cellular component organization	11	1.63934	0.0141671	SLC11A1, NOD2, TNF, PLEK, FCGR2B, C3, FCER1G, FCGR1, TGFB1, FCGR3, TES	499	122	13588	2.45521	1	0.130867	22.2413
GOTERM_BP_FAT	GO:0006911~phagocytosis, engulfment	4	0.596125	0.016025	FCGR2B, FCER1G, FCGR1, FCGR3	499	15	13588	7.26146	1	0.144205	24.7849
GOTERM_BP_FAT	GO:0002437~inflammatory response to antigenic stimulus	3	0.447094	0.0249089	IL20RB, FCGR1, FCGR3	499	7	13588	11.6702	1	0.199451	35.8997
GOTERM_BP_FAT	GO:0002475~antigen processing and presentation via MHC class Ib	3	0.447094	0.0249089	TAP2, H2-Q6, H2-Q7, B2M	499	7	13588	11.6702	1	0.199451	35.8997
GOTERM_BP_FAT	GO:0001810~regulation of type I hypersensitivity	3	0.447094	0.0324161	FCGR2B, FCER1G, FCGR3	499	8	13588	10.2114	1	0.24618	44.0651
GOTERM_BP_FAT	GO:0010324~membrane invagination	12	1.78838	0.0855249	SLC11A1, MSR1, FCGR2B, HCK, IRF8, FCER1G, NOSTRIN, LBP, VAV1, SCARA5, FCGR1, FCGR3	499	188	13588	1.73811	1	0.487123	79.3254
GOTERM_BP_FAT	GO:0006897~endocytosis	12	1.78838	0.0855249	SLC11A1, MSR1, FCGR2B, HCK, IRF8, FCER1G, NOSTRIN, LBP, VAV1, SCARA5, FCGR1, FCGR3	499	188	13588	1.73811	1	0.487123	79.3254
GOTERM_BP_FAT	GO:0019886~antigen processing and presentation of exogenous peptide antigen via MHC class II	3	0.447094	0.114751	FCGR2B, FCER1G, IFI30	499	16	13588	5.10571	1	0.578366	88.339
GOTERM_BP_FAT	GO:0002495~antigen processing and presentation of peptide antigen via MHC class II	3	0.447094	0.114751	FCGR2B, FCER1G, IFI30	499	16	13588	5.10571	1	0.578366	88.339
GOTERM_BP_FAT	GO:0002504~antigen processing and presentation of peptide or polysaccharide antigen via MHC class II	3	0.447094	0.152409	FCGR2B, FCER1G, IFI30	499	19	13588	4.29955	1	0.670925	94.5815
GOTERM_BP_FAT	GO:0016044~membrane organization	13	1.93741	0.295187	SLC11A1, MSR1, FCGR2B, HCK, IRF8, FCER1G, NOSTRIN, PMAIP1, LBP, VAV1, SCARA5, FCGR1, FCGR3	499	272	13588	1.30146	1	0.87151	99.7904
GOTERM_BP_FAT	GO:0016192~vesicle-mediated transport	18	2.68256	0.543557	ADORA3, MSR1, PLEK, AP1G2, HCK, MYO1F, NOSTRIN, VAV1, WAS, FCGR1, FCGR3, SLC11A1, FCGR2B, IRF8, FCER1G, LBP, STX11, SCARA5	499	466	13588	1.05182	1	0.979144	99.9999
Annotation Cluster 9	Enrichment Score: 4.176256321087774
Category	Term	Count	%	PValue	Genes	List Total	Pop Hits	Pop Total	Fold Enrichment	Bonferroni	Benjamini	FDR
GOTERM_BP_FAT	GO:0050727~regulation of inflammatory response	21	3.12966	4.55425e-15	ZFP36, SBNO2, ADORA3, C3, STAT5A, SERPING1, FCGR1, ADA, FCGR3, TNFRSF1A, TNFRSF1B, IL20RB, FCGR2B, AOAH, TGM2, CFH, FCER1G, FABP4, LBP, NT5E, SPN	499	57	13588	10.0323	1.13206e-11	1.02918e-12	8.02691e-12
GOTERM_BP_FAT	GO:0050865~regulation of cell activation	26	3.87481	4.55016e-10	ITGAL, ADORA3, LRRC32, STAT5A, IL4RA, PNP, ADA, TGFB1, MYD88, FCER1G, IL2RG, FAS, SPN, PTPRC, PTPN6, SELP, ICOSL, IKZF1, PLEK, CD40, CD38, CDKN1A, FCGR2B, CD80, IL20RB, CD274	499	156	13588	4.53841	1.13163e-06	3.90216e-08	8.0222e-07
GOTERM_BP_FAT	GO:0032944~regulation of mononuclear cell proliferation	18	2.68256	3.54722e-09	PTPN6, ITGAL, PTPRC, ICOSL, LRRC32, STAT5A, CD40, PNP, ADA, TGFB1, CD38, CDKN1A, MYD88, IL20RB, CD80, FCGR2B, CD274, SPN	499	80	13588	6.12685	8.8219e-06	2.45054e-07	6.25396e-06
GOTERM_BP_FAT	GO:0050670~regulation of lymphocyte proliferation	18	2.68256	3.54722e-09	PTPN6, ITGAL, PTPRC, ICOSL, LRRC32, STAT5A, CD40, PNP, ADA, TGFB1, CD38, CDKN1A, MYD88, IL20RB, CD80, FCGR2B, CD274, SPN	499	80	13588	6.12685	8.8219e-06	2.45054e-07	6.25396e-06
GOTERM_BP_FAT	GO:0050867~positive regulation of cell activation	20	2.98063	3.72011e-09	SELP, PTPRC, ITGAL, ICOSL, ADORA3, PLEK, IKZF1, STAT5A, IL4RA, CD40, PNP, ADA, TGFB1, CD38, CDKN1A, MYD88, CD80, FCER1G, IL2RG, SPN	499	101	13588	5.39217	9.25186e-06	2.50052e-07	6.55876e-06
GOTERM_BP_FAT	GO:0070663~regulation of leukocyte proliferation	18	2.68256	5.29198e-09	PTPN6, ITGAL, PTPRC, ICOSL, LRRC32, STAT5A, CD40, PNP, ADA, TGFB1, CD38, CDKN1A, MYD88, IL20RB, CD80, FCGR2B, CD274, SPN	499	82	13588	5.97742	1.31611e-05	3.37465e-07	9.33006e-06
GOTERM_BP_FAT	GO:0002694~regulation of leukocyte activation	24	3.57675	9.2262e-09	PTPN6, PTPRC, ITGAL, ICOSL, ADORA3, IKZF1, LRRC32, STAT5A, IL4RA, CD40, PNP, ADA, TGFB1, CD38, CDKN1A, MYD88, IL20RB, CD80, FCGR2B, CD274, FCER1G, IL2RG, FAS, SPN	499	154	13588	4.24371	2.29453e-05	5.46323e-07	1.62663e-05
GOTERM_BP_FAT	GO:0051249~regulation of lymphocyte activation	22	3.27869	6.24982e-08	PTPN6, PTPRC, ITGAL, ICOSL, IKZF1, LRRC32, STAT5A, IL4RA, CD40, PNP, ADA, TGFB1, CD38, CDKN1A, MYD88, IL20RB, CD80, FCGR2B, CD274, IL2RG, FAS, SPN	499	144	13588	4.16021	0.000155421	3.10865e-06	0.000110188
GOTERM_BP_FAT	GO:0048585~negative regulation of response to stimulus	15	2.23547	7.19962e-08	ZFP36, PTPRC, PTPN6, SOCS3, SERPING1, ADA, TGFB1, IRAK3, TNFRSF1B, FCGR2B, IL20RB, AOAH, IL1B, NT5E, SPN	499	65	13588	6.28395	0.000179039	3.51087e-06	0.000126933
GOTERM_BP_FAT	GO:0002696~positive regulation of leukocyte activation	18	2.68256	1.01279e-07	PTPRC, ITGAL, ICOSL, ADORA3, IKZF1, STAT5A, IL4RA, CD40, PNP, ADA, TGFB1, CD38, CDKN1A, MYD88, CD80, FCER1G, IL2RG, SPN	499	99	13588	4.95099	0.000251849	4.66444e-06	0.00017856
GOTERM_BP_FAT	GO:0008284~positive regulation of cell proliferation	30	4.47094	6.1469e-07	ITGAL, TNF, STAT5A, CSF1, GLI2, PNP, TGFB1, ADA, GLI1, MYD88, RAC2, TGM2, MYC, FGF2, SPN, B4GALT1, PTPRC, ICOSL, LYN, HCLS1, FLT4, RASIP1, CD40, CD38, CDKN1A, CD80, ADM, NOTCH4, TGIF1, FABP4	499	284	13588	2.87646	0.00152757	2.31624e-05	0.00108373
GOTERM_BP_FAT	GO:0031348~negative regulation of defense response	10	1.49031	7.98315e-07	ZFP36, IRAK3, TNFRSF1B, IL20RB, FCGR2B, AOAH, SERPING1, NT5E, ADA, SPN	499	30	13588	9.07682	0.00198344	2.87736e-05	0.00140747
GOTERM_BP_FAT	GO:0032946~positive regulation of mononuclear cell proliferation	12	1.78838	1.46672e-06	ITGAL, CD38, PTPRC, CDKN1A, ICOSL, MYD88, CD80, STAT5A, CD40, PNP, ADA, SPN	499	50	13588	6.53531	0.00364109	4.99677e-05	0.00258588
GOTERM_BP_FAT	GO:0050671~positive regulation of lymphocyte proliferation	12	1.78838	1.46672e-06	ITGAL, CD38, PTPRC, CDKN1A, ICOSL, MYD88, CD80, STAT5A, CD40, PNP, ADA, SPN	499	50	13588	6.53531	0.00364109	4.99677e-05	0.00258588
GOTERM_BP_FAT	GO:0051251~positive regulation of lymphocyte activation	16	2.3845	1.51303e-06	ITGAL, PTPRC, ICOSL, IKZF1, STAT5A, IL4RA, CD40, PNP, ADA, TGFB1, CD38, CDKN1A, MYD88, CD80, IL2RG, SPN	499	94	13588	4.63497	0.00375585	5.0849e-05	0.00266753
GOTERM_BP_FAT	GO:0070665~positive regulation of leukocyte proliferation	12	1.78838	2.21954e-06	ITGAL, CD38, PTPRC, CDKN1A, ICOSL, MYD88, CD80, STAT5A, CD40, PNP, ADA, SPN	499	52	13588	6.28395	0.00550479	7.16857e-05	0.0039131
GOTERM_BP_FAT	GO:0002683~negative regulation of immune system process	14	2.08644	3.39841e-06	PTPRC, PTPN6, LRRC32, IL4RA, SERPING1, ADA, TGFB1, IRAK3, NOD2, FCGR2B, IL20RB, CD274, FAS, SPN	499	76	13588	5.01614	0.00841623	0.000103066	0.00599142
GOTERM_BP_FAT	GO:0050864~regulation of B cell activation	12	1.78838	3.98041e-06	CD38, PTPN6, PTPRC, CDKN1A, FCGR2B, STAT5A, IL2RG, FAS, CD40, PNP, ADA, TGFB1	499	55	13588	5.94119	0.00985046	0.000117842	0.00701746
GOTERM_BP_FAT	GO:0042129~regulation of T cell proliferation	12	1.78838	8.15478e-06	ITGAL, PTPN6, PTPRC, ICOSL, IL20RB, CD80, LRRC32, STAT5A, CD274, PNP, TGFB1, SPN	499	59	13588	5.5384	0.0200767	0.000222844	0.0143764
GOTERM_BP_FAT	GO:0050863~regulation of T cell activation	16	2.3845	8.89837e-06	PTPN6, ITGAL, PTPRC, ICOSL, IKZF1, LRRC32, STAT5A, IL4RA, PNP, ADA, TGFB1, CD80, IL20RB, CD274, IL2RG, SPN	499	108	13588	4.03414	0.0218873	0.000235402	0.0156872
GOTERM_BP_FAT	GO:0050728~negative regulation of inflammatory response	8	1.19225	8.99326e-06	ZFP36, TNFRSF1B, IL20RB, FCGR2B, AOAH, NT5E, ADA, SPN	499	22	13588	9.90199	0.0221181	0.000235407	0.0158545
GOTERM_BP_FAT	GO:0050777~negative regulation of immune response	8	1.19225	3.05337e-05	PTPN6, PTPRC, IRAK3, IL20RB, FCGR2B, SERPING1, TGFB1, SPN	499	26	13588	8.3786	0.0731268	0.000709454	0.0538191
GOTERM_BP_FAT	GO:0050871~positive regulation of B cell activation	9	1.34128	4.64744e-05	CD38, PTPRC, CDKN1A, STAT5A, IL2RG, CD40, PNP, ADA, TGFB1	499	37	13588	6.62363	0.109155	0.00105985	0.0819054
GOTERM_BP_FAT	GO:0050870~positive regulation of T cell activation	11	1.63934	0.000133193	ITGAL, PTPRC, ICOSL, IKZF1, CD80, STAT5A, IL4RA, IL2RG, PNP, ADA, SPN	499	66	13588	4.53841	0.281992	0.00273406	0.234568
GOTERM_BP_FAT	GO:0045597~positive regulation of cell differentiation	18	2.68256	0.000240349	PTPRC, MSR1, IKZF1, SOCS3, STAT5A, CSF1, IL4RA, GLI2, PNP, ADA, ADAMTS9, ETS1, TGIF1, IL2RG, RUNX1, IGFBP3, FGF2, IFI204	499	175	13588	2.80085	0.449991	0.00462355	0.422904
GOTERM_BP_FAT	GO:0032102~negative regulation of response to external stimulus	8	1.19225	0.00028202	ZFP36, TNFRSF1B, IL20RB, FCGR2B, AOAH, NT5E, ADA, SPN	499	36	13588	6.05121	0.50415	0.00530016	0.496053
GOTERM_BP_FAT	GO:0046635~positive regulation of alpha-beta T cell activation	7	1.04322	0.000289501	PTPRC, IKZF1, CD80, IL4RA, IL2RG, PNP, ADA	499	26	13588	7.33128	0.513293	0.0053996	0.50918
GOTERM_BP_FAT	GO:0051250~negative regulation of lymphocyte activation	9	1.34128	0.000559436	PTPN6, IL20RB, FCGR2B, LRRC32, CD274, IL4RA, FAS, TGFB1, SPN	499	52	13588	4.71296	0.751349	0.00942272	0.981743
GOTERM_BP_FAT	GO:0002698~negative regulation of immune effector process	6	0.894188	0.000636096	PTPN6, PTPRC, IL20RB, FCGR2B, SERPING1, SPN	499	20	13588	8.16914	0.794534	0.0105644	1.11556
GOTERM_BP_FAT	GO:0050866~negative regulation of cell activation	9	1.34128	0.000638133	PTPN6, IL20RB, FCGR2B, LRRC32, CD274, IL4RA, FAS, TGFB1, SPN	499	53	13588	4.62404	0.795573	0.0105278	1.11911
GOTERM_BP_FAT	GO:0002695~negative regulation of leukocyte activation	9	1.34128	0.000638133	PTPN6, IL20RB, FCGR2B, LRRC32, CD274, IL4RA, FAS, TGFB1, SPN	499	53	13588	4.62404	0.795573	0.0105278	1.11911
GOTERM_BP_FAT	GO:0045582~positive regulation of T cell differentiation	7	1.04322	0.000945669	PTPRC, IKZF1, STAT5A, IL4RA, IL2RG, PNP, ADA	499	32	13588	5.95666	0.904916	0.0144197	1.65422
GOTERM_BP_FAT	GO:0002823~negative regulation of adaptive immune response based on somatic recombination of immune receptors built from immunoglobulin superfamily domains	5	0.745156	0.000978841	PTPN6, PTPRC, IL20RB, FCGR2B, SPN	499	13	13588	10.4733	0.912452	0.0146526	1.71178
GOTERM_BP_FAT	GO:0002820~negative regulation of adaptive immune response	5	0.745156	0.000978841	PTPN6, PTPRC, IL20RB, FCGR2B, SPN	499	13	13588	10.4733	0.912452	0.0146526	1.71178
GOTERM_BP_FAT	GO:0045619~regulation of lymphocyte differentiation	9	1.34128	0.0011762	PTPN6, PTPRC, IKZF1, STAT5A, IL4RA, IL2RG, FAS, PNP, ADA	499	58	13588	4.22542	0.946439	0.0170699	2.05356
GOTERM_BP_FAT	GO:0045621~positive regulation of lymphocyte differentiation	7	1.04322	0.00131917	PTPRC, IKZF1, STAT5A, IL4RA, IL2RG, PNP, ADA	499	34	13588	5.60627	0.962482	0.0185847	2.30043
GOTERM_BP_FAT	GO:0046634~regulation of alpha-beta T cell activation	7	1.04322	0.00131917	PTPRC, IKZF1, CD80, IL4RA, IL2RG, PNP, ADA	499	34	13588	5.60627	0.962482	0.0185847	2.30043
GOTERM_BP_FAT	GO:0002707~negative regulation of lymphocyte mediated immunity	5	0.745156	0.00133095	PTPN6, PTPRC, IL20RB, FCGR2B, SPN	499	14	13588	9.72516	0.963567	0.0186437	2.32075
GOTERM_BP_FAT	GO:0002704~negative regulation of leukocyte mediated immunity	5	0.745156	0.00133095	PTPN6, PTPRC, IL20RB, FCGR2B, SPN	499	14	13588	9.72516	0.963567	0.0186437	2.32075
GOTERM_BP_FAT	GO:0042102~positive regulation of T cell proliferation	7	1.04322	0.00154358	ITGAL, PTPRC, ICOSL, CD80, STAT5A, PNP, SPN	499	35	13588	5.44609	0.978546	0.0212342	2.68677
GOTERM_BP_FAT	GO:0070664~negative regulation of leukocyte proliferation	7	1.04322	0.00154358	PTPN6, IL20RB, FCGR2B, LRRC32, CD274, TGFB1, SPN	499	35	13588	5.44609	0.978546	0.0212342	2.68677
GOTERM_BP_FAT	GO:0032945~negative regulation of mononuclear cell proliferation	7	1.04322	0.00154358	PTPN6, IL20RB, FCGR2B, LRRC32, CD274, TGFB1, SPN	499	35	13588	5.44609	0.978546	0.0212342	2.68677
GOTERM_BP_FAT	GO:0050672~negative regulation of lymphocyte proliferation	7	1.04322	0.00154358	PTPN6, IL20RB, FCGR2B, LRRC32, CD274, TGFB1, SPN	499	35	13588	5.44609	0.978546	0.0212342	2.68677
GOTERM_BP_FAT	GO:0045577~regulation of B cell differentiation	5	0.745156	0.00228291	PTPN6, PTPRC, STAT5A, IL2RG, PNP	499	16	13588	8.50952	0.9966	0.0299389	3.9494
GOTERM_BP_FAT	GO:0042130~negative regulation of T cell proliferation	6	0.894188	0.00316667	PTPN6, IL20RB, LRRC32, CD274, TGFB1, SPN	499	28	13588	5.8351	0.999625	0.0379287	5.43841
GOTERM_BP_FAT	GO:0002865~negative regulation of acute inflammatory response to antigenic stimulus	3	0.447094	0.00392398	IL20RB, FCGR2B, SPN	499	3	13588	27.2305	0.999943	0.0450758	6.69702
GOTERM_BP_FAT	GO:0002884~negative regulation of hypersensitivity	3	0.447094	0.00392398	IL20RB, FCGR2B, SPN	499	3	13588	27.2305	0.999943	0.0450758	6.69702
GOTERM_BP_FAT	GO:0002674~negative regulation of acute inflammatory response	3	0.447094	0.00392398	IL20RB, FCGR2B, SPN	499	3	13588	27.2305	0.999943	0.0450758	6.69702
GOTERM_BP_FAT	GO:0050868~negative regulation of T cell activation	7	1.04322	0.00401961	PTPN6, IL20RB, LRRC32, CD274, IL4RA, TGFB1, SPN	499	42	13588	4.53841	0.999955	0.0459391	6.85483
GOTERM_BP_FAT	GO:0046638~positive regulation of alpha-beta T cell differentiation	5	0.745156	0.00445618	IKZF1, IL4RA, IL2RG, PNP, ADA	499	19	13588	7.16591	0.999985	0.0492343	7.57203
GOTERM_BP_FAT	GO:0030888~regulation of B cell proliferation	6	0.894188	0.0057542	CD38, PTPRC, CDKN1A, FCGR2B, CD40, ADA	499	32	13588	5.10571	0.999999	0.0615302	9.67382
GOTERM_BP_FAT	GO:0030890~positive regulation of B cell proliferation	5	0.745156	0.00771094	CD38, PTPRC, CDKN1A, CD40, ADA	499	22	13588	6.18874	1	0.0786552	12.7572
GOTERM_BP_FAT	GO:0046637~regulation of alpha-beta T cell differentiation	5	0.745156	0.00771094	IKZF1, IL4RA, IL2RG, PNP, ADA	499	22	13588	6.18874	1	0.0786552	12.7572
GOTERM_BP_FAT	GO:0045580~regulation of T cell differentiation	7	1.04322	0.0078215	PTPRC, IKZF1, STAT5A, IL4RA, IL2RG, PNP, ADA	499	48	13588	3.97111	1	0.0790955	12.9284
GOTERM_BP_FAT	GO:0002862~negative regulation of inflammatory response to antigenic stimulus	3	0.447094	0.0124538	IL20RB, FCGR2B, SPN	499	5	13588	16.3383	1	0.117211	19.8241
GOTERM_BP_FAT	GO:0048541~Peyer's patch development	3	0.447094	0.0182303	IKZF1, STAT5A, ADA	499	6	13588	13.6152	1	0.158583	27.7022
GOTERM_BP_FAT	GO:0002710~negative regulation of T cell mediated immunity	3	0.447094	0.0182303	PTPRC, IL20RB, SPN	499	6	13588	13.6152	1	0.158583	27.7022
GOTERM_BP_FAT	GO:0048537~mucosal-associated lymphoid tissue development	3	0.447094	0.0249089	IKZF1, STAT5A, ADA	499	7	13588	11.6702	1	0.199451	35.8997
GOTERM_BP_FAT	GO:0045579~positive regulation of B cell differentiation	3	0.447094	0.0324161	STAT5A, IL2RG, PNP	499	8	13588	10.2114	1	0.24618	44.0651
GOTERM_BP_FAT	GO:0042113~B cell activation	6	0.894188	0.157588	PTPRC, ICOSL, IKZF1, BCL3, CD40, ADA	499	78	13588	2.09465	1	0.682243	95.1365
GOTERM_BP_FAT	GO:0030183~B cell differentiation	4	0.596125	0.237305	PTPRC, IKZF1, BCL3, ADA	499	46	13588	2.36787	1	0.812085	99.1571
Annotation Cluster 10	Enrichment Score: 4.0503342395395325
Category	Term	Count	%	PValue	Genes	List Total	Pop Hits	Pop Total	Fold Enrichment	Bonferroni	Benjamini	FDR
GOTERM_BP_FAT	GO:0042110~T cell activation	22	3.27869	1.16656e-09	PTPRC, ITGAL, ICOSL, IKZF1, ELF4, STAT5A, RELB, ITGB2, WAS, VAV1, TGFB1, ITGAM, SLC11A1, BCL2A1D, CD86, IL23A, GADD45G, IRF1, BCL3, FAS, LCP1, SPN	499	116	13588	5.1644	2.90122e-06	8.79159e-08	2.05671e-06
GOTERM_BP_FAT	GO:0042098~T cell proliferation	8	1.19225	5.15701e-05	ITGAL, PTPRC, SLC11A1, CD86, IL23A, ELF4, ITGB2, ITGAM	499	28	13588	7.78013	0.120374	0.0011653	0.0908821
GOTERM_BP_FAT	GO:0070661~leukocyte proliferation	9	1.34128	0.000143891	ITGAL, PTPRC, SLC11A1, CD86, IL23A, ELF4, ITGB2, TGFB1, ITGAM	499	43	13588	5.6994	0.300845	0.00285897	0.253385
GOTERM_BP_FAT	GO:0032943~mononuclear cell proliferation	9	1.34128	0.000143891	ITGAL, PTPRC, SLC11A1, CD86, IL23A, ELF4, ITGB2, TGFB1, ITGAM	499	43	13588	5.6994	0.300845	0.00285897	0.253385
GOTERM_BP_FAT	GO:0046651~lymphocyte proliferation	8	1.19225	0.0007539	ITGAL, PTPRC, SLC11A1, CD86, IL23A, ELF4, ITGB2, ITGAM	499	42	13588	5.18675	0.846746	0.0118758	1.32087
GOTERM_BP_FAT	GO:0008283~cell proliferation	20	2.98063	0.00189942	PTPRC, ITGAL, CEBPB, TNF, ELF4, NCF1, PIM1, ITGB2, GLI2, TGFB1, ITGAM, SLC11A1, NDE1, UHRF1, TNFRSF1B, CD86, APOA1, IL23A, AGT, IL1B	499	247	13588	2.2049	0.991159	0.0253701	3.29641
GOTERM_BP_FAT	GO:0050798~activated T cell proliferation	3	0.447094	0.0249089	ITGAL, ITGB2, ITGAM	499	7	13588	11.6702	1	0.199451	35.8997
Annotation Cluster 11	Enrichment Score: 3.763634347444436
Category	Term	Count	%	PValue	Genes	List Total	Pop Hits	Pop Total	Fold Enrichment	Bonferroni	Benjamini	FDR
GOTERM_BP_FAT	GO:0043067~regulation of programmed cell death	46	6.85544	6.10558e-07	IFIH1, TNF, NUAK2, STAT5A, MMP9, IL19, NLRP1B, PMAIP1, PNP, TGFB1, ADA, TIMP1, IRAK3, NOD2, CASP4, AGT, CASP8, TGM2, PYCARD, BCL3, FCER1G, FAS, FGF2, MYC, SPN, ANGPTL4, B4GALT1, PIK3CG, CFLAR, PTPRC, PTPN6, CEBPB, SGK3, PIM1, BIRC3, NLRP3, FCGR1, FCGR3, BCL2A1D, CDKN1A, TNFRSF10B, BCL2A1B, BCL2A1A, RIPK3, IGFBP3, IFI204	499	560	13588	2.23679	0.00151731	2.33606e-05	0.00107644
GOTERM_BP_FAT	GO:0010941~regulation of cell death	46	6.85544	7.08949e-07	IFIH1, TNF, NUAK2, STAT5A, MMP9, IL19, NLRP1B, PMAIP1, PNP, TGFB1, ADA, TIMP1, IRAK3, NOD2, CASP4, AGT, CASP8, TGM2, PYCARD, BCL3, FCER1G, FAS, FGF2, MYC, SPN, ANGPTL4, B4GALT1, PIK3CG, CFLAR, PTPRC, PTPN6, CEBPB, SGK3, PIM1, BIRC3, NLRP3, FCGR1, FCGR3, BCL2A1D, CDKN1A, TNFRSF10B, BCL2A1B, BCL2A1A, RIPK3, IGFBP3, IFI204	499	563	13588	2.22487	0.0017616	2.63154e-05	0.00124991
GOTERM_BP_FAT	GO:0042981~regulation of apoptosis	45	6.70641	1.07411e-06	IFIH1, TNF, NUAK2, STAT5A, MMP9, IL19, NLRP1B, PMAIP1, PNP, TGFB1, ADA, TIMP1, IRAK3, NOD2, CASP4, AGT, CASP8, TGM2, PYCARD, BCL3, FCER1G, FAS, MYC, SPN, ANGPTL4, B4GALT1, PIK3CG, CFLAR, PTPRC, PTPN6, CEBPB, SGK3, PIM1, BIRC3, NLRP3, FCGR1, FCGR3, BCL2A1D, CDKN1A, TNFRSF10B, BCL2A1B, BCL2A1A, RIPK3, IGFBP3, IFI204	499	553	13588	2.21586	0.00266774	3.76233e-05	0.0018937
GOTERM_BP_FAT	GO:0043068~positive regulation of programmed cell death	22	3.27869	0.000357182	B4GALT1, PTPN6, PTPRC, CEBPB, TNF, MMP9, IL19, PMAIP1, FCGR1, TGFB1, FCGR3, CDKN1A, CASP4, PYCARD, RIPK3, TGM2, BCL3, FAS, IGFBP3, MYC, SPN, IFI204	499	250	13588	2.39628	0.588715	0.0064642	0.627865
GOTERM_BP_FAT	GO:0010942~positive regulation of cell death	22	3.27869	0.000397444	B4GALT1, PTPN6, PTPRC, CEBPB, TNF, MMP9, IL19, PMAIP1, FCGR1, TGFB1, FCGR3, CDKN1A, CASP4, PYCARD, RIPK3, TGM2, BCL3, FAS, IGFBP3, MYC, SPN, IFI204	499	252	13588	2.37726	0.627917	0.00703683	0.698405
GOTERM_BP_FAT	GO:0043065~positive regulation of apoptosis	21	3.12966	0.000817693	B4GALT1, PTPN6, PTPRC, CEBPB, TNF, MMP9, IL19, PMAIP1, FCGR1, TGFB1, FCGR3, CASP4, PYCARD, RIPK3, TGM2, BCL3, FAS, IGFBP3, MYC, SPN, IFI204	499	248	13588	2.30581	0.869246	0.0126347	1.43188
GOTERM_BP_FAT	GO:0006917~induction of apoptosis	16	2.3845	0.00123592	PTPN6, CEBPB, TNF, IL19, PMAIP1, FCGR1, FCGR3, CASP4, PYCARD, RIPK3, TGM2, BCL3, FAS, MYC, SPN, IFI204	499	167	13588	2.60891	0.95384	0.0176211	2.15675
GOTERM_BP_FAT	GO:0012502~induction of programmed cell death	16	2.3845	0.00123592	PTPN6, CEBPB, TNF, IL19, PMAIP1, FCGR1, FCGR3, CASP4, PYCARD, RIPK3, TGM2, BCL3, FAS, MYC, SPN, IFI204	499	167	13588	2.60891	0.95384	0.0176211	2.15675
GOTERM_BP_FAT	GO:0043066~negative regulation of apoptosis	19	2.83159	0.00310148	PIK3CG, CFLAR, CEBPB, SGK3, NUAK2, STAT5A, PIM1, PNP, ADA, TIMP1, CDKN1A, CASP4, BCL2A1A, AGT, FCER1G, BCL3, FAS, MYC, ANGPTL4	499	239	13588	2.16476	0.999559	0.037341	5.32933
GOTERM_BP_FAT	GO:0043069~negative regulation of programmed cell death	19	2.83159	0.00386132	PIK3CG, CFLAR, CEBPB, SGK3, NUAK2, STAT5A, PIM1, PNP, ADA, TIMP1, CDKN1A, CASP4, BCL2A1A, AGT, FCER1G, BCL3, FAS, MYC, ANGPTL4	499	244	13588	2.1204	0.999934	0.0445763	6.59348
GOTERM_BP_FAT	GO:0060548~negative regulation of cell death	19	2.83159	0.00403266	PIK3CG, CFLAR, CEBPB, SGK3, NUAK2, STAT5A, PIM1, PNP, ADA, TIMP1, CDKN1A, CASP4, BCL2A1A, AGT, FCER1G, BCL3, FAS, MYC, ANGPTL4	499	245	13588	2.11175	0.999957	0.0458747	6.87634
Annotation Cluster 12	Enrichment Score: 3.6616004754777283
Category	Term	Count	%	PValue	Genes	List Total	Pop Hits	Pop Total	Fold Enrichment	Bonferroni	Benjamini	FDR
GOTERM_BP_FAT	GO:0050900~leukocyte migration	13	1.93741	2.80139e-08	B4GALT1, SELP, TNF, C5AR1, ITGA6, CCR1, S100A9, FCER1G, IL1B, ITGB2, LBP, ITGAM, FCGR3	499	43	13588	8.23246	6.9668e-05	1.51457e-06	4.939e-05
GOTERM_BP_FAT	GO:0030595~leukocyte chemotaxis	9	1.34128	3.69155e-06	C5AR1, CCR1, S100A9, FCER1G, IL1B, ITGB2, LBP, ITGAM, FCGR3	499	27	13588	9.07682	0.00913887	0.000110607	0.00650821
GOTERM_BP_FAT	GO:0060326~cell chemotaxis	9	1.34128	3.69155e-06	C5AR1, CCR1, S100A9, FCER1G, IL1B, ITGB2, LBP, ITGAM, FCGR3	499	27	13588	9.07682	0.00913887	0.000110607	0.00650821
GOTERM_BP_FAT	GO:0030593~neutrophil chemotaxis	6	0.894188	0.000278092	C5AR1, FCER1G, IL1B, ITGB2, ITGAM, FCGR3	499	17	13588	9.61075	0.499281	0.00526632	0.48916
GOTERM_BP_FAT	GO:0016477~cell migration	19	2.83159	0.00324441	PLAT, PVR, B4GALT1, SELP, C5AR1, TNF, CCR1, S100A9, ITGB2, ITGAM, TGFB1, FCGR3, NDE1, APOA1, ITGA6, FCER1G, IL1B, LBP, TES	499	240	13588	2.15574	0.999691	0.0386572	5.56835
GOTERM_BP_FAT	GO:0048870~cell motility	19	2.83159	0.0171596	PLAT, PVR, B4GALT1, SELP, C5AR1, TNF, CCR1, S100A9, ITGB2, ITGAM, TGFB1, FCGR3, NDE1, APOA1, ITGA6, FCER1G, IL1B, LBP, TES	499	284	13588	1.82176	1	0.152046	26.2995
GOTERM_BP_FAT	GO:0051674~localization of cell	19	2.83159	0.0171596	PLAT, PVR, B4GALT1, SELP, C5AR1, TNF, CCR1, S100A9, ITGB2, ITGAM, TGFB1, FCGR3, NDE1, APOA1, ITGA6, FCER1G, IL1B, LBP, TES	499	284	13588	1.82176	1	0.152046	26.2995
GOTERM_BP_FAT	GO:0006928~cell motion	21	3.12966	0.050242	PLAT, PVR, B4GALT1, SELP, C5AR1, TNF, CCR1, S100A9, ITGB2, GLI2, VASP, ITGAM, TGFB1, FCGR3, NDE1, APOA1, ITGA6, FCER1G, IL1B, LBP, TES	499	367	13588	1.55815	1	0.344076	59.7001
Annotation Cluster 13	Enrichment Score: 3.240500313809213
Category	Term	Count	%	PValue	Genes	List Total	Pop Hits	Pop Total	Fold Enrichment	Bonferroni	Benjamini	FDR
GOTERM_BP_FAT	GO:0001568~blood vessel development	22	3.27869	0.000256963	B4GALT1, SOCS3, MMP19, TIPARP, CDH5, EPHA2, ANXA2, AGT, NOTCH4, CASP8, ECSCR, ROBO4, TGM2, IL1B, ZC3H12A, NOS3, NOS2, LOX, TNFAIP2, ANGPT2, FGF2, CYR61	499	244	13588	2.45521	0.472259	0.00490446	0.452074
GOTERM_BP_FAT	GO:0001944~vasculature development	22	3.27869	0.000357182	B4GALT1, SOCS3, MMP19, TIPARP, CDH5, EPHA2, ANXA2, AGT, NOTCH4, CASP8, ECSCR, ROBO4, TGM2, IL1B, ZC3H12A, NOS3, NOS2, LOX, TNFAIP2, ANGPT2, FGF2, CYR61	499	250	13588	2.39628	0.588715	0.0064642	0.627865
GOTERM_BP_FAT	GO:0048514~blood vessel morphogenesis	18	2.68256	0.00099725	B4GALT1, TIPARP, MMP19, EPHA2, ANXA2, NOTCH4, ECSCR, CASP8, ROBO4, TGM2, IL1B, ZC3H12A, NOS3, NOS2, TNFAIP2, ANGPT2, FGF2, CYR61	499	198	13588	2.4755	0.916374	0.014837	1.74371
GOTERM_BP_FAT	GO:0001525~angiogenesis	14	2.08644	0.00119244	B4GALT1, MMP19, ANXA2, NOTCH4, ECSCR, CASP8, ROBO4, ZC3H12A, IL1B, NOS3, TNFAIP2, ANGPT2, FGF2, CYR61	499	133	13588	2.86636	0.948561	0.0172033	2.08162
Annotation Cluster 14	Enrichment Score: 3.152847428923725
Category	Term	Count	%	PValue	Genes	List Total	Pop Hits	Pop Total	Fold Enrichment	Bonferroni	Benjamini	FDR
GOTERM_BP_FAT	GO:0007159~leukocyte adhesion	8	1.19225	2.33751e-07	VCAM1, ICAM1, ITGAL, SELP, PTPRC, ITGA5, ITGB2, ITGAM	499	14	13588	15.5603	0.00058117	9.85316e-06	0.000412116
GOTERM_BP_FAT	GO:0050798~activated T cell proliferation	3	0.447094	0.0249089	ITGAL, ITGB2, ITGAM	499	7	13588	11.6702	1	0.199451	35.8997
GOTERM_BP_FAT	GO:0007229~integrin-mediated signaling pathway	7	1.04322	0.0597515	ITGAL, ITGA6, ADAMTS14, ITGA5, ITGB2, VAV1, ITGAM	499	76	13588	2.50807	1	0.387093	66.2517
Annotation Cluster 15	Enrichment Score: 3.0566894671801963
Category	Term	Count	%	PValue	Genes	List Total	Pop Hits	Pop Total	Fold Enrichment	Bonferroni	Benjamini	FDR
GOTERM_BP_FAT	GO:0001816~cytokine production	11	1.63934	2.57675e-06	IRF9, SLC11A1, NOD2, MYD88, IRF7, GADD45G, IL19, FABP4, LBP, NLRP3, LCP2	499	43	13588	6.96593	0.0063879	8.21555e-05	0.00454286
GOTERM_BP_FAT	GO:0042089~cytokine biosynthetic process	5	0.745156	0.000978841	IRF9, MYD88, IRF7, GADD45G, IL19	499	13	13588	10.4733	0.912452	0.0146526	1.71178
GOTERM_BP_FAT	GO:0042107~cytokine metabolic process	5	0.745156	0.00133095	IRF9, MYD88, IRF7, GADD45G, IL19	499	14	13588	9.72516	0.963567	0.0186437	2.32075
GOTERM_BP_FAT	GO:0045351~type I interferon biosynthetic process	3	0.447094	0.0124538	IRF9, MYD88, IRF7	499	5	13588	16.3383	1	0.117211	19.8241
GOTERM_BP_FAT	GO:0032606~type I interferon production	3	0.447094	0.0124538	IRF9, MYD88, IRF7	499	5	13588	16.3383	1	0.117211	19.8241
Annotation Cluster 16	Enrichment Score: 2.781778609484844
Category	Term	Count	%	PValue	Genes	List Total	Pop Hits	Pop Total	Fold Enrichment	Bonferroni	Benjamini	FDR
GOTERM_BP_FAT	GO:0032675~regulation of interleukin-6 production	11	1.63934	1.2465e-07	IRAK3, NOD2, TNF, MYD88, CEBPB, TLR1, TLR2, FCER1G, IL1B, TLR6, TLR7	499	32	13588	9.36047	0.000309957	5.53579e-06	0.000219765
GOTERM_BP_FAT	GO:0032494~response to peptidoglycan	6	0.894188	2.493e-05	IRAK3, NOD2, MYD88, C5AR1, TLR2, NFKBIA	499	11	13588	14.853	0.0601187	0.000601777	0.0439439
GOTERM_BP_FAT	GO:0032755~positive regulation of interleukin-6 production	7	1.04322	2.99675e-05	NOD2, TNF, MYD88, TLR2, FCER1G, IL1B, TLR7	499	18	13588	10.5896	0.0718207	0.000716381	0.0528213
GOTERM_BP_FAT	GO:0032496~response to lipopolysaccharide	9	1.34128	5.70004e-05	IRAK3, SLC11A1, NOD2, MYD88, IL1B, NFKBIA, LBP, STAT1, CD14	499	38	13588	6.44932	0.132174	0.00127634	0.100447
GOTERM_BP_FAT	GO:0043900~regulation of multi-organism process	6	0.894188	6.53327e-05	DDX58, NOD2, MYD88, TLR2, ADA, SPN	499	13	13588	12.5679	0.149974	0.00143691	0.115123
GOTERM_BP_FAT	GO:0032760~positive regulation of tumor necrosis factor production	6	0.894188	0.000143426	NOD2, MYD88, TLR2, FCER1G, LBP, CD14	499	15	13588	10.8922	0.300035	0.00287268	0.252566
GOTERM_BP_FAT	GO:0051092~positive regulation of NF-kappaB transcription factor activity	7	1.04322	0.000229739	IRAK3, NOD2, TNF, MYD88, TLR2, ITGB2, TGFB1	499	25	13588	7.62453	0.435281	0.00448932	0.40427
GOTERM_BP_FAT	GO:0045088~regulation of innate immune response	9	1.34128	0.000235128	IRAK3, NOD2, MYD88, STAT5A, TLR2, MYO1F, NFKBIA, SERPING1, LBP	499	46	13588	5.3277	0.442801	0.00455859	0.413735
GOTERM_BP_FAT	GO:0002757~immune response-activating signal transduction	9	1.34128	0.000318891	PTPN6, PTPRC, BCL2A1D, NOD2, MYD88, LYN, TLR2, FCER1G, NFKBIA	499	48	13588	5.10571	0.547609	0.00581544	0.560735
GOTERM_BP_FAT	GO:0051090~regulation of transcription factor activity	9	1.34128	0.00131796	IRAK3, NOD2, TNF, MYD88, TLR2, NFKBIA, ITGB2, NLRP3, TGFB1	499	59	13588	4.1538	0.962369	0.0186736	2.29835
GOTERM_BP_FAT	GO:0051091~positive regulation of transcription factor activity	7	1.04322	0.00131917	IRAK3, NOD2, TNF, MYD88, TLR2, ITGB2, TGFB1	499	34	13588	5.60627	0.962482	0.0185847	2.30043
GOTERM_BP_FAT	GO:0051101~regulation of DNA binding	10	1.49031	0.00147603	MDFI, IRAK3, NOD2, TNF, MYD88, TLR2, NFKBIA, ITGB2, NLRP3, TGFB1	499	74	13588	3.67979	0.974615	0.0204266	2.57062
GOTERM_BP_FAT	GO:0051098~regulation of binding	11	1.63934	0.00165127	MDFI, IRAK3, NOD2, TNF, MYD88, TLR2, NFKBIA, ITGB2, NLRP3, MYC, TGFB1	499	90	13588	3.32817	0.983594	0.0225752	2.87165
GOTERM_BP_FAT	GO:0009620~response to fungus	5	0.745156	0.00289978	MYD88, HAMP, NCF1, TLR2, TGFB1	499	17	13588	8.00896	0.99927	0.0354669	4.99104
GOTERM_BP_FAT	GO:0043388~positive regulation of DNA binding	7	1.04322	0.00401961	IRAK3, NOD2, TNF, MYD88, TLR2, ITGB2, TGFB1	499	42	13588	4.53841	0.999955	0.0459391	6.85483
GOTERM_BP_FAT	GO:0002221~pattern recognition receptor signaling pathway	4	0.596125	0.00484299	NOD2, MYD88, TLR2, NFKBIA	499	10	13588	10.8922	0.999994	0.0529338	8.20314
GOTERM_BP_FAT	GO:0051099~positive regulation of binding	7	1.04322	0.00569152	IRAK3, NOD2, TNF, MYD88, TLR2, ITGB2, TGFB1	499	45	13588	4.23585	0.999999	0.061141	9.57338
GOTERM_BP_FAT	GO:0043330~response to exogenous dsRNA	4	0.596125	0.00840672	IRAK3, NOD2, NFKBIA, STAT1	499	12	13588	9.07682	1	0.0844388	13.8295
GOTERM_BP_FAT	GO:0002758~innate immune response-activating signal transduction	4	0.596125	0.00840672	NOD2, MYD88, TLR2, NFKBIA	499	12	13588	9.07682	1	0.0844388	13.8295
GOTERM_BP_FAT	GO:0045089~positive regulation of innate immune response	6	0.894188	0.00955792	NOD2, MYD88, STAT5A, TLR2, NFKBIA, LBP	499	36	13588	4.53841	1	0.0943545	15.5763
GOTERM_BP_FAT	GO:0002218~activation of innate immune response	4	0.596125	0.0131726	NOD2, MYD88, TLR2, NFKBIA	499	14	13588	7.78013	1	0.123121	20.8467
GOTERM_BP_FAT	GO:0070304~positive regulation of stress-activated protein kinase signaling pathway	4	0.596125	0.0191963	NOD2, TNF, MYD88, IL1B	499	16	13588	6.80762	1	0.165184	28.9462
GOTERM_BP_FAT	GO:0046330~positive regulation of JNK cascade	4	0.596125	0.0191963	NOD2, TNF, MYD88, IL1B	499	16	13588	6.80762	1	0.165184	28.9462
GOTERM_BP_FAT	GO:0043901~negative regulation of multi-organism process	3	0.447094	0.0249089	NOD2, MYD88, TLR2	499	7	13588	11.6702	1	0.199451	35.8997
GOTERM_BP_FAT	GO:0043903~regulation of symbiosis, encompassing mutualism through parasitism	3	0.447094	0.0249089	NOD2, MYD88, TLR2	499	7	13588	11.6702	1	0.199451	35.8997
GOTERM_BP_FAT	GO:0002224~toll-like receptor signaling pathway	3	0.447094	0.0249089	MYD88, TLR2, NFKBIA	499	7	13588	11.6702	1	0.199451	35.8997
GOTERM_BP_FAT	GO:0043331~response to dsRNA	4	0.596125	0.044927	IRAK3, NOD2, NFKBIA, STAT1	499	22	13588	4.95099	1	0.317741	55.5335
GOTERM_BP_FAT	GO:0045926~negative regulation of growth	4	0.596125	0.485308	NOD2, MYD88, TLR2, TGFB1	499	71	13588	1.53411	1	0.967517	99.9992
Annotation Cluster 17	Enrichment Score: 2.7065963056837354
Category	Term	Count	%	PValue	Genes	List Total	Pop Hits	Pop Total	Fold Enrichment	Bonferroni	Benjamini	FDR
GOTERM_BP_FAT	GO:0002263~cell activation during immune response	10	1.49031	1.08866e-06	SLC11A1, SBNO2, ADORA3, RELB, GADD45G, MYO1F, BCL3, LBP, ADA, LCP1	499	31	13588	8.78402	0.00270384	3.76035e-05	0.00191936
GOTERM_BP_FAT	GO:0002366~leukocyte activation during immune response	10	1.49031	1.08866e-06	SLC11A1, SBNO2, ADORA3, RELB, GADD45G, MYO1F, BCL3, LBP, ADA, LCP1	499	31	13588	8.78402	0.00270384	3.76035e-05	0.00191936
GOTERM_BP_FAT	GO:0042088~T-helper 1 type immune response	5	0.745156	0.000110954	IL18BP, RELB, GADD45G, BCL3, TLR6	499	8	13588	17.019	0.241156	0.00231629	0.195438
GOTERM_BP_FAT	GO:0002285~lymphocyte activation during immune response	6	0.894188	0.000491765	SLC11A1, RELB, GADD45G, BCL3, ADA, LCP1	499	19	13588	8.59909	0.705749	0.00834391	0.863474
GOTERM_BP_FAT	GO:0002286~T cell activation during immune response	5	0.745156	0.00133095	SLC11A1, RELB, GADD45G, BCL3, LCP1	499	14	13588	9.72516	0.963567	0.0186437	2.32075
GOTERM_BP_FAT	GO:0002275~myeloid cell activation during immune response	4	0.596125	0.00840672	SBNO2, ADORA3, MYO1F, LBP	499	12	13588	9.07682	1	0.0844388	13.8295
GOTERM_BP_FAT	GO:0046631~alpha-beta T cell activation	5	0.745156	0.00906889	ELF4, RELB, GADD45G, IRF1, BCL3	499	23	13588	5.91967	1	0.0900859	14.8384
GOTERM_BP_FAT	GO:0002294~CD4-positive, alpha-beta T cell differentiation during immune response	3	0.447094	0.0124538	RELB, GADD45G, BCL3	499	5	13588	16.3383	1	0.117211	19.8241
GOTERM_BP_FAT	GO:0042093~T-helper cell differentiation	3	0.447094	0.0124538	RELB, GADD45G, BCL3	499	5	13588	16.3383	1	0.117211	19.8241
GOTERM_BP_FAT	GO:0002293~alpha-beta T cell differentiation during immune response	3	0.447094	0.0182303	RELB, GADD45G, BCL3	499	6	13588	13.6152	1	0.158583	27.7022
GOTERM_BP_FAT	GO:0002292~T cell differentiation during immune response	3	0.447094	0.0182303	RELB, GADD45G, BCL3	499	6	13588	13.6152	1	0.158583	27.7022
GOTERM_BP_FAT	GO:0002287~alpha-beta T cell activation during immune response	3	0.447094	0.0249089	RELB, GADD45G, BCL3	499	7	13588	11.6702	1	0.199451	35.8997
GOTERM_BP_FAT	GO:0046632~alpha-beta T cell differentiation	4	0.596125	0.0306353	RELB, GADD45G, IRF1, BCL3	499	19	13588	5.73273	1	0.234906	42.2221
GOTERM_BP_FAT	GO:0043367~CD4-positive, alpha beta T cell differentiation	3	0.447094	0.0496421	RELB, GADD45G, BCL3	499	10	13588	8.16914	1	0.342495	59.249
Annotation Cluster 18	Enrichment Score: 2.703640533663327
Category	Term	Count	%	PValue	Genes	List Total	Pop Hits	Pop Total	Fold Enrichment	Bonferroni	Benjamini	FDR
GOTERM_BP_FAT	GO:0031328~positive regulation of cellular biosynthetic process	43	6.40835	5.86508e-06	TNF, ELF4, STAT5A, TLR1, TLR2, ITGB2, TLR6, GLI2, TLR7, TGFB1, GLI1, TNFRSF1A, SLC11A1, NOD2, MYD88, AGT, TEAD4, BCL3, IL1B, FAM129A, RUNX1, FGF2, FOSL1, MYC, SPN, CEBPA, ZBTB7B, ICOSL, CEBPB, IKZF1, CEBPD, AFF1, TEAD3, KLF15, STAT3, FCGR3, OSM, ETS1, CSRNP1, IRF8, IRF1, JAK3, KLF2	499	552	13588	2.12121	0.0144806	0.000167647	0.01034
GOTERM_BP_FAT	GO:0009891~positive regulation of biosynthetic process	43	6.40835	7.30022e-06	TNF, ELF4, STAT5A, TLR1, TLR2, ITGB2, TLR6, GLI2, TLR7, TGFB1, GLI1, TNFRSF1A, SLC11A1, NOD2, MYD88, AGT, TEAD4, BCL3, IL1B, FAM129A, RUNX1, FGF2, FOSL1, MYC, SPN, CEBPA, ZBTB7B, ICOSL, CEBPB, IKZF1, CEBPD, AFF1, TEAD3, KLF15, STAT3, FCGR3, OSM, ETS1, CSRNP1, IRF8, IRF1, JAK3, KLF2	499	557	13588	2.10217	0.0179919	0.00020171	0.0128699
GOTERM_BP_FAT	GO:0010604~positive regulation of macromolecule metabolic process	46	6.85544	1.55694e-05	TNF, ELF4, LRRC32, STAT5A, TLR1, TLR6, GLI2, PNP, TLR7, TGFB1, GLI1, TNFRSF1A, SLC11A1, NOD2, MYD88, TEAD4, BCL3, IL1B, FAM129A, RUNX1, FGF2, FOSL1, MYC, SPN, CEBPA, ZBTB7B, PTPRC, ICOSL, CEBPB, LYN, IKZF1, CEBPD, HCLS1, AFF1, TEAD3, KLF15, CD40, STAT3, FCGR3, OSM, ETS1, CSRNP1, IRF8, IRF1, JAK3, KLF2	499	633	13588	1.97883	0.0379812	0.000399109	0.0274461
GOTERM_BP_FAT	GO:0010557~positive regulation of macromolecule biosynthetic process	39	5.81222	6.06726e-05	TNF, ELF4, STAT5A, TLR1, TLR6, GLI2, TLR7, TGFB1, GLI1, TNFRSF1A, SLC11A1, MYD88, TEAD4, BCL3, IL1B, FAM129A, RUNX1, FGF2, FOSL1, MYC, SPN, CEBPA, ZBTB7B, ICOSL, CEBPB, IKZF1, CEBPD, AFF1, TEAD3, KLF15, STAT3, FCGR3, OSM, ETS1, CSRNP1, IRF8, IRF1, JAK3, KLF2	499	530	13588	2.00375	0.140064	0.00134639	0.106915
GOTERM_BP_FAT	GO:0051173~positive regulation of nitrogen compound metabolic process	36	5.36513	0.000489892	TNF, ELF4, STAT5A, TLR2, ITGB2, GLI2, PNP, TGFB1, GLI1, TNFRSF1A, SLC11A1, MYD88, TEAD4, BCL3, RUNX1, FGF2, FOSL1, MYC, CEBPA, ZBTB7B, PTPRC, CEBPB, IKZF1, CEBPD, AFF1, TEAD3, KLF15, CD40, STAT3, OSM, ETS1, CSRNP1, IRF8, IRF1, JAK3, KLF2	499	526	13588	1.86368	0.704374	0.00836934	0.860199
GOTERM_BP_FAT	GO:0045893~positive regulation of transcription, DNA-dependent	30	4.47094	0.000712334	TNF, ELF4, STAT5A, GLI2, TGFB1, GLI1, SLC11A1, TNFRSF1A, MYD88, TEAD4, BCL3, RUNX1, FGF2, FOSL1, MYC, CEBPA, ZBTB7B, CEBPB, IKZF1, CEBPD, AFF1, TEAD3, KLF15, STAT3, OSM, ETS1, CSRNP1, IRF8, IRF1, JAK3	499	416	13588	1.96374	0.830042	0.0114419	1.24847
GOTERM_BP_FAT	GO:0045944~positive regulation of transcription from RNA polymerase II promoter	27	4.02385	0.0007217	TNF, ELF4, STAT5A, GLI2, TGFB1, GLI1, SLC11A1, TNFRSF1A, MYD88, TEAD4, BCL3, RUNX1, FGF2, MYC, FOSL1, CEBPA, ZBTB7B, CEBPB, IKZF1, CEBPD, TEAD3, STAT3, OSM, ETS1, CSRNP1, IRF1, JAK3	499	358	13588	2.05369	0.833958	0.0115171	1.26479
GOTERM_BP_FAT	GO:0051254~positive regulation of RNA metabolic process	30	4.47094	0.000796787	TNF, ELF4, STAT5A, GLI2, TGFB1, GLI1, SLC11A1, TNFRSF1A, MYD88, TEAD4, BCL3, RUNX1, FGF2, FOSL1, MYC, CEBPA, ZBTB7B, CEBPB, IKZF1, CEBPD, AFF1, TEAD3, KLF15, STAT3, OSM, ETS1, CSRNP1, IRF8, IRF1, JAK3	499	419	13588	1.94968	0.862261	0.0124684	1.39551
GOTERM_BP_FAT	GO:0045935~positive regulation of nucleobase, nucleoside, nucleotide and nucleic acid metabolic process	34	5.06706	0.00112905	TNF, ELF4, STAT5A, GLI2, PNP, TGFB1, GLI1, TNFRSF1A, SLC11A1, MYD88, TEAD4, BCL3, RUNX1, FGF2, FOSL1, MYC, CEBPA, ZBTB7B, PTPRC, CEBPB, IKZF1, CEBPD, AFF1, TEAD3, KLF15, CD40, STAT3, OSM, ETS1, CSRNP1, IRF8, IRF1, JAK3, KLF2	499	510	13588	1.81536	0.939767	0.016487	1.972
GOTERM_BP_FAT	GO:0010628~positive regulation of gene expression	32	4.769	0.0021265	TNF, ELF4, LRRC32, STAT5A, GLI2, TGFB1, GLI1, TNFRSF1A, SLC11A1, MYD88, TEAD4, BCL3, RUNX1, FGF2, FOSL1, MYC, CEBPA, ZBTB7B, CEBPB, IKZF1, CEBPD, AFF1, TEAD3, KLF15, STAT3, OSM, ETS1, CSRNP1, IRF8, IRF1, JAK3, KLF2	499	488	13588	1.7856	0.99498	0.0280623	3.68357
GOTERM_BP_FAT	GO:0045941~positive regulation of transcription	31	4.61997	0.00269349	TNF, ELF4, STAT5A, GLI2, TGFB1, GLI1, TNFRSF1A, SLC11A1, MYD88, TEAD4, BCL3, RUNX1, FGF2, FOSL1, MYC, CEBPA, ZBTB7B, CEBPB, IKZF1, CEBPD, AFF1, TEAD3, KLF15, STAT3, OSM, ETS1, CSRNP1, IRF8, IRF1, JAK3, KLF2	499	475	13588	1.77715	0.998779	0.0336443	4.6439
GOTERM_BP_FAT	GO:0006357~regulation of transcription from RNA polymerase II promoter	35	5.2161	0.011511	TNF, ELF4, STAT5A, GLI2, TGFB1, GLI1, SAP30, TNFRSF1A, SLC11A1, MYD88, TEAD4, BCL3, RUNX1, FGF2, FOSL1, MYC, CEBPA, TXNIP, ZBTB7B, MDFI, CEBPB, IKZF1, CEBPD, TEAD3, STAT3, ZBTB42, OSM, TIMELESS, ETS1, CSRNP1, IRF1, BCL6B, TGIF1, JAK3, IFI204	499	616	13588	1.54719	1	0.109618	18.4638
GOTERM_BP_FAT	GO:0051252~regulation of RNA metabolic process	60	8.94188	0.277701	APOBEC1, ELF4, STAT5A, NFKB2, GLI2, TGFB1, GLI1, BATF, SAP30, MYD88, FGF2, FOSL1, MYC, ZFP36, BATF3, BATF2, RELB, OSM, TIMELESS, TGIF1, GM13154, SBNO2, TNF, NOSTRIN, TNFRSF1A, SLC11A1, TNFRSF1B, TSC22D4, TEAD4, BCL3, RUNX1, MDFI, TXNIP, CEBPA, ZBTB7B, MAFF, NFE2, CEBPB, IKZF1, CEBPD, AFF1, KLF15, TEAD3, STAT1, MAFK, STAT3, ZBTB42, STAT2, IRF9, ATF3, ETS1, IRF7, CSRNP1, IRF8, HIF3A, IRF1, BCL6B, J…	499	1488	13588	1.098	1	0.854987	99.6771
GOTERM_BP_FAT	GO:0006355~regulation of transcription, DNA-dependent	57	8.49478	0.399607	ELF4, STAT5A, NFKB2, GLI2, TGFB1, GLI1, BATF, SAP30, MYD88, FGF2, FOSL1, MYC, BATF3, BATF2, RELB, OSM, TIMELESS, TGIF1, GM13154, SBNO2, TNF, NOSTRIN, TNFRSF1A, SLC11A1, TSC22D4, TEAD4, BCL3, RUNX1, TXNIP, MDFI, CEBPA, ZBTB7B, MAFF, NFE2, CEBPB, IKZF1, CEBPD, AFF1, KLF15, TEAD3, STAT1, MAFK, STAT3, ZBTB42, STAT2, IRF9, ATF3, ETS1, IRF7, CSRNP1, IRF8, HIF3A, IRF1, BCL6B, JAK3, ZFP189, IFI204	499	1465	13588	1.05948	1	0.937357	99.9876
GOTERM_BP_FAT	GO:0045449~regulation of transcription	75	11.1773	0.841752	AKNA, ELF4, STAT5A, TLR2, PDLIM1, NFKB2, GLI2, TGFB1, GLI1, BATF, MAMSTR, SAP30, NOD2, MYD88, FGF2, FOSL1, MYC, BATF3, NFKBIZ, BATF2, RELB, ARID5A, NLRP3, OSM, UHRF1, TIMELESS, PARP14, TGIF1, GM13154, SBNO2, TNF, NFKBIA, TRIB3, ITGB2, NOSTRIN, IRAK3, SLC11A1, TNFRSF1A, TSC22D4, TEAD4, BCL3, RUNX1, ZBTB7B, MDFI, TXNIP, CEBPA, MAFF, CEBPB, NFE2, IKZF1, CEBPD, AFF1, TEAD3, KLF15, STAT1, MAFK, STAT3,…	499	2227	13588	0.917056	1	0.999705	100
GOTERM_BP_FAT	GO:0006350~transcription	52	7.74963	0.977671	AKNA, ELF4, STAT5A, NFKB2, GLI1, BATF, MAMSTR, SAP30, MYC, BATF3, NFKBIZ, RELB, ARID5A, UHRF1, TIMELESS, PARP14, TGIF1, GM13154, SBNO2, TRIB3, TSC22D4, TEAD4, BCL3, RUNX1, TXNIP, CEBPA, ZBTB7B, MAFF, NFE2, CEBPB, IKZF1, CEBPD, AFF1, KLF15, TEAD3, STAT1, MAFK, STAT3, STAT2, IRF9, ATF3, ETS1, IRF7, CSRNP1, NOTCH4, IRF8, HIF3A, IRF1, AIRE, KLF2, ZFP189, IFI204	499	1772	13588	0.799088	1	1	100
Annotation Cluster 19	Enrichment Score: 2.5449076019327994
Category	Term	Count	%	PValue	Genes	List Total	Pop Hits	Pop Total	Fold Enrichment	Bonferroni	Benjamini	FDR
GOTERM_BP_FAT	GO:0002685~regulation of leukocyte migration	6	0.894188	3.31244e-06	SELP, NOD2, ADORA3, TLR2, SELE, ADA	499	8	13588	20.4228	0.00820421	0.000101699	0.00583986
GOTERM_BP_FAT	GO:0002687~positive regulation of leukocyte migration	4	0.596125	0.000463075	SELP, ADORA3, TLR2, SELE	499	5	13588	21.7844	0.683975	0.0080794	0.813292
GOTERM_BP_FAT	GO:0051270~regulation of cell motion	11	1.63934	0.00585047	B4GALT1, SELP, NOD2, ADORA3, CSF1, ROBO4, TLR2, MYO1F, ARAP3, SELE, ADA	499	107	13588	2.79939	1	0.062263	9.8279
GOTERM_BP_FAT	GO:0030334~regulation of cell migration	10	1.49031	0.00651111	SELP, NOD2, ADORA3, CSF1, ROBO4, TLR2, MYO1F, ARAP3, SELE, ADA	499	92	13588	2.95983	1	0.0681982	10.8785
GOTERM_BP_FAT	GO:0030335~positive regulation of cell migration	6	0.894188	0.0107266	SELP, ADORA3, CSF1, TLR2, MYO1F, SELE	499	37	13588	4.41575	1	0.103296	17.3155
GOTERM_BP_FAT	GO:0051272~positive regulation of cell motion	6	0.894188	0.0163727	SELP, ADORA3, CSF1, TLR2, MYO1F, SELE	499	41	13588	3.98495	1	0.146592	25.2522
GOTERM_BP_FAT	GO:0040012~regulation of locomotion	10	1.49031	0.0196278	SELP, NOD2, ADORA3, CSF1, ROBO4, TLR2, MYO1F, ARAP3, SELE, ADA	499	110	13588	2.4755	1	0.167457	29.4953
GOTERM_BP_FAT	GO:0040017~positive regulation of locomotion	6	0.894188	0.0217089	SELP, ADORA3, CSF1, TLR2, MYO1F, SELE	499	44	13588	3.71324	1	0.181223	32.0879
Annotation Cluster 20	Enrichment Score: 2.3809830733442117
Category	Term	Count	%	PValue	Genes	List Total	Pop Hits	Pop Total	Fold Enrichment	Bonferroni	Benjamini	FDR
GOTERM_BP_FAT	GO:0032675~regulation of interleukin-6 production	11	1.63934	1.2465e-07	IRAK3, NOD2, TNF, MYD88, CEBPB, TLR1, TLR2, FCER1G, IL1B, TLR6, TLR7	499	32	13588	9.36047	0.000309957	5.53579e-06	0.000219765
GOTERM_BP_FAT	GO:0032755~positive regulation of interleukin-6 production	7	1.04322	2.99675e-05	NOD2, TNF, MYD88, TLR2, FCER1G, IL1B, TLR7	499	18	13588	10.5896	0.0718207	0.000716381	0.0528213
GOTERM_BP_FAT	GO:0001932~regulation of protein amino acid phosphorylation	15	2.23547	0.000136613	MDFI, PTPRC, PTPN6, TNF, LYN, SOCS3, HCLS1, TLR6, OSM, NOD2, APOA1, FAM129A, IGFBP3, FGF2, CBS	499	121	13588	3.37568	0.288074	0.00278121	0.240584
GOTERM_BP_FAT	GO:0010740~positive regulation of protein kinase cascade	12	1.78838	0.000358239	OSM, PTPRC, NOD2, ADORA3, TNF, MYD88, LYN, AGT, HCLS1, TGM2, IL1B, TLR6	499	88	13588	3.71324	0.589795	0.00643644	0.629718
GOTERM_BP_FAT	GO:0010627~regulation of protein kinase cascade	15	2.23547	0.00168467	MDFI, PTPRC, PTPN6, TNF, ADORA3, LYN, HCLS1, TLR6, OSM, NOD2, MYD88, AGT, TGM2, IL1B, CBS	499	155	13588	2.63521	0.984904	0.0229012	2.92893
GOTERM_BP_FAT	GO:0043408~regulation of MAPKKK cascade	11	1.63934	0.00211578	OSM, MDFI, PTPN6, PTPRC, NOD2, TNF, MYD88, AGT, IL1B, TLR6, CBS	499	93	13588	3.22081	0.994844	0.0280716	3.66534
GOTERM_BP_FAT	GO:0009967~positive regulation of signal transduction	15	2.23547	0.0043812	ITGAL, PTPRC, TNF, ADORA3, LYN, CSF1, HCLS1, TLR6, ADA, OSM, NOD2, MYD88, AGT, TGM2, IL1B	499	172	13588	2.37475	0.999982	0.0488578	7.44923
GOTERM_BP_FAT	GO:0046328~regulation of JNK cascade	7	1.04322	0.00569152	MDFI, NOD2, TNF, MYD88, IL1B, TLR6, CBS	499	45	13588	4.23585	0.999999	0.061141	9.57338
GOTERM_BP_FAT	GO:0070302~regulation of stress-activated protein kinase signaling pathway	7	1.04322	0.00634748	MDFI, NOD2, TNF, MYD88, IL1B, TLR6, CBS	499	46	13588	4.14377	1	0.066818	10.6194
GOTERM_BP_FAT	GO:0043123~positive regulation of I-kappaB kinase/NF-kappaB cascade	6	0.894188	0.00658164	NOD2, TNF, MYD88, TGM2, IL1B, TLR6	499	33	13588	4.95099	1	0.0686254	10.99
GOTERM_BP_FAT	GO:0043410~positive regulation of MAPKKK cascade	7	1.04322	0.00705669	OSM, PTPRC, NOD2, TNF, MYD88, AGT, IL1B	499	47	13588	4.0556	1	0.0731047	11.7375
GOTERM_BP_FAT	GO:0010647~positive regulation of cell communication	15	2.23547	0.00984202	ITGAL, PTPRC, TNF, ADORA3, LYN, CSF1, HCLS1, TLR6, ADA, OSM, NOD2, MYD88, AGT, TGM2, IL1B	499	189	13588	2.16115	1	0.0966508	16.0022
GOTERM_BP_FAT	GO:0043122~regulation of I-kappaB kinase/NF-kappaB cascade	6	0.894188	0.0148094	NOD2, TNF, MYD88, TGM2, IL1B, TLR6	499	40	13588	4.08457	1	0.135423	23.1297
GOTERM_BP_FAT	GO:0070304~positive regulation of stress-activated protein kinase signaling pathway	4	0.596125	0.0191963	NOD2, TNF, MYD88, IL1B	499	16	13588	6.80762	1	0.165184	28.9462
GOTERM_BP_FAT	GO:0046330~positive regulation of JNK cascade	4	0.596125	0.0191963	NOD2, TNF, MYD88, IL1B	499	16	13588	6.80762	1	0.165184	28.9462
GOTERM_BP_FAT	GO:0080135~regulation of cellular response to stress	8	1.19225	0.019781	MDFI, NOD2, TNF, MYD88, IL1B, TLR6, PNP, CBS	499	75	13588	2.90458	1	0.16809	29.6893
GOTERM_BP_FAT	GO:0032642~regulation of chemokine production	3	0.447094	0.0592338	NOD2, MYD88, IL1B	499	11	13588	7.42649	1	0.385363	65.9225
GOTERM_BP_FAT	GO:0031098~stress-activated protein kinase signaling pathway	4	0.596125	0.135593	MDFI, TNF, MYD88, ERRFI1	499	35	13588	3.11205	1	0.633529	92.3386
GOTERM_BP_FAT	GO:0043506~regulation of JUN kinase activity	3	0.447094	0.178665	MDFI, TLR6, CBS	499	21	13588	3.89007	1	0.721427	96.8887
GOTERM_BP_FAT	GO:0007254~JNK cascade	3	0.447094	0.328725	MDFI, TNF, MYD88	499	32	13588	2.55286	1	0.896515	99.9113
Annotation Cluster 21	Enrichment Score: 2.2837980210357576
Category	Term	Count	%	PValue	Genes	List Total	Pop Hits	Pop Total	Fold Enrichment	Bonferroni	Benjamini	FDR
GOTERM_BP_FAT	GO:0035295~tube development	22	3.27869	0.000724323	CEBPA, B4GALT1, CSF1, MGP, GLI2, ADA, VASP, TGFB1, GLI1, ADM, TIMELESS, CD44, CRISPLD2, AGT, NOTCH4, CASP8, TGM2, TGIF1, NOS3, LOX, FGF2, TES	499	264	13588	2.26921	0.835039	0.0114851	1.26936
GOTERM_BP_FAT	GO:0030324~lung development	11	1.63934	0.00754374	CEBPA, TIMELESS, CRISPLD2, MGP, NOS3, LOX, GLI2, FGF2, ADA, TES, GLI1	499	111	13588	2.69851	1	0.0776456	12.4977
GOTERM_BP_FAT	GO:0030323~respiratory tube development	11	1.63934	0.00852094	CEBPA, TIMELESS, CRISPLD2, MGP, NOS3, LOX, GLI2, FGF2, ADA, TES, GLI1	499	113	13588	2.65075	1	0.085198	14.0043
GOTERM_BP_FAT	GO:0060541~respiratory system development	11	1.63934	0.0157326	CEBPA, TIMELESS, CRISPLD2, MGP, NOS3, LOX, GLI2, FGF2, ADA, TES, GLI1	499	124	13588	2.41561	1	0.142775	24.3899
Annotation Cluster 22	Enrichment Score: 2.2638092887294348
Category	Term	Count	%	PValue	Genes	List Total	Pop Hits	Pop Total	Fold Enrichment	Bonferroni	Benjamini	FDR
GOTERM_BP_FAT	GO:0002764~immune response-regulating signal transduction	11	1.63934	1.58096e-05	PTPN6, PTPRC, BCL2A1D, NOD2, MYD88, LYN, IL20RB, TLR2, FCER1G, NFKBIA, CD40	499	52	13588	5.76029	0.0385558	0.000401131	0.0278695
GOTERM_BP_FAT	GO:0002757~immune response-activating signal transduction	9	1.34128	0.000318891	PTPN6, PTPRC, BCL2A1D, NOD2, MYD88, LYN, TLR2, FCER1G, NFKBIA	499	48	13588	5.10571	0.547609	0.00581544	0.560735
GOTERM_BP_FAT	GO:0002920~regulation of humoral immune response	5	0.745156	0.000697762	PTPN6, PTPRC, NOD2, CFH, SERPING1	499	12	13588	11.346	0.823765	0.0112819	1.22308
GOTERM_BP_FAT	GO:0002768~immune response-regulating cell surface receptor signaling pathway	7	1.04322	0.00508647	PTPN6, PTPRC, BCL2A1D, LYN, TLR2, FCER1G, CD40	499	44	13588	4.33212	0.999997	0.0552845	8.59831
GOTERM_BP_FAT	GO:0002429~immune response-activating cell surface receptor signaling pathway	6	0.894188	0.0163727	PTPN6, PTPRC, BCL2A1D, LYN, TLR2, FCER1G	499	41	13588	3.98495	1	0.146592	25.2522
GOTERM_BP_FAT	GO:0002923~regulation of humoral immune response mediated by circulating immunoglobulin	3	0.447094	0.0249089	PTPN6, PTPRC, NOD2	499	7	13588	11.6702	1	0.199451	35.8997
GOTERM_BP_FAT	GO:0050730~regulation of peptidyl-tyrosine phosphorylation	6	0.894188	0.0440168	OSM, PTPN6, PTPRC, NOD2, LYN, HCLS1	499	53	13588	3.08269	1	0.314045	54.7804
GOTERM_BP_FAT	GO:0050853~B cell receptor signaling pathway	3	0.447094	0.0912354	PTPN6, PTPRC, LYN	499	14	13588	5.8351	1	0.506396	81.4871
GOTERM_BP_FAT	GO:0050851~antigen receptor-mediated signaling pathway	4	0.596125	0.144136	PTPN6, PTPRC, BCL2A1D, LYN	499	36	13588	3.02561	1	0.653721	93.5693
Annotation Cluster 23	Enrichment Score: 2.2590291046641875
Category	Term	Count	%	PValue	Genes	List Total	Pop Hits	Pop Total	Fold Enrichment	Bonferroni	Benjamini	FDR
GOTERM_BP_FAT	GO:0044092~negative regulation of molecular function	18	2.68256	6.45477e-06	MDFI, CFLAR, PTPRC, PTPN6, TRIB3, NFKBIA, NLRP3, IRAK3, BCL2A1D, CDKN1A, NOD2, APOA1, GADD45G, IL1B, FABP4, NOS3, MYC, ANGPTL4	499	132	13588	3.71324	0.0159249	0.000182405	0.0113795
GOTERM_BP_FAT	GO:0042325~regulation of phosphorylation	26	3.87481	6.66645e-05	TNF, CSF1, TLR1, TRIB3, TLR6, TRIB1, SLC11A1, IRAK3, NOD2, APOA1, IL1B, FAM129A, FGF2, MDFI, PTPRC, PTPN6, LYN, SOCS3, HCLS1, OSM, CDKN1A, PLCE1, GADD45G, FABP4, IGFBP3, CBS	499	290	13588	2.44135	0.152784	0.00145333	0.117468
GOTERM_BP_FAT	GO:0019220~regulation of phosphate metabolic process	26	3.87481	0.000120801	TNF, CSF1, TLR1, TRIB3, TLR6, TRIB1, SLC11A1, IRAK3, NOD2, APOA1, IL1B, FAM129A, FGF2, MDFI, PTPRC, PTPN6, LYN, SOCS3, HCLS1, OSM, CDKN1A, PLCE1, GADD45G, FABP4, IGFBP3, CBS	499	301	13588	2.35213	0.259515	0.00250062	0.212765
GOTERM_BP_FAT	GO:0051174~regulation of phosphorus metabolic process	26	3.87481	0.000120801	TNF, CSF1, TLR1, TRIB3, TLR6, TRIB1, SLC11A1, IRAK3, NOD2, APOA1, IL1B, FAM129A, FGF2, MDFI, PTPRC, PTPN6, LYN, SOCS3, HCLS1, OSM, CDKN1A, PLCE1, GADD45G, FABP4, IGFBP3, CBS	499	301	13588	2.35213	0.259515	0.00250062	0.212765
GOTERM_BP_FAT	GO:0043086~negative regulation of catalytic activity	13	1.93741	0.00031627	PTPRC, PTPN6, CFLAR, TRIB3, IRAK3, CDKN1A, BCL2A1D, APOA1, GADD45G, IL1B, FABP4, NOS3, ANGPTL4	499	101	13588	3.50491	0.544649	0.00581036	0.556137
GOTERM_BP_FAT	GO:0051338~regulation of transferase activity	18	2.68256	0.00105446	MDFI, PTPN6, PTPRC, CSF1, TLR1, TRIB3, TLR6, TRIB1, IRAK3, SLC11A1, PLCE1, CDKN1A, APOA1, GADD45G, IL1B, FABP4, FGF2, CBS	499	199	13588	2.46306	0.927475	0.0155887	1.84286
GOTERM_BP_FAT	GO:0045859~regulation of protein kinase activity	17	2.53353	0.0013621	MDFI, PTPN6, PTPRC, CSF1, TLR1, TRIB3, TLR6, TRIB1, IRAK3, SLC11A1, PLCE1, CDKN1A, GADD45G, IL1B, FABP4, FGF2, CBS	499	186	13588	2.48881	0.966287	0.0189695	2.37446
GOTERM_BP_FAT	GO:0043549~regulation of kinase activity	17	2.53353	0.00189275	MDFI, PTPN6, PTPRC, CSF1, TLR1, TRIB3, TLR6, TRIB1, IRAK3, SLC11A1, PLCE1, CDKN1A, GADD45G, IL1B, FABP4, FGF2, CBS	499	192	13588	2.41103	0.991011	0.0254185	3.28502
GOTERM_BP_FAT	GO:0033673~negative regulation of kinase activity	8	1.19225	0.00243691	PTPN6, PTPRC, IRAK3, CDKN1A, GADD45G, FABP4, IL1B, TRIB3	499	51	13588	4.27144	0.997684	0.0312703	4.21045
GOTERM_BP_FAT	GO:0006469~negative regulation of protein kinase activity	8	1.19225	0.00243691	PTPN6, PTPRC, IRAK3, CDKN1A, GADD45G, FABP4, IL1B, TRIB3	499	51	13588	4.27144	0.997684	0.0312703	4.21045
GOTERM_BP_FAT	GO:0007243~protein kinase cascade	19	2.83159	0.00270356	ZFP36, MDFI, PTPRC, TNF, PLEK, STAT5A, TLR1, TIFA, TLR6, STAT3, OSM, SLC11A1, PLCE1, MYD88, NOTCH4, GADD45G, RIPK3, JAK3, FGF2	499	236	13588	2.19228	0.998809	0.0335995	4.66087
GOTERM_BP_FAT	GO:0051348~negative regulation of transferase activity	8	1.19225	0.00304713	PTPN6, PTPRC, IRAK3, CDKN1A, GADD45G, FABP4, IL1B, TRIB3	499	53	13588	4.11026	0.999494	0.0368761	5.23829
GOTERM_BP_FAT	GO:0043405~regulation of MAP kinase activity	10	1.49031	0.00356464	MDFI, PTPN6, PTPRC, IRAK3, PLCE1, IL1B, TRIB3, TLR6, TRIB1, CBS	499	84	13588	3.24172	0.999861	0.0416031	6.1018
GOTERM_BP_FAT	GO:0044093~positive regulation of molecular function	22	3.27869	0.00442245	MDFI, PTPRC, ADCY4, TNF, CSF1, TLR1, TLR2, ITGB2, NLRP3, TLR6, TGFB1, IRAK3, SLC11A1, NOD2, PLCE1, APOA1, MYD88, GADD45G, PYCARD, TGM2, FGF2, MYC	499	306	13588	1.95775	0.999984	0.0490877	7.5168
GOTERM_BP_FAT	GO:0051347~positive regulation of transferase activity	10	1.49031	0.060199	MDFI, PTPRC, SLC11A1, PLCE1, APOA1, CSF1, GADD45G, TLR1, TLR6, FGF2	499	135	13588	2.01707	1	0.388447	66.5337
GOTERM_BP_FAT	GO:0045860~positive regulation of protein kinase activity	9	1.34128	0.0854793	MDFI, PTPRC, SLC11A1, PLCE1, CSF1, GADD45G, TLR1, TLR6, FGF2	499	124	13588	1.9764	1	0.487962	79.3072
GOTERM_BP_FAT	GO:0043085~positive regulation of catalytic activity	15	2.23547	0.100281	MDFI, ADCY4, PTPRC, CSF1, TLR1, NLRP3, TLR6, SLC11A1, PLCE1, APOA1, GADD45G, PYCARD, TGM2, MYC, FGF2	499	261	13588	1.56497	1	0.536267	84.4806
GOTERM_BP_FAT	GO:0033674~positive regulation of kinase activity	9	1.34128	0.104983	MDFI, PTPRC, SLC11A1, PLCE1, CSF1, GADD45G, TLR1, TLR6, FGF2	499	130	13588	1.88519	1	0.549423	85.85
GOTERM_BP_FAT	GO:0032147~activation of protein kinase activity	5	0.745156	0.116111	SLC11A1, GADD45G, TLR1, TLR6, FGF2	499	51	13588	2.66965	1	0.581898	88.6509
GOTERM_BP_FAT	GO:0000165~MAPKKK cascade	8	1.19225	0.125277	MDFI, PTPRC, SLC11A1, PLCE1, TNF, MYD88, GADD45G, FGF2	499	114	13588	1.91091	1	0.607437	90.5563
GOTERM_BP_FAT	GO:0043407~negative regulation of MAP kinase activity	3	0.447094	0.165445	PTPN6, IRAK3, IL1B	499	20	13588	4.08457	1	0.696714	95.8771
GOTERM_BP_FAT	GO:0043406~positive regulation of MAP kinase activity	4	0.596125	0.368043	MDFI, PTPRC, PLCE1, TLR6	499	59	13588	1.84613	1	0.921738	99.9694
GOTERM_BP_FAT	GO:0000187~activation of MAPK activity	3	0.447094	0.551761	MDFI, PTPRC, PLCE1	499	50	13588	1.63383	1	0.980628	99.9999
Annotation Cluster 24	Enrichment Score: 2.2139510696102542
Category	Term	Count	%	PValue	Genes	List Total	Pop Hits	Pop Total	Fold Enrichment	Bonferroni	Benjamini	FDR
GOTERM_BP_FAT	GO:0007155~cell adhesion	35	5.2161	0.00284462	PVR, ITGAL, SIGLECE, FERMT3, ITGB2, ITGAM, CDH5, VCAM1, LGALS3BP, CD44, CD93, AGT, TGFBI, ESAM, AMICA1, CYR61, THBS4, B4GALT1, PTPRC, ICAM1, F11R, SELP, PLEK, EMILIN2, COL5A3, COL16A1, EMILIN1, SIGLEC1, VWF, ITGA6, STAB1, ITGA5, CD33, CDH19, SELE	499	561	13588	1.69887	0.999162	0.034975	4.89834
GOTERM_BP_FAT	GO:0022610~biological adhesion	35	5.2161	0.00293909	PVR, ITGAL, SIGLECE, FERMT3, ITGB2, ITGAM, CDH5, VCAM1, LGALS3BP, CD44, CD93, AGT, TGFBI, ESAM, AMICA1, CYR61, THBS4, B4GALT1, PTPRC, ICAM1, F11R, SELP, PLEK, EMILIN2, COL5A3, COL16A1, EMILIN1, SIGLEC1, VWF, ITGA6, STAB1, ITGA5, CD33, CDH19, SELE	499	562	13588	1.69585	0.999338	0.0357641	5.05707
GOTERM_BP_FAT	GO:0016337~cell-cell adhesion	16	2.3845	0.0272841	PVR, SELP, ITGAL, ICAM1, PTPRC, PLEK, ITGB2, CDH5, ITGAM, VCAM1, ITGA6, CD93, ITGA5, CDH19, ESAM, CYR61	499	236	13588	1.84613	1	0.214471	38.5974
Annotation Cluster 25	Enrichment Score: 2.128008806635689
Category	Term	Count	%	PValue	Genes	List Total	Pop Hits	Pop Total	Fold Enrichment	Bonferroni	Benjamini	FDR
GOTERM_BP_FAT	GO:0010033~response to organic substance	34	5.06706	0.000952058	CYP1B1, STAT5A, TLR1, TLR2, NFKBIA, TGFB1, B2M, IRAK3, SLC11A1, NOD2, EIF4EBP1, MYD88, TAP2, IL1B, FAS, LBP, MYC, CYR61, TES, SGK1, C5AR1, LYN, HCLS1, MGP, CLIC1, STAT1, STAT3, SERPINA3N, SERPINA3H, SERPINA3G, SERPINA3I, MC4R, FABP4, EIF2AK2, CD14	499	505	13588	1.83334	0.906416	0.014428	1.66531
GOTERM_BP_FAT	GO:0009725~response to hormone stimulus	14	2.08644	0.00773304	SGK1, LYN, HCLS1, STAT5A, MGP, STAT3, SERPINA3N, EIF4EBP1, SERPINA3H, SERPINA3G, SERPINA3I, MC4R, FABP4, FAS, TES	499	165	13588	2.31046	1	0.0785516	12.7915
GOTERM_BP_FAT	GO:0009719~response to endogenous stimulus	14	2.08644	0.0180384	SGK1, LYN, HCLS1, STAT5A, MGP, STAT3, SERPINA3N, EIF4EBP1, SERPINA3H, SERPINA3G, SERPINA3I, MC4R, FABP4, FAS, TES	499	184	13588	2.07188	1	0.158686	27.4526
GOTERM_BP_FAT	GO:0043434~response to peptide hormone stimulus	9	1.34128	0.0231608	SGK1, EIF4EBP1, SERPINA3N, SERPINA3H, SERPINA3G, STAT5A, SERPINA3I, MC4R, STAT3, TES	499	95	13588	2.57973	1	0.18912	33.8431
Annotation Cluster 26	Enrichment Score: 2.109930412564537
Category	Term	Count	%	PValue	Genes	List Total	Pop Hits	Pop Total	Fold Enrichment	Bonferroni	Benjamini	FDR
GOTERM_BP_FAT	GO:0002444~myeloid leukocyte mediated immunity	5	0.745156	0.00289978	ADORA3, NCF1, MYO1F, FCGR1, FCGR3	499	17	13588	8.00896	0.99927	0.0354669	4.99104
GOTERM_BP_FAT	GO:0001909~leukocyte mediated cytotoxicity	4	0.596125	0.00840672	PTPN6, NCF1, FCGR1, FCGR3	499	12	13588	9.07682	1	0.0844388	13.8295
GOTERM_BP_FAT	GO:0001906~cell killing	4	0.596125	0.0191963	PTPN6, NCF1, FCGR1, FCGR3	499	16	13588	6.80762	1	0.165184	28.9462
Annotation Cluster 27	Enrichment Score: 1.9677136505300254
Category	Term	Count	%	PValue	Genes	List Total	Pop Hits	Pop Total	Fold Enrichment	Bonferroni	Benjamini	FDR
GOTERM_BP_FAT	GO:0042325~regulation of phosphorylation	26	3.87481	6.66645e-05	TNF, CSF1, TLR1, TRIB3, TLR6, TRIB1, SLC11A1, IRAK3, NOD2, APOA1, IL1B, FAM129A, FGF2, MDFI, PTPRC, PTPN6, LYN, SOCS3, HCLS1, OSM, CDKN1A, PLCE1, GADD45G, FABP4, IGFBP3, CBS	499	290	13588	2.44135	0.152784	0.00145333	0.117468
GOTERM_BP_FAT	GO:0019220~regulation of phosphate metabolic process	26	3.87481	0.000120801	TNF, CSF1, TLR1, TRIB3, TLR6, TRIB1, SLC11A1, IRAK3, NOD2, APOA1, IL1B, FAM129A, FGF2, MDFI, PTPRC, PTPN6, LYN, SOCS3, HCLS1, OSM, CDKN1A, PLCE1, GADD45G, FABP4, IGFBP3, CBS	499	301	13588	2.35213	0.259515	0.00250062	0.212765
GOTERM_BP_FAT	GO:0051174~regulation of phosphorus metabolic process	26	3.87481	0.000120801	TNF, CSF1, TLR1, TRIB3, TLR6, TRIB1, SLC11A1, IRAK3, NOD2, APOA1, IL1B, FAM129A, FGF2, MDFI, PTPRC, PTPN6, LYN, SOCS3, HCLS1, OSM, CDKN1A, PLCE1, GADD45G, FABP4, IGFBP3, CBS	499	301	13588	2.35213	0.259515	0.00250062	0.212765
GOTERM_BP_FAT	GO:0001932~regulation of protein amino acid phosphorylation	15	2.23547	0.000136613	MDFI, PTPRC, PTPN6, TNF, LYN, SOCS3, HCLS1, TLR6, OSM, NOD2, APOA1, FAM129A, IGFBP3, FGF2, CBS	499	121	13588	3.37568	0.288074	0.00278121	0.240584
GOTERM_BP_FAT	GO:0031399~regulation of protein modification process	16	2.3845	0.00109377	MDFI, PTPN6, PTPRC, TNF, LYN, SOCS3, HCLS1, TLR6, TGFB1, OSM, NOD2, APOA1, FAM129A, IGFBP3, FGF2, CBS	499	165	13588	2.64053	0.934237	0.0160701	1.91095
GOTERM_BP_FAT	GO:0010627~regulation of protein kinase cascade	15	2.23547	0.00168467	MDFI, PTPRC, PTPN6, TNF, ADORA3, LYN, HCLS1, TLR6, OSM, NOD2, MYD88, AGT, TGM2, IL1B, CBS	499	155	13588	2.63521	0.984904	0.0229012	2.92893
GOTERM_BP_FAT	GO:0032268~regulation of cellular protein metabolic process	18	2.68256	0.0290308	MDFI, PTPN6, PTPRC, TNF, LYN, SOCS3, HCLS1, SERPING1, TLR6, TGFB1, OSM, EIF4EBP1, NOD2, APOA1, FAM129A, IGFBP3, FGF2, CBS	499	280	13588	1.75053	1	0.224622	40.5127
GOTERM_BP_FAT	GO:0050730~regulation of peptidyl-tyrosine phosphorylation	6	0.894188	0.0440168	OSM, PTPN6, PTPRC, NOD2, LYN, HCLS1	499	53	13588	3.08269	1	0.314045	54.7804
GOTERM_BP_FAT	GO:0001934~positive regulation of protein amino acid phosphorylation	6	0.894188	0.0536734	OSM, NOD2, LYN, HCLS1, FAM129A, FGF2	499	56	13588	2.91755	1	0.360399	62.1915
GOTERM_BP_FAT	GO:0031401~positive regulation of protein modification process	7	1.04322	0.0661381	OSM, NOD2, LYN, HCLS1, FAM129A, FGF2, TGFB1	499	78	13588	2.44376	1	0.414418	70.0728
GOTERM_BP_FAT	GO:0042327~positive regulation of phosphorylation	6	0.894188	0.0683112	OSM, NOD2, LYN, HCLS1, FAM129A, FGF2	499	60	13588	2.72305	1	0.422998	71.2771
GOTERM_BP_FAT	GO:0032270~positive regulation of cellular protein metabolic process	8	1.19225	0.0742579	OSM, NOD2, TNF, LYN, HCLS1, FAM129A, FGF2, TGFB1	499	100	13588	2.17844	1	0.447944	74.3434
GOTERM_BP_FAT	GO:0010562~positive regulation of phosphorus metabolic process	6	0.894188	0.0763795	OSM, NOD2, LYN, HCLS1, FAM129A, FGF2	499	62	13588	2.63521	1	0.454549	75.3605
GOTERM_BP_FAT	GO:0045937~positive regulation of phosphate metabolic process	6	0.894188	0.0763795	OSM, NOD2, LYN, HCLS1, FAM129A, FGF2	499	62	13588	2.63521	1	0.454549	75.3605
GOTERM_BP_FAT	GO:0051247~positive regulation of protein metabolic process	8	1.19225	0.105377	OSM, NOD2, TNF, LYN, HCLS1, FAM129A, FGF2, TGFB1	499	109	13588	1.99857	1	0.54981	85.9595
GOTERM_BP_FAT	GO:0050731~positive regulation of peptidyl-tyrosine phosphorylation	4	0.596125	0.135593	OSM, NOD2, LYN, HCLS1	499	35	13588	3.11205	1	0.633529	92.3386
GOTERM_BP_FAT	GO:0010564~regulation of cell cycle process	3	0.447094	0.753414	OSM, TNF, TGFB1	499	73	13588	1.11906	1	0.9983	100
Annotation Cluster 28	Enrichment Score: 1.7641172157657807
Category	Term	Count	%	PValue	Genes	List Total	Pop Hits	Pop Total	Fold Enrichment	Bonferroni	Benjamini	FDR
GOTERM_BP_FAT	GO:0006690~icosanoid metabolic process	9	1.34128	2.40764e-05	TNFRSF1A, ALOXE3, PTGS2, NCF1, PTGES, ALOX5AP, ALOX12B, ALOX5, MGST2	499	34	13588	7.20806	0.0581212	0.000586874	0.0424395
GOTERM_BP_FAT	GO:0033559~unsaturated fatty acid metabolic process	9	1.34128	3.76196e-05	TNFRSF1A, ALOXE3, PTGS2, NCF1, PTGES, ALOX5AP, ALOX12B, ALOX5, MGST2	499	36	13588	6.80762	0.0893181	0.000865937	0.0663048
GOTERM_BP_FAT	GO:0006691~leukotriene metabolic process	6	0.894188	0.000491765	ALOXE3, NCF1, ALOX5AP, ALOX12B, ALOX5, MGST2	499	19	13588	8.59909	0.705749	0.00834391	0.863474
GOTERM_BP_FAT	GO:0043449~cellular alkene metabolic process	6	0.894188	0.000809953	ALOXE3, NCF1, ALOX5AP, ALOX12B, ALOX5, MGST2	499	21	13588	7.78013	0.866702	0.012594	1.41842
GOTERM_BP_FAT	GO:0046456~icosanoid biosynthetic process	5	0.745156	0.0160217	ALOXE3, PTGS2, ALOX5AP, ALOX12B, ALOX5	499	27	13588	5.04268	1	0.144696	24.7805
GOTERM_BP_FAT	GO:0006636~unsaturated fatty acid biosynthetic process	5	0.745156	0.0181642	ALOXE3, PTGS2, ALOX5AP, ALOX12B, ALOX5	499	28	13588	4.86258	1	0.1586	27.6164
GOTERM_BP_FAT	GO:0019370~leukotriene biosynthetic process	4	0.596125	0.0226884	ALOXE3, ALOX5AP, ALOX12B, ALOX5	499	17	13588	6.40717	1	0.187427	33.2768
GOTERM_BP_FAT	GO:0043450~alkene biosynthetic process	4	0.596125	0.0226884	ALOXE3, ALOX5AP, ALOX12B, ALOX5	499	17	13588	6.40717	1	0.187427	33.2768
GOTERM_BP_FAT	GO:0006631~fatty acid metabolic process	12	1.78838	0.0761003	TNFRSF1A, ALOXE3, PTGS2, NCF1, PTGES, CH25H, STAT5A, ALOX5AP, ALOX12B, FABP4, ALOX5, MGST2	499	184	13588	1.7759	1	0.454304	75.2289
GOTERM_BP_FAT	GO:0006692~prostanoid metabolic process	3	0.447094	0.0912354	TNFRSF1A, PTGS2, PTGES	499	14	13588	5.8351	1	0.506396	81.4871
GOTERM_BP_FAT	GO:0006693~prostaglandin metabolic process	3	0.447094	0.0912354	TNFRSF1A, PTGS2, PTGES	499	14	13588	5.8351	1	0.506396	81.4871
GOTERM_BP_FAT	GO:0046394~carboxylic acid biosynthetic process	9	1.34128	0.146532	CTH, ALOXE3, PTGS2, CH25H, ALOX5AP, ALOX12B, ALOX5, CBS, PRODH	499	141	13588	1.73811	1	0.65727	93.8795
GOTERM_BP_FAT	GO:0016053~organic acid biosynthetic process	9	1.34128	0.146532	CTH, ALOXE3, PTGS2, CH25H, ALOX5AP, ALOX12B, ALOX5, CBS, PRODH	499	141	13588	1.73811	1	0.65727	93.8795
GOTERM_BP_FAT	GO:0006633~fatty acid biosynthetic process	6	0.894188	0.175712	ALOXE3, PTGS2, CH25H, ALOX5AP, ALOX12B, ALOX5	499	81	13588	2.01707	1	0.715793	96.6855
GOTERM_BP_FAT	GO:0008652~cellular amino acid biosynthetic process	3	0.447094	0.483112	CTH, CBS, PRODH	499	44	13588	1.85662	1	0.96703	99.9991
GOTERM_BP_FAT	GO:0008610~lipid biosynthetic process	7	1.04322	0.952663	APOA1, ALOXE3, PTGS2, CH25H, ALOX5AP, ALOX12B, ALOX5	499	285	13588	0.668818	1	0.999997	100
Annotation Cluster 29	Enrichment Score: 1.7398484754812074
Category	Term	Count	%	PValue	Genes	List Total	Pop Hits	Pop Total	Fold Enrichment	Bonferroni	Benjamini	FDR
GOTERM_BP_FAT	GO:0051101~regulation of DNA binding	10	1.49031	0.00147603	MDFI, IRAK3, NOD2, TNF, MYD88, TLR2, NFKBIA, ITGB2, NLRP3, TGFB1	499	74	13588	3.67979	0.974615	0.0204266	2.57062
GOTERM_BP_FAT	GO:0051098~regulation of binding	11	1.63934	0.00165127	MDFI, IRAK3, NOD2, TNF, MYD88, TLR2, NFKBIA, ITGB2, NLRP3, MYC, TGFB1	499	90	13588	3.32817	0.983594	0.0225752	2.87165
GOTERM_BP_FAT	GO:0051100~negative regulation of binding	5	0.745156	0.0229614	MDFI, NOD2, NFKBIA, NLRP3, MYC	499	30	13588	4.53841	1	0.188247	33.6046
GOTERM_BP_FAT	GO:0032088~negative regulation of NF-kappaB transcription factor activity	3	0.447094	0.0496421	NOD2, NFKBIA, NLRP3	499	10	13588	8.16914	1	0.342495	59.249
GOTERM_BP_FAT	GO:0043392~negative regulation of DNA binding	4	0.596125	0.0681959	MDFI, NOD2, NFKBIA, NLRP3	499	26	13588	4.1893	1	0.423436	71.2144
GOTERM_BP_FAT	GO:0043433~negative regulation of transcription factor activity	3	0.447094	0.192039	NOD2, NFKBIA, NLRP3	499	22	13588	3.71324	1	0.744191	97.6706
Annotation Cluster 30	Enrichment Score: 1.7259811944659247
Category	Term	Count	%	PValue	Genes	List Total	Pop Hits	Pop Total	Fold Enrichment	Bonferroni	Benjamini	FDR
GOTERM_BP_FAT	GO:0050708~regulation of protein secretion	7	1.04322	0.000659313	NOD2, TNF, LRRC32, PYCARD, CD40, NLRP3, SRGN	499	30	13588	6.35377	0.806069	0.0108038	1.15606
GOTERM_BP_FAT	GO:0051046~regulation of secretion	14	2.08644	0.000666438	B4GALT1, ADORA3, TNF, LRRC32, CD40, NLRP3, ADA, OSM, INHBB, NOD2, PYCARD, IL1B, FCER1G, SRGN	499	125	13588	3.04981	0.809477	0.0108485	1.16848
GOTERM_BP_FAT	GO:0051051~negative regulation of transport	10	1.49031	0.00121236	OSM, INHBB, TNF, LRRC32, IL1B, NOS3, NLRP3, ADA, TGFB1, SRGN	499	72	13588	3.78201	0.951051	0.0173876	2.11605
GOTERM_BP_FAT	GO:0050707~regulation of cytokine secretion	5	0.745156	0.00176277	NOD2, LRRC32, PYCARD, NLRP3, SRGN	499	15	13588	9.07682	0.987573	0.023821	3.06273
GOTERM_BP_FAT	GO:0060341~regulation of cellular localization	15	2.23547	0.00240525	B4GALT1, TNF, ADORA3, LRRC32, CD40, NLRP3, TGFB1, OSM, INHBB, NOD2, PYCARD, FCER1G, IL1B, SRGN, LCP1	499	161	13588	2.537	0.997494	0.0310297	4.15683
GOTERM_BP_FAT	GO:0051223~regulation of protein transport	9	1.34128	0.00247791	NOD2, TNF, LRRC32, PYCARD, CD40, NLRP3, LCP1, TGFB1, SRGN	499	65	13588	3.77037	0.997909	0.0316256	4.27983
GOTERM_BP_FAT	GO:0070201~regulation of establishment of protein localization	9	1.34128	0.00431678	NOD2, TNF, LRRC32, PYCARD, CD40, NLRP3, LCP1, TGFB1, SRGN	499	71	13588	3.45175	0.999979	0.0485903	7.34359
GOTERM_BP_FAT	GO:0032880~regulation of protein localization	10	1.49031	0.00564275	SGK1, NOD2, TNF, LRRC32, PYCARD, CD40, NLRP3, LCP1, TGFB1, SRGN	499	90	13588	3.02561	0.999999	0.0608941	9.49514
GOTERM_BP_FAT	GO:0032731~positive regulation of interleukin-1 beta production	3	0.447094	0.0249089	NOD2, PYCARD, NLRP3	499	7	13588	11.6702	1	0.199451	35.8997
GOTERM_BP_FAT	GO:0032732~positive regulation of interleukin-1 production	3	0.447094	0.0249089	NOD2, PYCARD, NLRP3	499	7	13588	11.6702	1	0.199451	35.8997
GOTERM_BP_FAT	GO:0050704~regulation of interleukin-1 secretion	3	0.447094	0.0249089	NOD2, PYCARD, NLRP3	499	7	13588	11.6702	1	0.199451	35.8997
GOTERM_BP_FAT	GO:0050706~regulation of interleukin-1 beta secretion	3	0.447094	0.0249089	NOD2, PYCARD, NLRP3	499	7	13588	11.6702	1	0.199451	35.8997
GOTERM_BP_FAT	GO:0050716~positive regulation of interleukin-1 secretion	3	0.447094	0.0249089	NOD2, PYCARD, NLRP3	499	7	13588	11.6702	1	0.199451	35.8997
GOTERM_BP_FAT	GO:0050718~positive regulation of interleukin-1 beta secretion	3	0.447094	0.0249089	NOD2, PYCARD, NLRP3	499	7	13588	11.6702	1	0.199451	35.8997
GOTERM_BP_FAT	GO:0051047~positive regulation of secretion	6	0.894188	0.0440168	INHBB, NOD2, ADORA3, PYCARD, FCER1G, NLRP3	499	53	13588	3.08269	1	0.314045	54.7804
GOTERM_BP_FAT	GO:0050715~positive regulation of cytokine secretion	3	0.447094	0.0496421	NOD2, PYCARD, NLRP3	499	10	13588	8.16914	1	0.342495	59.249
GOTERM_BP_FAT	GO:0032651~regulation of interleukin-1 beta production	3	0.447094	0.0800836	NOD2, PYCARD, NLRP3	499	13	13588	6.28395	1	0.469985	77.0458
GOTERM_BP_FAT	GO:0032652~regulation of interleukin-1 production	3	0.447094	0.0912354	NOD2, PYCARD, NLRP3	499	14	13588	5.8351	1	0.506396	81.4871
GOTERM_BP_FAT	GO:0050714~positive regulation of protein secretion	3	0.447094	0.127026	NOD2, PYCARD, NLRP3	499	17	13588	4.80538	1	0.611855	90.8836
GOTERM_BP_FAT	GO:0051222~positive regulation of protein transport	4	0.596125	0.144136	NOD2, TNF, PYCARD, NLRP3	499	36	13588	3.02561	1	0.653721	93.5693
GOTERM_BP_FAT	GO:0051224~negative regulation of protein transport	3	0.447094	0.152409	LRRC32, NLRP3, SRGN	499	19	13588	4.29955	1	0.670925	94.5815
GOTERM_BP_FAT	GO:0033157~regulation of intracellular protein transport	3	0.447094	0.301461	NLRP3, LCP1, TGFB1	499	30	13588	2.72305	1	0.875048	99.8209
GOTERM_BP_FAT	GO:0032386~regulation of intracellular transport	3	0.447094	0.458825	NLRP3, LCP1, TGFB1	499	42	13588	1.94503	1	0.96011	99.998
Annotation Cluster 31	Enrichment Score: 1.5732825554654717
Category	Term	Count	%	PValue	Genes	List Total	Pop Hits	Pop Total	Fold Enrichment	Bonferroni	Benjamini	FDR
GOTERM_BP_FAT	GO:0045637~regulation of myeloid cell differentiation	9	1.34128	0.000488775	ZFP36, TNF, IKZF1, ETS1, CSF1, STAT5A, NFKBIA, FAS, RUNX1	499	51	13588	4.80538	0.703551	0.00840807	0.858245
GOTERM_BP_FAT	GO:0002763~positive regulation of myeloid leukocyte differentiation	4	0.596125	0.0106351	IKZF1, CSF1, STAT5A, RUNX1	499	13	13588	8.3786	1	0.102853	17.1805
GOTERM_BP_FAT	GO:0045639~positive regulation of myeloid cell differentiation	5	0.745156	0.0122308	IKZF1, ETS1, CSF1, STAT5A, RUNX1	499	25	13588	5.44609	1	0.11566	19.5042
GOTERM_BP_FAT	GO:0002761~regulation of myeloid leukocyte differentiation	5	0.745156	0.0204764	TNF, IKZF1, CSF1, STAT5A, RUNX1	499	29	13588	4.69491	1	0.172929	30.5635
GOTERM_BP_FAT	GO:0040018~positive regulation of multicellular organism growth	4	0.596125	0.0747177	IKZF1, AGT, CSF1, STAT5A	499	27	13588	4.03414	1	0.449036	74.5671
GOTERM_BP_FAT	GO:0040014~regulation of multicellular organism growth	5	0.745156	0.295425	IKZF1, AGT, CSF1, STAT5A, STAT3	499	75	13588	1.81536	1	0.871144	99.7916
GOTERM_BP_FAT	GO:0045927~positive regulation of growth	4	0.596125	0.337748	IKZF1, AGT, CSF1, STAT5A	499	56	13588	1.94503	1	0.903672	99.9301
Annotation Cluster 32	Enrichment Score: 1.5247455269579782
Category	Term	Count	%	PValue	Genes	List Total	Pop Hits	Pop Total	Fold Enrichment	Bonferroni	Benjamini	FDR
GOTERM_BP_FAT	GO:0044236~multicellular organismal metabolic process	5	0.745156	0.0140453	MMP9, TIPARP, MMP8, MMP19, MMP3	499	26	13588	5.23663	1	0.13029	22.0717
GOTERM_BP_FAT	GO:0030574~collagen catabolic process	4	0.596125	0.0226884	MMP9, MMP8, MMP19, MMP3	499	17	13588	6.40717	1	0.187427	33.2768
GOTERM_BP_FAT	GO:0044243~multicellular organismal catabolic process	4	0.596125	0.0265018	MMP9, MMP8, MMP19, MMP3	499	18	13588	6.05121	1	0.209593	37.7209
GOTERM_BP_FAT	GO:0032963~collagen metabolic process	4	0.596125	0.0503057	MMP9, MMP8, MMP19, MMP3	499	23	13588	4.73573	1	0.343528	59.7478
GOTERM_BP_FAT	GO:0044259~multicellular organismal macromolecule metabolic process	4	0.596125	0.0559817	MMP9, MMP8, MMP19, MMP3	499	24	13588	4.53841	1	0.371032	63.7849
Annotation Cluster 33	Enrichment Score: 1.5149550818378956
Category	Term	Count	%	PValue	Genes	List Total	Pop Hits	Pop Total	Fold Enrichment	Bonferroni	Benjamini	FDR
GOTERM_BP_FAT	GO:0050871~positive regulation of B cell activation	9	1.34128	4.64744e-05	CD38, PTPRC, CDKN1A, STAT5A, IL2RG, CD40, PNP, ADA, TGFB1	499	37	13588	6.62363	0.109155	0.00105985	0.0819054
GOTERM_BP_FAT	GO:0002700~regulation of production of molecular mediator of immune response	6	0.894188	0.00432379	PTPRC, NOD2, TNF, FCER1G, CD40, TGFB1	499	30	13588	5.44609	0.999979	0.0484486	7.35509
GOTERM_BP_FAT	GO:0045830~positive regulation of isotype switching	3	0.447094	0.0496421	PTPRC, CD40, TGFB1	499	10	13588	8.16914	1	0.342495	59.249
GOTERM_BP_FAT	GO:0045911~positive regulation of DNA recombination	3	0.447094	0.0592338	PTPRC, CD40, TGFB1	499	11	13588	7.42649	1	0.385363	65.9225
GOTERM_BP_FAT	GO:0002637~regulation of immunoglobulin production	4	0.596125	0.0619478	PTPRC, TNF, CD40, TGFB1	499	25	13588	4.35687	1	0.395468	67.6148
GOTERM_BP_FAT	GO:0051054~positive regulation of DNA metabolic process	4	0.596125	0.0885458	PTPRC, CD40, PNP, TGFB1	499	29	13588	3.75593	1	0.496539	80.497
GOTERM_BP_FAT	GO:0045191~regulation of isotype switching	3	0.447094	0.0912354	PTPRC, CD40, TGFB1	499	14	13588	5.8351	1	0.506396	81.4871
GOTERM_BP_FAT	GO:0000018~regulation of DNA recombination	3	0.447094	0.219134	PTPRC, CD40, TGFB1	499	24	13588	3.40381	1	0.785996	98.7234
GOTERM_BP_FAT	GO:0051052~regulation of DNA metabolic process	4	0.596125	0.357964	PTPRC, CD40, PNP, TGFB1	499	58	13588	1.87796	1	0.916426	99.9595
Annotation Cluster 34	Enrichment Score: 1.4900735311073028
Category	Term	Count	%	PValue	Genes	List Total	Pop Hits	Pop Total	Fold Enrichment	Bonferroni	Benjamini	FDR
GOTERM_BP_FAT	GO:0042060~wound healing	12	1.78838	0.00267684	B4GALT1, VWF, SLC11A1, PLEK, PROCR, FGA, CD44, F13A1, SERPING1, PROS1, TGFB1, PLAUR	499	112	13588	2.91755	0.998727	0.0339504	4.61583
GOTERM_BP_FAT	GO:0007596~blood coagulation	7	1.04322	0.042885	VWF, PLEK, PROCR, FGA, F13A1, SERPING1, PROS1	499	70	13588	2.72305	1	0.308073	53.8272
GOTERM_BP_FAT	GO:0050817~coagulation	7	1.04322	0.042885	VWF, PLEK, PROCR, FGA, F13A1, SERPING1, PROS1	499	70	13588	2.72305	1	0.308073	53.8272
GOTERM_BP_FAT	GO:0050878~regulation of body fluid levels	8	1.19225	0.0446633	VWF, PLEK, PROCR, FGA, F13A1, CLCNKA, SERPING1, PROS1	499	89	13588	2.44768	1	0.317043	55.3165
GOTERM_BP_FAT	GO:0007599~hemostasis	7	1.04322	0.045459	VWF, PLEK, PROCR, FGA, F13A1, SERPING1, PROS1	499	71	13588	2.68469	1	0.319147	55.9682
GOTERM_BP_FAT	GO:0030168~platelet activation	3	0.447094	0.114751	VWF, PLEK, FGA	499	16	13588	5.10571	1	0.578366	88.339
Annotation Cluster 35	Enrichment Score: 1.2951689576620364
Category	Term	Count	%	PValue	Genes	List Total	Pop Hits	Pop Total	Fold Enrichment	Bonferroni	Benjamini	FDR
GOTERM_BP_FAT	GO:0051048~negative regulation of secretion	6	0.894188	0.00268068	OSM, INHBB, LRRC32, IL1B, ADA, SRGN	499	27	13588	6.05121	0.998739	0.0336555	4.62231
GOTERM_BP_FAT	GO:0046888~negative regulation of hormone secretion	3	0.447094	0.127026	OSM, INHBB, IL1B	499	17	13588	4.80538	1	0.611855	90.8836
GOTERM_BP_FAT	GO:0046883~regulation of hormone secretion	3	0.447094	0.382258	OSM, INHBB, IL1B	499	36	13588	2.26921	1	0.929786	99.9795
Annotation Cluster 36	Enrichment Score: 1.112051733473669
Category	Term	Count	%	PValue	Genes	List Total	Pop Hits	Pop Total	Fold Enrichment	Bonferroni	Benjamini	FDR
GOTERM_BP_FAT	GO:0009991~response to extracellular stimulus	11	1.63934	0.0244029	SOAT2, ITGA6, NUAK2, GSDMD, MGP, CP, CLIC1, RUNX1, FOSL1, ANGPTL4, CBS	499	133	13588	2.25214	1	0.196403	35.3107
GOTERM_BP_FAT	GO:0031667~response to nutrient levels	8	1.19225	0.129472	SOAT2, NUAK2, MGP, CP, CLIC1, RUNX1, ANGPTL4, CBS	499	115	13588	1.89429	1	0.617316	91.3237
GOTERM_BP_FAT	GO:0007584~response to nutrient	6	0.894188	0.145958	SOAT2, MGP, CP, CLIC1, RUNX1, CBS	499	76	13588	2.14977	1	0.657709	93.8064
Annotation Cluster 37	Enrichment Score: 1.1120054283915897
Category	Term	Count	%	PValue	Genes	List Total	Pop Hits	Pop Total	Fold Enrichment	Bonferroni	Benjamini	FDR
GOTERM_BP_FAT	GO:0006468~protein amino acid phosphorylation	35	5.2161	0.0193388	FGR, NUAK2, STAT5A, TRIB3, FES, TGFB1, TRIB1, IRAK3, MAP3K6, IL12RB1, MAP3K8, MLKL, FGF2, TES, PIK3CG, MDFI, PTPRC, SGK1, ALPK1, LYN, SGK3, HCK, FLT4, PDK4, PIM1, EPHA2, OSM, IKBKE, PLCE1, RIPK1, GADD45G, RIPK3, JAK3, EIF2AK2, IGFBP3	499	640	13588	1.48917	1	0.165747	29.1279
GOTERM_BP_FAT	GO:0016310~phosphorylation	36	5.36513	0.0516693	FGR, NUAK2, STAT5A, HK2, TRIB3, FES, TGFB1, TRIB1, IRAK3, MAP3K6, IL12RB1, MAP3K8, MLKL, FGF2, TES, PIK3CG, MDFI, PTPRC, SGK1, ALPK1, LYN, SGK3, HCK, FLT4, PDK4, PIM1, EPHA2, OSM, IKBKE, PLCE1, RIPK1, GADD45G, RIPK3, JAK3, EIF2AK2, IGFBP3	499	718	13588	1.36532	1	0.350256	60.7546
GOTERM_BP_FAT	GO:0006796~phosphate metabolic process	38	5.66319	0.188868	FGR, NUAK2, STAT5A, HK2, TRIB3, FES, TGFB1, TRIB1, IRAK3, MAP3K6, IL12RB1, MAP3K8, MLKL, FGF2, TES, PIK3CG, MDFI, PTPRC, PTPN6, SGK1, ALPK1, LYN, SGK3, HCK, FLT4, PDK4, PIM1, EPHA2, OSM, IKBKE, PLCE1, DUSP2, RIPK1, GADD45G, RIPK3, JAK3, EIF2AK2, IGFBP3	499	866	13588	1.19487	1	0.739511	97.5041
GOTERM_BP_FAT	GO:0006793~phosphorus metabolic process	38	5.66319	0.188868	FGR, NUAK2, STAT5A, HK2, TRIB3, FES, TGFB1, TRIB1, IRAK3, MAP3K6, IL12RB1, MAP3K8, MLKL, FGF2, TES, PIK3CG, MDFI, PTPRC, PTPN6, SGK1, ALPK1, LYN, SGK3, HCK, FLT4, PDK4, PIM1, EPHA2, OSM, IKBKE, PLCE1, DUSP2, RIPK1, GADD45G, RIPK3, JAK3, EIF2AK2, IGFBP3	499	866	13588	1.19487	1	0.739511	97.5041
Annotation Cluster 38	Enrichment Score: 1.0970385142434855
Category	Term	Count	%	PValue	Genes	List Total	Pop Hits	Pop Total	Fold Enrichment	Bonferroni	Benjamini	FDR
GOTERM_BP_FAT	GO:0045785~positive regulation of cell adhesion	7	1.04322	0.00452995	ITGAL, ITGA6, CSF1, TGM2, VAV1, CYR61, EMILIN1	499	43	13588	4.43287	0.999988	0.0498099	7.69272
GOTERM_BP_FAT	GO:0010811~positive regulation of cell-substrate adhesion	3	0.447094	0.260263	CSF1, CYR61, EMILIN1	499	27	13588	3.02561	1	0.837217	99.5082
GOTERM_BP_FAT	GO:0010810~regulation of cell-substrate adhesion	3	0.447094	0.433888	CSF1, CYR61, EMILIN1	499	40	13588	2.04228	1	0.951371	99.9956
Annotation Cluster 39	Enrichment Score: 1.0775888495547594
Category	Term	Count	%	PValue	Genes	List Total	Pop Hits	Pop Total	Fold Enrichment	Bonferroni	Benjamini	FDR
GOTERM_BP_FAT	GO:0048570~notochord morphogenesis	3	0.447094	0.0182303	GLI2, EPHA2, GLI1	499	6	13588	13.6152	1	0.158583	27.7022
GOTERM_BP_FAT	GO:0030903~notochord development	3	0.447094	0.0592338	GLI2, EPHA2, GLI1	499	11	13588	7.42649	1	0.385363	65.9225
GOTERM_BP_FAT	GO:0048562~embryonic organ morphogenesis	7	1.04322	0.541839	MDFI, GJB6, GLI2, MYC, CHRNA10, EPHA2, GLI1	499	161	13588	1.18393	1	0.978916	99.9999
Annotation Cluster 40	Enrichment Score: 1.0769914164569443
Category	Term	Count	%	PValue	Genes	List Total	Pop Hits	Pop Total	Fold Enrichment	Bonferroni	Benjamini	FDR
GOTERM_BP_FAT	GO:0045060~negative thymic T cell selection	3	0.447094	0.0406823	PTPRC, FAS, SPN	499	9	13588	9.07682	1	0.296252	51.9174
GOTERM_BP_FAT	GO:0043383~negative T cell selection	3	0.447094	0.0496421	PTPRC, FAS, SPN	499	10	13588	8.16914	1	0.342495	59.249
GOTERM_BP_FAT	GO:0045061~thymic T cell selection	3	0.447094	0.102806	PTPRC, FAS, SPN	499	15	13588	5.44609	1	0.544602	85.2308
GOTERM_BP_FAT	GO:0033077~T cell differentiation in the thymus	4	0.596125	0.111103	PTPRC, STAT5A, FAS, SPN	499	32	13588	3.40381	1	0.567974	87.4623
GOTERM_BP_FAT	GO:0045058~T cell selection	3	0.447094	0.178665	PTPRC, FAS, SPN	499	21	13588	3.89007	1	0.721427	96.8887
Annotation Cluster 41	Enrichment Score: 1.0701143548612428
Category	Term	Count	%	PValue	Genes	List Total	Pop Hits	Pop Total	Fold Enrichment	Bonferroni	Benjamini	FDR
GOTERM_BP_FAT	GO:0048872~homeostasis of number of cells	10	1.49031	0.0229507	LYN, IL20RB, BCL2A1A, HCLS1, CSF1, STAT5A, FAS, TGFB1, TIMP1, CD7	499	113	13588	2.40978	1	0.18878	33.5918
GOTERM_BP_FAT	GO:0002260~lymphocyte homeostasis	4	0.596125	0.095833	BCL2A1A, STAT5A, FAS, TGFB1	499	30	13588	3.63073	1	0.521401	83.0707
GOTERM_BP_FAT	GO:0043029~T cell homeostasis	3	0.447094	0.139591	STAT5A, FAS, TGFB1	499	18	13588	4.53841	1	0.643017	92.9399
GOTERM_BP_FAT	GO:0001776~leukocyte homeostasis	4	0.596125	0.170755	BCL2A1A, STAT5A, FAS, TGFB1	499	39	13588	2.79287	1	0.705425	96.3159
Annotation Cluster 42	Enrichment Score: 1.067618049554297
Category	Term	Count	%	PValue	Genes	List Total	Pop Hits	Pop Total	Fold Enrichment	Bonferroni	Benjamini	FDR
GOTERM_BP_FAT	GO:0010553~negative regulation of specific transcription from RNA polymerase II promoter	4	0.596125	0.0398521	IKZF1, TIMELESS, MYC, ZBTB42	499	21	13588	5.18675	1	0.291915	51.1785
GOTERM_BP_FAT	GO:0032582~negative regulation of gene-specific transcription	4	0.596125	0.0503057	IKZF1, TIMELESS, MYC, ZBTB42	499	23	13588	4.73573	1	0.343528	59.7478
GOTERM_BP_FAT	GO:0010551~regulation of specific transcription from RNA polymerase II promoter	5	0.745156	0.116111	CEBPA, IKZF1, TIMELESS, MYC, ZBTB42	499	51	13588	2.66965	1	0.581898	88.6509
GOTERM_BP_FAT	GO:0032583~regulation of gene-specific transcription	5	0.745156	0.230455	CEBPA, IKZF1, TIMELESS, MYC, ZBTB42	499	67	13588	2.03212	1	0.803817	99.0132
Annotation Cluster 43	Enrichment Score: 1.0583422984213096
Category	Term	Count	%	PValue	Genes	List Total	Pop Hits	Pop Total	Fold Enrichment	Bonferroni	Benjamini	FDR
GOTERM_BP_FAT	GO:0001933~negative regulation of protein amino acid phosphorylation	4	0.596125	0.0503057	PTPN6, PTPRC, FAM129A, IGFBP3	499	23	13588	4.73573	1	0.343528	59.7478
GOTERM_BP_FAT	GO:0051248~negative regulation of protein metabolic process	7	1.04322	0.0661381	PTPN6, PTPRC, IRAK3, EIF4EBP1, SERPING1, FAM129A, IGFBP3	499	78	13588	2.44376	1	0.414418	70.0728
GOTERM_BP_FAT	GO:0042326~negative regulation of phosphorylation	4	0.596125	0.0747177	PTPN6, PTPRC, FAM129A, IGFBP3	499	27	13588	4.03414	1	0.449036	74.5671
GOTERM_BP_FAT	GO:0045936~negative regulation of phosphate metabolic process	4	0.596125	0.0885458	PTPN6, PTPRC, FAM129A, IGFBP3	499	29	13588	3.75593	1	0.496539	80.497
GOTERM_BP_FAT	GO:0010563~negative regulation of phosphorus metabolic process	4	0.596125	0.0885458	PTPN6, PTPRC, FAM129A, IGFBP3	499	29	13588	3.75593	1	0.496539	80.497
GOTERM_BP_FAT	GO:0032269~negative regulation of cellular protein metabolic process	6	0.894188	0.123877	PTPN6, PTPRC, EIF4EBP1, SERPING1, FAM129A, IGFBP3	499	72	13588	2.26921	1	0.604057	90.2862
GOTERM_BP_FAT	GO:0031400~negative regulation of protein modification process	4	0.596125	0.161728	PTPN6, PTPRC, FAM129A, IGFBP3	499	38	13588	2.86636	1	0.691564	95.541
Annotation Cluster 44	Enrichment Score: 0.9925742856279077
Category	Term	Count	%	PValue	Genes	List Total	Pop Hits	Pop Total	Fold Enrichment	Bonferroni	Benjamini	FDR
GOTERM_BP_FAT	GO:0021940~positive regulation of granule cell precursor proliferation	3	0.447094	0.0406823	GLI2, FGF2, GLI1	499	9	13588	9.07682	1	0.296252	51.9174
GOTERM_BP_FAT	GO:0021936~regulation of granule cell precursor proliferation	3	0.447094	0.0406823	GLI2, FGF2, GLI1	499	9	13588	9.07682	1	0.296252	51.9174
GOTERM_BP_FAT	GO:0051960~regulation of nervous system development	6	0.894188	0.636014	TGIF1, RHOC, GLI2, FGF2, TGFB1, GLI1	499	148	13588	1.10394	1	0.991818	100
Annotation Cluster 45	Enrichment Score: 0.9552816325191378
Category	Term	Count	%	PValue	Genes	List Total	Pop Hits	Pop Total	Fold Enrichment	Bonferroni	Benjamini	FDR
GOTERM_BP_FAT	GO:0001890~placenta development	9	1.34128	0.0143072	CEBPA, MDFI, VCAM1, VWF, CEBPB, ADM, SOCS3, ADA, CYR61	499	87	13588	2.81694	1	0.131597	22.436
GOTERM_BP_FAT	GO:0060713~labyrinthine layer morphogenesis	4	0.596125	0.0226884	VCAM1, ADM, SOCS3, CYR61	499	17	13588	6.40717	1	0.187427	33.2768
GOTERM_BP_FAT	GO:0001892~embryonic placenta development	7	1.04322	0.0238219	CEBPA, MDFI, VCAM1, CEBPB, ADM, SOCS3, CYR61	499	61	13588	3.12481	1	0.192773	34.628
GOTERM_BP_FAT	GO:0060669~embryonic placenta morphogenesis	3	0.447094	0.0496421	VCAM1, ADM, SOCS3	499	10	13588	8.16914	1	0.342495	59.249
GOTERM_BP_FAT	GO:0048568~embryonic organ development	15	2.23547	0.0603355	CEBPA, MDFI, CEBPB, SOCS3, GJB6, GLI2, ADA, EPHA2, GLI1, VCAM1, ADM, RUNX1, MYC, CHRNA10, CYR61	499	241	13588	1.69484	1	0.388194	66.6193
GOTERM_BP_FAT	GO:0060711~labyrinthine layer development	4	0.596125	0.135593	VCAM1, ADM, SOCS3, CYR61	499	35	13588	3.11205	1	0.633529	92.3386
GOTERM_BP_FAT	GO:0021915~neural tube development	6	0.894188	0.188215	ADM, CASP8, TGIF1, GLI2, EPHA2, VASP	499	83	13588	1.96847	1	0.739067	97.4684
GOTERM_BP_FAT	GO:0001701~in utero embryonic development	12	1.78838	0.383341	CEBPA, MDFI, VCAM1, MAFF, CEBPB, ADM, SOCS3, TEAD4, RUNX1, GLI2, ADA, CYR61	499	267	13588	1.22384	1	0.930051	99.9801
GOTERM_BP_FAT	GO:0043009~chordate embryonic development	17	2.53353	0.486834	CEBPA, MDFI, MAFF, CEBPB, IFITM1, SOCS3, GLI2, ADA, VASP, EPHA2, VCAM1, ADM, CASP8, TEAD4, TGIF1, RUNX1, CYR61	499	421	13588	1.09957	1	0.967552	99.9992
GOTERM_BP_FAT	GO:0009792~embryonic development ending in birth or egg hatching	17	2.53353	0.504168	CEBPA, MDFI, MAFF, CEBPB, IFITM1, SOCS3, GLI2, ADA, VASP, EPHA2, VCAM1, ADM, CASP8, TEAD4, TGIF1, RUNX1, CYR61	499	425	13588	1.08922	1	0.971163	99.9996
GOTERM_BP_FAT	GO:0048598~embryonic morphogenesis	14	2.08644	0.558099	MDFI, SOCS3, GJB6, GLI2, VASP, EPHA2, GLI1, VCAM1, ADM, CASP8, TGIF1, MYC, CHRNA10, CYR61	499	359	13588	1.06191	1	0.981795	99.9999
Annotation Cluster 46	Enrichment Score: 0.9210887528334394
Category	Term	Count	%	PValue	Genes	List Total	Pop Hits	Pop Total	Fold Enrichment	Bonferroni	Benjamini	FDR
GOTERM_BP_FAT	GO:0030003~cellular cation homeostasis	13	1.93741	0.0101182	PTPRC, SGK1, TGFB1, SLC11A1, HAMP, MT2, TGM2, MT1, LTF, TRPV4, IL1B, STC1, SCARA5	499	152	13588	2.32892	1	0.0988497	16.4144
GOTERM_BP_FAT	GO:0030005~cellular di-, tri-valent inorganic cation homeostasis	12	1.78838	0.0102583	PTPRC, SLC11A1, HAMP, MT2, TGM2, MT1, IL1B, LTF, TRPV4, STC1, SCARA5, TGFB1	499	134	13588	2.43855	1	0.0997646	16.6227
GOTERM_BP_FAT	GO:0055066~di-, tri-valent inorganic cation homeostasis	12	1.78838	0.0185341	PTPRC, SLC11A1, HAMP, MT2, TGM2, MT1, IL1B, LTF, TRPV4, STC1, SCARA5, TGFB1	499	146	13588	2.23812	1	0.16047	28.0956
GOTERM_BP_FAT	GO:0055080~cation homeostasis	13	1.93741	0.0384832	PTPRC, SGK1, TGFB1, SLC11A1, HAMP, MT2, TGM2, MT1, LTF, TRPV4, IL1B, STC1, SCARA5	499	184	13588	1.92389	1	0.284118	49.9367
GOTERM_BP_FAT	GO:0006875~cellular metal ion homeostasis	8	1.19225	0.0742579	PTPRC, SGK1, TGM2, MT1, IL1B, TRPV4, STC1, TGFB1	499	100	13588	2.17844	1	0.447944	74.3434
GOTERM_BP_FAT	GO:0055065~metal ion homeostasis	8	1.19225	0.0943207	PTPRC, SGK1, TGM2, MT1, IL1B, TRPV4, STC1, TGFB1	499	106	13588	2.05513	1	0.516549	82.5645
GOTERM_BP_FAT	GO:0006873~cellular ion homeostasis	14	2.08644	0.163988	PTPRC, SGK1, TGFB1, SLC11A1, HAMP, MT2, TGM2, MT1, IL1B, LGI4, LTF, TRPV4, STC1, SCARA5	499	261	13588	1.46064	1	0.694167	95.7483
GOTERM_BP_FAT	GO:0055082~cellular chemical homeostasis	14	2.08644	0.185267	PTPRC, SGK1, TGFB1, SLC11A1, HAMP, MT2, TGM2, MT1, IL1B, LGI4, LTF, TRPV4, STC1, SCARA5	499	268	13588	1.42249	1	0.733816	97.3013
GOTERM_BP_FAT	GO:0042592~homeostatic process	26	3.87481	0.231981	XDH, PTPRC, SGK1, LYN, CSF1, STAT5A, HCLS1, STAT3, TGFB1, TIMP1, SLC11A1, IL20RB, HAMP, BCL2A1A, TGM2, MT2, FABP4, MT1, LGI4, LTF, TRPV4, IL1B, STC1, FAS, SCARA5, CD7	499	584	13588	1.21232	1	0.805429	99.0471
GOTERM_BP_FAT	GO:0006874~cellular calcium ion homeostasis	6	0.894188	0.241075	PTPRC, TGM2, IL1B, TRPV4, STC1, TGFB1	499	91	13588	1.79542	1	0.816206	99.2276
GOTERM_BP_FAT	GO:0055074~calcium ion homeostasis	6	0.894188	0.268876	PTPRC, TGM2, IL1B, TRPV4, STC1, TGFB1	499	95	13588	1.71982	1	0.846917	99.6
GOTERM_BP_FAT	GO:0050801~ion homeostasis	14	2.08644	0.277957	PTPRC, SGK1, TGFB1, SLC11A1, HAMP, MT2, TGM2, MT1, IL1B, LGI4, LTF, TRPV4, STC1, SCARA5	499	293	13588	1.30111	1	0.854625	99.6791
GOTERM_BP_FAT	GO:0048878~chemical homeostasis	16	2.3845	0.362359	PTPRC, SGK1, TGFB1, STAT3, SLC11A1, HAMP, MT2, TGM2, MT1, IL1B, LGI4, LTF, FABP4, TRPV4, STC1, SCARA5	499	365	13588	1.19366	1	0.918666	99.9641
GOTERM_BP_FAT	GO:0007204~elevation of cytosolic calcium ion concentration	3	0.447094	0.382258	PTPRC, TGM2, IL1B	499	36	13588	2.26921	1	0.929786	99.9795
GOTERM_BP_FAT	GO:0051480~cytosolic calcium ion homeostasis	3	0.447094	0.408347	PTPRC, TGM2, IL1B	499	38	13588	2.14977	1	0.940706	99.9904
GOTERM_BP_FAT	GO:0019725~cellular homeostasis	14	2.08644	0.491514	PTPRC, SGK1, TGFB1, SLC11A1, HAMP, MT2, TGM2, MT1, IL1B, LGI4, LTF, TRPV4, STC1, SCARA5	499	343	13588	1.11145	1	0.968822	99.9993
Annotation Cluster 47	Enrichment Score: 0.9092278445806997
Category	Term	Count	%	PValue	Genes	List Total	Pop Hits	Pop Total	Fold Enrichment	Bonferroni	Benjamini	FDR
GOTERM_BP_FAT	GO:0035295~tube development	22	3.27869	0.000724323	CEBPA, B4GALT1, CSF1, MGP, GLI2, ADA, VASP, TGFB1, GLI1, ADM, TIMELESS, CD44, CRISPLD2, AGT, NOTCH4, CASP8, TGM2, TGIF1, NOS3, LOX, FGF2, TES	499	264	13588	2.26921	0.835039	0.0114851	1.26936
GOTERM_BP_FAT	GO:0001763~morphogenesis of a branching structure	11	1.63934	0.016562	B4GALT1, TIMELESS, ADM, CD44, SOCS3, AGT, CSF1, NOTCH4, TGM2, GLI2, TGFB1	499	125	13588	2.39628	1	0.147642	25.5053
GOTERM_BP_FAT	GO:0060562~epithelial tube morphogenesis	10	1.49031	0.0206941	TIMELESS, ADM, CD44, AGT, CSF1, CASP8, TGIF1, GLI2, VASP, TGFB1	499	111	13588	2.45319	1	0.174032	30.8351
GOTERM_BP_FAT	GO:0035239~tube morphogenesis	13	1.93741	0.0236128	B4GALT1, CSF1, GLI2, TGFB1, VASP, TIMELESS, CD44, ADM, AGT, CASP8, NOTCH4, TGM2, TGIF1	499	171	13588	2.07015	1	0.191851	34.3808
GOTERM_BP_FAT	GO:0060429~epithelium development	17	2.53353	0.0415581	B4GALT1, F11R, CEBPB, PTGS2, STAT5A, CSF1, GLI2, VASP, TGFB1, ADM, TIMELESS, CD44, AGT, CASP8, TGM1, TGIF1, FGF2	499	271	13588	1.70818	1	0.300818	52.6855
GOTERM_BP_FAT	GO:0048754~branching morphogenesis of a tube	8	1.19225	0.0543549	B4GALT1, TIMELESS, CD44, AGT, CSF1, NOTCH4, GLI2, TGFB1	499	93	13588	2.34241	1	0.363185	62.6686
GOTERM_BP_FAT	GO:0022612~gland morphogenesis	7	1.04322	0.0875908	TNF, CD44, CSF1, STAT5A, TGM2, GLI2, TGFB1	499	84	13588	2.26921	1	0.493648	80.1335
GOTERM_BP_FAT	GO:0002009~morphogenesis of an epithelium	11	1.63934	0.103962	TIMELESS, ADM, CD44, AGT, CSF1, STAT5A, CASP8, TGIF1, GLI2, VASP, TGFB1	499	173	13588	1.73142	1	0.546753	85.5627
GOTERM_BP_FAT	GO:0035148~tube lumen formation	5	0.745156	0.169838	ADM, CASP8, TGM2, TGIF1, VASP	499	59	13588	2.30767	1	0.704238	96.2434
GOTERM_BP_FAT	GO:0021915~neural tube development	6	0.894188	0.188215	ADM, CASP8, TGIF1, GLI2, EPHA2, VASP	499	83	13588	1.96847	1	0.739067	97.4684
GOTERM_BP_FAT	GO:0048729~tissue morphogenesis	12	1.78838	0.260255	TIMELESS, ADM, CD44, AGT, CSF1, STAT5A, CASP8, TGIF1, GLI2, EPHA2, VASP, TGFB1	499	238	13588	1.37296	1	0.837921	99.5081
GOTERM_BP_FAT	GO:0001841~neural tube formation	4	0.596125	0.287174	ADM, CASP8, TGIF1, VASP	499	51	13588	2.13572	1	0.863987	99.7441
GOTERM_BP_FAT	GO:0001838~embryonic epithelial tube formation	4	0.596125	0.317496	ADM, CASP8, TGIF1, VASP	499	54	13588	2.01707	1	0.88853	99.8811
GOTERM_BP_FAT	GO:0016331~morphogenesis of embryonic epithelium	5	0.745156	0.320408	ADM, CASP8, TGIF1, GLI2, VASP	499	78	13588	1.74554	1	0.890119	99.8897
GOTERM_BP_FAT	GO:0001843~neural tube closure	3	0.447094	0.42119	ADM, TGIF1, VASP	499	39	13588	2.09465	1	0.946303	99.9935
GOTERM_BP_FAT	GO:0060606~tube closure	3	0.447094	0.42119	ADM, TGIF1, VASP	499	39	13588	2.09465	1	0.946303	99.9935
GOTERM_BP_FAT	GO:0001655~urogenital system development	7	1.04322	0.446794	TIMELESS, CD44, AGT, STAT5A, TIPARP, ADAMTS1, GLI2	499	146	13588	1.30557	1	0.955817	99.9971
GOTERM_BP_FAT	GO:0014020~primary neural tube formation	3	0.447094	0.458825	ADM, TGIF1, VASP	499	42	13588	1.94503	1	0.96011	99.998
GOTERM_BP_FAT	GO:0003006~reproductive developmental process	10	1.49031	0.635209	B4GALT1, CD44, AGT, CSF1, STAT5A, NOS3, ADAMTS1, GLI2, FANCA, TGFB1	499	264	13588	1.03146	1	0.991807	100
GOTERM_BP_FAT	GO:0007507~heart development	5	0.745156	0.965779	VCAM1, ADM, CASP8, ADAMTS1, GLI2	499	223	13588	0.610548	1	0.999999	100
Annotation Cluster 48	Enrichment Score: 0.834098671916421
Category	Term	Count	%	PValue	Genes	List Total	Pop Hits	Pop Total	Fold Enrichment	Bonferroni	Benjamini	FDR
GOTERM_BP_FAT	GO:0043487~regulation of RNA stability	4	0.596125	0.0191963	ZFP36, SLC11A1, TNFRSF1B, APOBEC1	499	16	13588	6.80762	1	0.165184	28.9462
GOTERM_BP_FAT	GO:0043488~regulation of mRNA stability	3	0.447094	0.0800836	ZFP36, SLC11A1, APOBEC1	499	13	13588	6.28395	1	0.469985	77.0458
GOTERM_BP_FAT	GO:0010608~posttranscriptional regulation of gene expression	8	1.19225	0.299851	ZFP36, SLC11A1, EIF4EBP1, TNFRSF1B, TNF, APOBEC1, IFI30, FAM129A	499	148	13588	1.47192	1	0.87398	99.8135
GOTERM_BP_FAT	GO:0016071~mRNA metabolic process	3	0.447094	0.999858	ZFP36, SLC11A1, APOBEC1	499	302	13588	0.270501	1	1	100
Annotation Cluster 49	Enrichment Score: 0.8127866184087167
Category	Term	Count	%	PValue	Genes	List Total	Pop Hits	Pop Total	Fold Enrichment	Bonferroni	Benjamini	FDR
GOTERM_BP_FAT	GO:0006820~anion transport	9	1.34128	0.104983	GABRR2, SLC11A1, P2RY6, SLC4A11, SLC25A13, SLCO4A1, CLCNKA, CLIC1, TES	499	130	13588	1.88519	1	0.549423	85.85
GOTERM_BP_FAT	GO:0006821~chloride transport	5	0.745156	0.184445	GABRR2, P2RY6, CLCNKA, CLIC1, TES	499	61	13588	2.232	1	0.732993	97.2529
GOTERM_BP_FAT	GO:0015698~inorganic anion transport	6	0.894188	0.188215	GABRR2, SLC11A1, P2RY6, CLCNKA, CLIC1, TES	499	83	13588	1.96847	1	0.739067	97.4684
Annotation Cluster 50	Enrichment Score: 0.790122399527428
Category	Term	Count	%	PValue	Genes	List Total	Pop Hits	Pop Total	Fold Enrichment	Bonferroni	Benjamini	FDR
GOTERM_BP_FAT	GO:0015833~peptide transport	6	0.894188	0.0280633	TAP2, TAP1, IL1RN, MC4R, TRPV4, SLC15A3	499	47	13588	3.47623	1	0.219268	39.4589
GOTERM_BP_FAT	GO:0046903~secretion	14	2.08644	0.0632929	ADORA3, PLEK, IL1RN, ANXA1, CLCNKA, MYO1F, TIMP4, NLRP3, FCGR3, TRAF3IP2, AGT, MC4R, TRPV4, LCP2	499	221	13588	1.72501	1	0.401285	68.4239
GOTERM_BP_FAT	GO:0010817~regulation of hormone levels	9	1.34128	0.0982273	ADORA3, APOA1, CYP1B1, SLCO4A1, AGT, IL1RN, MC4R, TRPV4, RETSAT	499	128	13588	1.91464	1	0.529552	83.8439
GOTERM_BP_FAT	GO:0032940~secretion by cell	11	1.63934	0.146023	TRAF3IP2, ADORA3, PLEK, IL1RN, MC4R, MYO1F, TRPV4, TIMP4, NLRP3, LCP2, FCGR3	499	186	13588	1.6104	1	0.656885	93.8148
GOTERM_BP_FAT	GO:0046879~hormone secretion	4	0.596125	0.189221	ADORA3, IL1RN, MC4R, TRPV4	499	41	13588	2.65663	1	0.739334	97.5232
GOTERM_BP_FAT	GO:0003001~generation of a signal involved in cell-cell signaling	6	0.894188	0.194583	ADORA3, IL1RN, MC4R, TRPV4, TIMP4, FCGR3	499	84	13588	1.94503	1	0.747516	97.7966
GOTERM_BP_FAT	GO:0009914~hormone transport	4	0.596125	0.198638	ADORA3, IL1RN, MC4R, TRPV4	499	42	13588	2.59338	1	0.753735	97.9842
GOTERM_BP_FAT	GO:0030072~peptide hormone secretion	3	0.447094	0.35569	IL1RN, MC4R, TRPV4	499	34	13588	2.40269	1	0.915227	99.9569
GOTERM_BP_FAT	GO:0002790~peptide secretion	3	0.447094	0.382258	IL1RN, MC4R, TRPV4	499	36	13588	2.26921	1	0.929786	99.9795
GOTERM_BP_FAT	GO:0007267~cell-cell signaling	12	1.78838	0.49552	ADORA3, STAB1, IL1RN, MC4R, TRPV4, TIMP4, GLI2, FGF2, CHRNA10, FCGR3, TES, GLI1	499	290	13588	1.12678	1	0.969627	99.9994
Annotation Cluster 51	Enrichment Score: 0.7321934342394544
Category	Term	Count	%	PValue	Genes	List Total	Pop Hits	Pop Total	Fold Enrichment	Bonferroni	Benjamini	FDR
GOTERM_BP_FAT	GO:0051336~regulation of hydrolase activity	13	1.93741	0.0571785	CFLAR, ASAP3, NLRP3, VAV1, PLCE1, BCL2A1D, APOA1, TGM2, PYCARD, NOS3, ARAP3, MYC, ANGPTL4	499	196	13588	1.8061	1	0.376468	64.5858
GOTERM_BP_FAT	GO:0052548~regulation of endopeptidase activity	5	0.745156	0.110001	CFLAR, BCL2A1D, PYCARD, NLRP3, MYC	499	50	13588	2.72305	1	0.565179	87.1853
GOTERM_BP_FAT	GO:0043281~regulation of caspase activity	5	0.745156	0.110001	CFLAR, BCL2A1D, PYCARD, NLRP3, MYC	499	50	13588	2.72305	1	0.565179	87.1853
GOTERM_BP_FAT	GO:0052547~regulation of peptidase activity	5	0.745156	0.116111	CFLAR, BCL2A1D, PYCARD, NLRP3, MYC	499	51	13588	2.66965	1	0.581898	88.6509
GOTERM_BP_FAT	GO:0006919~activation of caspase activity	3	0.447094	0.342251	PYCARD, NLRP3, MYC	499	33	13588	2.4755	1	0.906325	99.938
GOTERM_BP_FAT	GO:0051345~positive regulation of hydrolase activity	5	0.745156	0.345539	PLCE1, PYCARD, TGM2, NLRP3, MYC	499	81	13588	1.68089	1	0.908444	99.9433
GOTERM_BP_FAT	GO:0043280~positive regulation of caspase activity	3	0.447094	0.382258	PYCARD, NLRP3, MYC	499	36	13588	2.26921	1	0.929786	99.9795
GOTERM_BP_FAT	GO:0010952~positive regulation of peptidase activity	3	0.447094	0.382258	PYCARD, NLRP3, MYC	499	36	13588	2.26921	1	0.929786	99.9795
Annotation Cluster 52	Enrichment Score: 0.718999456769353
Category	Term	Count	%	PValue	Genes	List Total	Pop Hits	Pop Total	Fold Enrichment	Bonferroni	Benjamini	FDR
GOTERM_BP_FAT	GO:0048871~multicellular organismal homeostasis	7	1.04322	0.045459	XDH, SLC11A1, IL20RB, CSF1, IL1B, STAT3, CD7	499	71	13588	2.68469	1	0.319147	55.9682
GOTERM_BP_FAT	GO:0048873~homeostasis of number of cells within a tissue	3	0.447094	0.178665	IL20RB, CSF1, CD7	499	21	13588	3.89007	1	0.721427	96.8887
GOTERM_BP_FAT	GO:0001894~tissue homeostasis	4	0.596125	0.277111	XDH, IL20RB, CSF1, CD7	499	50	13588	2.17844	1	0.854953	99.6724
GOTERM_BP_FAT	GO:0060249~anatomical structure homeostasis	4	0.596125	0.591136	XDH, IL20RB, CSF1, CD7	499	83	13588	1.31231	1	0.986799	100
Annotation Cluster 53	Enrichment Score: 0.6933743076471875
Category	Term	Count	%	PValue	Genes	List Total	Pop Hits	Pop Total	Fold Enrichment	Bonferroni	Benjamini	FDR
GOTERM_BP_FAT	GO:0048754~branching morphogenesis of a tube	8	1.19225	0.0543549	B4GALT1, TIMELESS, CD44, AGT, CSF1, NOTCH4, GLI2, TGFB1	499	93	13588	2.34241	1	0.363185	62.6686
GOTERM_BP_FAT	GO:0022612~gland morphogenesis	7	1.04322	0.0875908	TNF, CD44, CSF1, STAT5A, TGM2, GLI2, TGFB1	499	84	13588	2.26921	1	0.493648	80.1335
GOTERM_BP_FAT	GO:0060603~mammary gland duct morphogenesis	3	0.447094	0.246519	CSF1, GLI2, TGFB1	499	26	13588	3.14198	1	0.822646	99.3197
GOTERM_BP_FAT	GO:0048589~developmental growth	6	0.894188	0.304523	ADM, PTGS2, CSF1, GLI2, TGFB1, PLAUR	499	100	13588	1.63383	1	0.877593	99.8343
GOTERM_BP_FAT	GO:0060443~mammary gland morphogenesis	3	0.447094	0.342251	CSF1, GLI2, TGFB1	499	33	13588	2.4755	1	0.906325	99.938
GOTERM_BP_FAT	GO:0040007~growth	8	1.19225	0.56525	INHBB, ADM, PTGS2, CSF1, GLI2, TGFB1, EMP1, PLAUR	499	193	13588	1.12872	1	0.982786	100
Annotation Cluster 54	Enrichment Score: 0.6719196496495479
Category	Term	Count	%	PValue	Genes	List Total	Pop Hits	Pop Total	Fold Enrichment	Bonferroni	Benjamini	FDR
GOTERM_BP_FAT	GO:0001501~skeletal system development	15	2.23547	0.162293	MDFI, PTGS2, H2-M5, MMP9, TIPARP, MGP, GLI2, EPHA2, TGFB1, CSRNP1, UBD, RUNX1, MYC, IGFBP3, CBS	499	285	13588	1.43318	1	0.691977	95.5938
GOTERM_BP_FAT	GO:0001503~ossification	7	1.04322	0.193258	PTGS2, H2-M5, MGP, UBD, GLI2, IGFBP3, CBS	499	106	13588	1.79824	1	0.745754	97.7318
GOTERM_BP_FAT	GO:0001649~osteoblast differentiation	4	0.596125	0.247173	H2-M5, UBD, GLI2, IGFBP3	499	47	13588	2.31749	1	0.822832	99.33
GOTERM_BP_FAT	GO:0060348~bone development	7	1.04322	0.264779	PTGS2, H2-M5, MGP, UBD, GLI2, IGFBP3, CBS	499	118	13588	1.61537	1	0.842406	99.5586
Annotation Cluster 55	Enrichment Score: 0.6466956367248762
Category	Term	Count	%	PValue	Genes	List Total	Pop Hits	Pop Total	Fold Enrichment	Bonferroni	Benjamini	FDR
GOTERM_BP_FAT	GO:0006357~regulation of transcription from RNA polymerase II promoter	35	5.2161	0.011511	TNF, ELF4, STAT5A, GLI2, TGFB1, GLI1, SAP30, TNFRSF1A, SLC11A1, MYD88, TEAD4, BCL3, RUNX1, FGF2, FOSL1, MYC, CEBPA, TXNIP, ZBTB7B, MDFI, CEBPB, IKZF1, CEBPD, TEAD3, STAT3, ZBTB42, OSM, TIMELESS, ETS1, CSRNP1, IRF1, BCL6B, TGIF1, JAK3, IFI204	499	616	13588	1.54719	1	0.109618	18.4638
GOTERM_BP_FAT	GO:0010605~negative regulation of macromolecule metabolic process	25	3.72578	0.117151	SBNO2, TNF, NOSTRIN, GLI2, TGFB1, SAP30, IRAK3, EIF4EBP1, BCL3, FAM129A, MYC, MDFI, TXNIP, CEBPA, PTPRC, PTPN6, IKZF1, SERPING1, ZBTB42, INHBB, TIMELESS, BCL6B, FABP4, TGIF1, IGFBP3	499	506	13588	1.34538	1	0.584326	88.884
GOTERM_BP_FAT	GO:0000122~negative regulation of transcription from RNA polymerase II promoter	13	1.93741	0.143672	TXNIP, MDFI, CEBPA, TNF, IKZF1, GLI2, TGFB1, ZBTB42, SAP30, TIMELESS, BCL6B, TGIF1, MYC	499	231	13588	1.53245	1	0.653448	93.5076
GOTERM_BP_FAT	GO:0045892~negative regulation of transcription, DNA-dependent	15	2.23547	0.240288	CEBPA, MDFI, TXNIP, SBNO2, TNF, IKZF1, NOSTRIN, GLI2, TGFB1, ZBTB42, SAP30, TIMELESS, BCL6B, TGIF1, MYC	499	308	13588	1.32616	1	0.815803	99.2134
GOTERM_BP_FAT	GO:0051253~negative regulation of RNA metabolic process	15	2.23547	0.241236	CEBPA, MDFI, TXNIP, SBNO2, TNF, IKZF1, NOSTRIN, GLI2, TGFB1, ZBTB42, SAP30, TIMELESS, BCL6B, TGIF1, MYC	499	310	13588	1.3176	1	0.815677	99.2305
GOTERM_BP_FAT	GO:0010558~negative regulation of macromolecule biosynthetic process	19	2.83159	0.275735	CEBPA, TXNIP, MDFI, SBNO2, TNF, IKZF1, NOSTRIN, GLI2, TGFB1, ZBTB42, INHBB, SAP30, EIF4EBP1, TIMELESS, BCL6B, TGIF1, BCL3, FABP4, MYC	499	418	13588	1.23775	1	0.853976	99.6612
GOTERM_BP_FAT	GO:0031327~negative regulation of cellular biosynthetic process	19	2.83159	0.318993	CEBPA, TXNIP, MDFI, SBNO2, TNF, IKZF1, NOSTRIN, GLI2, TGFB1, ZBTB42, INHBB, SAP30, EIF4EBP1, TIMELESS, BCL6B, TGIF1, BCL3, FABP4, MYC	499	430	13588	1.20321	1	0.889366	99.8856
GOTERM_BP_FAT	GO:0009890~negative regulation of biosynthetic process	19	2.83159	0.326836	CEBPA, TXNIP, MDFI, SBNO2, TNF, IKZF1, NOSTRIN, GLI2, TGFB1, ZBTB42, INHBB, SAP30, EIF4EBP1, TIMELESS, BCL6B, TGIF1, BCL3, FABP4, MYC	499	434	13588	1.19212	1	0.895389	99.9067
GOTERM_BP_FAT	GO:0016481~negative regulation of transcription	16	2.3845	0.388039	CEBPA, MDFI, TXNIP, SBNO2, TNF, IKZF1, NOSTRIN, GLI2, TGFB1, ZBTB42, SAP30, TIMELESS, BCL6B, TGIF1, FABP4, MYC	499	372	13588	1.1712	1	0.932532	99.9826
GOTERM_BP_FAT	GO:0045934~negative regulation of nucleobase, nucleoside, nucleotide and nucleic acid metabolic process	16	2.3845	0.502473	CEBPA, MDFI, TXNIP, SBNO2, TNF, IKZF1, NOSTRIN, GLI2, TGFB1, ZBTB42, SAP30, TIMELESS, BCL6B, TGIF1, FABP4, MYC	499	397	13588	1.09745	1	0.971289	99.9995
GOTERM_BP_FAT	GO:0051172~negative regulation of nitrogen compound metabolic process	16	2.3845	0.510237	CEBPA, MDFI, TXNIP, SBNO2, TNF, IKZF1, NOSTRIN, GLI2, TGFB1, ZBTB42, SAP30, TIMELESS, BCL6B, TGIF1, FABP4, MYC	499	401	13588	1.0865	1	0.972304	99.9997
GOTERM_BP_FAT	GO:0010629~negative regulation of gene expression	16	2.3845	0.540607	CEBPA, MDFI, TXNIP, SBNO2, TNF, IKZF1, NOSTRIN, GLI2, TGFB1, ZBTB42, SAP30, TIMELESS, BCL6B, TGIF1, FABP4, MYC	499	410	13588	1.06265	1	0.978797	99.9999
Annotation Cluster 56	Enrichment Score: 0.6225332710665304
Category	Term	Count	%	PValue	Genes	List Total	Pop Hits	Pop Total	Fold Enrichment	Bonferroni	Benjamini	FDR
GOTERM_BP_FAT	GO:0006826~iron ion transport	5	0.745156	0.0284602	SLC39A14, STEAP4, SLC11A1, LTF, SCARA5	499	32	13588	4.25476	1	0.221355	39.8933
GOTERM_BP_FAT	GO:0006879~cellular iron ion homeostasis	4	0.596125	0.0885458	SLC11A1, HAMP, LTF, SCARA5	499	29	13588	3.75593	1	0.496539	80.497
GOTERM_BP_FAT	GO:0000041~transition metal ion transport	6	0.894188	0.113465	SLC39A14, STEAP4, SLC11A1, LTF, CP, SCARA5	499	70	13588	2.33404	1	0.575044	88.0367
GOTERM_BP_FAT	GO:0055072~iron ion homeostasis	4	0.596125	0.135593	SLC11A1, HAMP, LTF, SCARA5	499	35	13588	3.11205	1	0.633529	92.3386
GOTERM_BP_FAT	GO:0015674~di-, tri-valent inorganic cation transport	8	1.19225	0.377289	SLC39A14, STEAP4, PTPRC, SLC11A1, ATP2C2, LTF, TRPV4, SCARA5	499	161	13588	1.35307	1	0.927463	99.9764
GOTERM_BP_FAT	GO:0006811~ion transport	24	3.57675	0.765331	PTPRC, STEAP4, SLC39A14, SLCO4A1, SLC10A6, CLCNKA, CLIC1, HVCN1, FXYD5, GABRR2, SLC11A1, CYBB, P2RY6, ATP2C2, SLC4A11, SLC25A13, TRPV4, LTF, MCOLN2, CP, CHRNA10, SCARA5, SCN10A, TES	499	712	13588	0.917881	1	0.998594	100
GOTERM_BP_FAT	GO:0030001~metal ion transport	11	1.63934	0.965523	SLC39A14, STEAP4, PTPRC, SLC11A1, ATP2C2, SLC10A6, LTF, TRPV4, CP, SCARA5, SCN10A	499	442	13588	0.677681	1	0.999999	100
GOTERM_BP_FAT	GO:0006812~cation transport	13	1.93741	0.968156	SLC39A14, STEAP4, PTPRC, SLC11A1, ATP2C2, SLC10A6, LTF, TRPV4, CP, HVCN1, SCARA5, CHRNA10, SCN10A	499	515	13588	0.687371	1	0.999999	100
Annotation Cluster 57	Enrichment Score: 0.6050697349319089
Category	Term	Count	%	PValue	Genes	List Total	Pop Hits	Pop Total	Fold Enrichment	Bonferroni	Benjamini	FDR
GOTERM_BP_FAT	GO:0030879~mammary gland development	10	1.49031	0.00417617	XDH, B4GALT1, CEBPB, CSF1, STAT5A, HK2, GLI2, FGF2, TGFB1, TES	499	86	13588	3.16633	0.99997	0.0472557	7.11262
GOTERM_BP_FAT	GO:0001542~ovulation from ovarian follicle	3	0.447094	0.0592338	AGT, NOS3, ADAMTS1	499	11	13588	7.42649	1	0.385363	65.9225
GOTERM_BP_FAT	GO:0030728~ovulation	3	0.447094	0.0800836	AGT, NOS3, ADAMTS1	499	13	13588	6.28395	1	0.469985	77.0458
GOTERM_BP_FAT	GO:0046660~female sex differentiation	6	0.894188	0.0849393	AGT, STAT5A, NOS3, ADAMTS1, FANCA, TGFB1	499	64	13588	2.55286	1	0.486725	79.0907
GOTERM_BP_FAT	GO:0007595~lactation	4	0.596125	0.103356	XDH, STAT5A, HK2, TES	499	31	13588	3.51361	1	0.545576	85.3894
GOTERM_BP_FAT	GO:0008585~female gonad development	5	0.745156	0.128762	AGT, STAT5A, NOS3, ADAMTS1, FANCA	499	53	13588	2.56891	1	0.616174	91.1981
GOTERM_BP_FAT	GO:0046545~development of primary female sexual characteristics	5	0.745156	0.155663	AGT, STAT5A, NOS3, ADAMTS1, FANCA	499	57	13588	2.38864	1	0.678338	94.9367
GOTERM_BP_FAT	GO:0022602~ovulation cycle process	4	0.596125	0.247173	AGT, STAT5A, NOS3, ADAMTS1	499	47	13588	2.31749	1	0.822832	99.33
GOTERM_BP_FAT	GO:0042698~ovulation cycle	4	0.596125	0.257102	AGT, STAT5A, NOS3, ADAMTS1	499	48	13588	2.26921	1	0.835155	99.4698
GOTERM_BP_FAT	GO:0007292~female gamete generation	4	0.596125	0.337748	AGT, NOS3, ADAMTS1, PAQR5	499	56	13588	1.94503	1	0.903672	99.9301
GOTERM_BP_FAT	GO:0048608~reproductive structure development	7	1.04322	0.341765	CD44, AGT, STAT5A, NOS3, ADAMTS1, GLI2, FANCA	499	130	13588	1.46626	1	0.906437	99.9372
GOTERM_BP_FAT	GO:0007548~sex differentiation	7	1.04322	0.341765	B4GALT1, AGT, STAT5A, NOS3, ADAMTS1, FANCA, TGFB1	499	130	13588	1.46626	1	0.906437	99.9372
GOTERM_BP_FAT	GO:0008406~gonad development	5	0.745156	0.404143	AGT, STAT5A, NOS3, ADAMTS1, FANCA	499	88	13588	1.54719	1	0.939144	99.9891
GOTERM_BP_FAT	GO:0001655~urogenital system development	7	1.04322	0.446794	TIMELESS, CD44, AGT, STAT5A, TIPARP, ADAMTS1, GLI2	499	146	13588	1.30557	1	0.955817	99.9971
GOTERM_BP_FAT	GO:0048511~rhythmic process	5	0.745156	0.485803	TIMELESS, AGT, STAT5A, NOS3, ADAMTS1	499	98	13588	1.38931	1	0.967447	99.9992
GOTERM_BP_FAT	GO:0045137~development of primary sexual characteristics	5	0.745156	0.5326	AGT, STAT5A, NOS3, ADAMTS1, FANCA	499	104	13588	1.30916	1	0.977419	99.9998
GOTERM_BP_FAT	GO:0003006~reproductive developmental process	10	1.49031	0.635209	B4GALT1, CD44, AGT, CSF1, STAT5A, NOS3, ADAMTS1, GLI2, FANCA, TGFB1	499	264	13588	1.03146	1	0.991807	100
GOTERM_BP_FAT	GO:0032504~multicellular organism reproduction	12	1.78838	0.88919	XDH, B4GALT1, AGT, STAT5A, S100A11, HK2, NOS3, ADAMTS1, TGFB1, PAQR5, TES, GLI1	499	409	13588	0.798938	1	0.999924	100
GOTERM_BP_FAT	GO:0048609~reproductive process in a multicellular organism	12	1.78838	0.88919	XDH, B4GALT1, AGT, STAT5A, S100A11, HK2, NOS3, ADAMTS1, TGFB1, PAQR5, TES, GLI1	499	409	13588	0.798938	1	0.999924	100
GOTERM_BP_FAT	GO:0019953~sexual reproduction	9	1.34128	0.974499	B4GALT1, AGT, S100A11, NOS3, ADAMTS1, STAT3, TGFB1, PAQR5, GLI1	499	386	13588	0.634907	1	1	100
GOTERM_BP_FAT	GO:0007276~gamete generation	7	1.04322	0.98375	AGT, S100A11, NOS3, ADAMTS1, TGFB1, PAQR5, GLI1	499	331	13588	0.575871	1	1	100
Annotation Cluster 58	Enrichment Score: 0.5736608793136134
Category	Term	Count	%	PValue	Genes	List Total	Pop Hits	Pop Total	Fold Enrichment	Bonferroni	Benjamini	FDR
GOTERM_BP_FAT	GO:0022612~gland morphogenesis	7	1.04322	0.0875908	TNF, CD44, CSF1, STAT5A, TGM2, GLI2, TGFB1	499	84	13588	2.26921	1	0.493648	80.1335
GOTERM_BP_FAT	GO:0060740~prostate gland epithelium morphogenesis	3	0.447094	0.246519	CD44, STAT5A, GLI2	499	26	13588	3.14198	1	0.822646	99.3197
GOTERM_BP_FAT	GO:0060512~prostate gland morphogenesis	3	0.447094	0.260263	CD44, STAT5A, GLI2	499	27	13588	3.02561	1	0.837217	99.5082
GOTERM_BP_FAT	GO:0048608~reproductive structure development	7	1.04322	0.341765	CD44, AGT, STAT5A, NOS3, ADAMTS1, GLI2, FANCA	499	130	13588	1.46626	1	0.906437	99.9372
GOTERM_BP_FAT	GO:0030850~prostate gland development	3	0.447094	0.42119	CD44, STAT5A, GLI2	499	39	13588	2.09465	1	0.946303	99.9935
GOTERM_BP_FAT	GO:0001655~urogenital system development	7	1.04322	0.446794	TIMELESS, CD44, AGT, STAT5A, TIPARP, ADAMTS1, GLI2	499	146	13588	1.30557	1	0.955817	99.9971
Annotation Cluster 59	Enrichment Score: 0.5662439045177012
Category	Term	Count	%	PValue	Genes	List Total	Pop Hits	Pop Total	Fold Enrichment	Bonferroni	Benjamini	FDR
GOTERM_BP_FAT	GO:0045136~development of secondary sexual characteristics	3	0.447094	0.0592338	B4GALT1, STAT5A, TGFB1	499	11	13588	7.42649	1	0.385363	65.9225
GOTERM_BP_FAT	GO:0007548~sex differentiation	7	1.04322	0.341765	B4GALT1, AGT, STAT5A, NOS3, ADAMTS1, FANCA, TGFB1	499	130	13588	1.46626	1	0.906437	99.9372
GOTERM_BP_FAT	GO:0048610~reproductive cellular process	3	0.447094	0.988488	B4GALT1, STAT5A, TGFB1	499	173	13588	0.472205	1	1	100
Annotation Cluster 60	Enrichment Score: 0.5565580838097223
Category	Term	Count	%	PValue	Genes	List Total	Pop Hits	Pop Total	Fold Enrichment	Bonferroni	Benjamini	FDR
GOTERM_BP_FAT	GO:0006090~pyruvate metabolic process	4	0.596125	0.0619478	ATF3, SDS, PDK4, FBP1	499	25	13588	4.35687	1	0.395468	67.6148
GOTERM_BP_FAT	GO:0006094~gluconeogenesis	3	0.447094	0.165445	ATF3, SDS, FBP1	499	20	13588	4.08457	1	0.696714	95.8771
GOTERM_BP_FAT	GO:0019319~hexose biosynthetic process	3	0.447094	0.232802	ATF3, SDS, FBP1	499	25	13588	3.26766	1	0.805924	99.0649
GOTERM_BP_FAT	GO:0019318~hexose metabolic process	9	1.34128	0.28018	B4GALT1, TNF, ATF3, SDS, PFKFB3, PDK4, FBP1, HK2, MYC	499	169	13588	1.45014	1	0.856593	99.6961
GOTERM_BP_FAT	GO:0046364~monosaccharide biosynthetic process	3	0.447094	0.315123	ATF3, SDS, FBP1	499	31	13588	2.63521	1	0.887427	99.8736
GOTERM_BP_FAT	GO:0034637~cellular carbohydrate biosynthetic process	4	0.596125	0.337748	B4GALT1, ATF3, SDS, FBP1	499	56	13588	1.94503	1	0.903672	99.9301
GOTERM_BP_FAT	GO:0046165~alcohol biosynthetic process	3	0.447094	0.395367	ATF3, SDS, FBP1	499	37	13588	2.20788	1	0.936078	99.986
GOTERM_BP_FAT	GO:0005996~monosaccharide metabolic process	9	1.34128	0.401249	B4GALT1, TNF, ATF3, SDS, PFKFB3, PDK4, FBP1, HK2, MYC	499	191	13588	1.28311	1	0.937906	99.9882
GOTERM_BP_FAT	GO:0006006~glucose metabolic process	7	1.04322	0.407511	TNF, ATF3, SDS, PDK4, FBP1, HK2, MYC	499	140	13588	1.36152	1	0.940618	99.9902
GOTERM_BP_FAT	GO:0016051~carbohydrate biosynthetic process	4	0.596125	0.591136	B4GALT1, ATF3, SDS, FBP1	499	83	13588	1.31231	1	0.986799	100
Annotation Cluster 61	Enrichment Score: 0.5554370531064309
Category	Term	Count	%	PValue	Genes	List Total	Pop Hits	Pop Total	Fold Enrichment	Bonferroni	Benjamini	FDR
GOTERM_BP_FAT	GO:0034655~nucleobase, nucleoside, nucleotide and nucleic acid catabolic process	6	0.894188	0.00955792	NCF2, NCF1, UPP1, NT5E, PNP, ADA	499	36	13588	4.53841	1	0.0943545	15.5763
GOTERM_BP_FAT	GO:0034656~nucleobase, nucleoside and nucleotide catabolic process	6	0.894188	0.00955792	NCF2, NCF1, UPP1, NT5E, PNP, ADA	499	36	13588	4.53841	1	0.0943545	15.5763
GOTERM_BP_FAT	GO:0044270~nitrogen compound catabolic process	6	0.894188	0.0180421	NCF2, NCF1, UPP1, NT5E, PNP, ADA	499	42	13588	3.89007	1	0.158163	27.4574
GOTERM_BP_FAT	GO:0009166~nucleotide catabolic process	5	0.745156	0.0256219	NCF2, NCF1, UPP1, NT5E, ADA	499	31	13588	4.39201	1	0.203955	36.7211
GOTERM_BP_FAT	GO:0046700~heterocycle catabolic process	5	0.745156	0.0870896	HDC, NT5E, PNP, ADA, PRODH	499	46	13588	2.95983	1	0.492608	79.9403
GOTERM_BP_FAT	GO:0009119~ribonucleoside metabolic process	4	0.596125	0.170755	UPP1, NT5E, PNP, ADA	499	39	13588	2.79287	1	0.705425	96.3159
GOTERM_BP_FAT	GO:0042278~purine nucleoside metabolic process	3	0.447094	0.219134	NT5E, PNP, ADA	499	24	13588	3.40381	1	0.785996	98.7234
GOTERM_BP_FAT	GO:0046128~purine ribonucleoside metabolic process	3	0.447094	0.219134	NT5E, PNP, ADA	499	24	13588	3.40381	1	0.785996	98.7234
GOTERM_BP_FAT	GO:0009116~nucleoside metabolic process	4	0.596125	0.337748	UPP1, NT5E, PNP, ADA	499	56	13588	1.94503	1	0.903672	99.9301
GOTERM_BP_FAT	GO:0044271~nitrogen compound biosynthetic process	13	1.93741	0.427848	CEBPA, ADCY4, ATP2C2, CTH, HDC, NOS3, NOS2, NT5E, PNP, ADA, MOCS1, CBS, PRODH	499	302	13588	1.17217	1	0.948875	99.9947
GOTERM_BP_FAT	GO:0009123~nucleoside monophosphate metabolic process	3	0.447094	0.642172	ADCY4, NT5E, ADA	499	59	13588	1.3846	1	0.992243	100
GOTERM_BP_FAT	GO:0006164~purine nucleotide biosynthetic process	5	0.745156	0.744575	ADCY4, ATP2C2, NT5E, PNP, ADA	499	137	13588	0.993812	1	0.998049	100
GOTERM_BP_FAT	GO:0009150~purine ribonucleotide metabolic process	4	0.596125	0.816781	ATP2C2, NT5E, PNP, ADA	499	119	13588	0.91531	1	0.999474	100
GOTERM_BP_FAT	GO:0009259~ribonucleotide metabolic process	4	0.596125	0.841763	ATP2C2, NT5E, PNP, ADA	499	125	13588	0.871375	1	0.999701	100
GOTERM_BP_FAT	GO:0006163~purine nucleotide metabolic process	5	0.745156	0.842908	ADCY4, ATP2C2, NT5E, PNP, ADA	499	160	13588	0.850952	1	0.999706	100
GOTERM_BP_FAT	GO:0009165~nucleotide biosynthetic process	5	0.745156	0.885563	ADCY4, ATP2C2, NT5E, PNP, ADA	499	174	13588	0.782485	1	0.999915	100
GOTERM_BP_FAT	GO:0034654~nucleobase, nucleoside, nucleotide and nucleic acid biosynthetic process	5	0.745156	0.898152	ADCY4, ATP2C2, NT5E, PNP, ADA	499	179	13588	0.760627	1	0.999943	100
GOTERM_BP_FAT	GO:0034404~nucleobase, nucleoside and nucleotide biosynthetic process	5	0.745156	0.898152	ADCY4, ATP2C2, NT5E, PNP, ADA	499	179	13588	0.760627	1	0.999943	100
GOTERM_BP_FAT	GO:0009144~purine nucleoside triphosphate metabolic process	3	0.447094	0.904738	ATP2C2, PNP, ADA	499	106	13588	0.770673	1	0.999955	100
GOTERM_BP_FAT	GO:0009152~purine ribonucleotide biosynthetic process	3	0.447094	0.907557	ATP2C2, PNP, ADA	499	107	13588	0.763471	1	0.999959	100
GOTERM_BP_FAT	GO:0009260~ribonucleotide biosynthetic process	3	0.447094	0.918069	ATP2C2, PNP, ADA	499	111	13588	0.735958	1	0.999974	100
GOTERM_BP_FAT	GO:0009141~nucleoside triphosphate metabolic process	3	0.447094	0.92745	ATP2C2, PNP, ADA	499	115	13588	0.71036	1	0.999983	100
Annotation Cluster 62	Enrichment Score: 0.5418213937547472
Category	Term	Count	%	PValue	Genes	List Total	Pop Hits	Pop Total	Fold Enrichment	Bonferroni	Benjamini	FDR
GOTERM_BP_FAT	GO:0010817~regulation of hormone levels	9	1.34128	0.0982273	ADORA3, APOA1, CYP1B1, SLCO4A1, AGT, IL1RN, MC4R, TRPV4, RETSAT	499	128	13588	1.91464	1	0.529552	83.8439
GOTERM_BP_FAT	GO:0042445~hormone metabolic process	5	0.745156	0.420745	APOA1, CYP1B1, SLCO4A1, AGT, RETSAT	499	90	13588	1.5128	1	0.94642	99.9934
GOTERM_BP_FAT	GO:0034754~cellular hormone metabolic process	3	0.447094	0.573172	APOA1, CYP1B1, RETSAT	499	52	13588	1.57099	1	0.984005	100
Annotation Cluster 63	Enrichment Score: 0.532196816471526
Category	Term	Count	%	PValue	Genes	List Total	Pop Hits	Pop Total	Fold Enrichment	Bonferroni	Benjamini	FDR
GOTERM_BP_FAT	GO:0048754~branching morphogenesis of a tube	8	1.19225	0.0543549	B4GALT1, TIMELESS, CD44, AGT, CSF1, NOTCH4, GLI2, TGFB1	499	93	13588	2.34241	1	0.363185	62.6686
GOTERM_BP_FAT	GO:0060675~ureteric bud morphogenesis	3	0.447094	0.274014	TIMELESS, CD44, AGT	499	28	13588	2.91755	1	0.852573	99.6467
GOTERM_BP_FAT	GO:0001658~branching involved in ureteric bud morphogenesis	3	0.447094	0.274014	TIMELESS, CD44, AGT	499	28	13588	2.91755	1	0.852573	99.6467
GOTERM_BP_FAT	GO:0001822~kidney development	6	0.894188	0.355437	TIMELESS, CD44, AGT, TIPARP, ADAMTS1, GLI2	499	107	13588	1.52694	1	0.915512	99.9566
GOTERM_BP_FAT	GO:0001655~urogenital system development	7	1.04322	0.446794	TIMELESS, CD44, AGT, STAT5A, TIPARP, ADAMTS1, GLI2	499	146	13588	1.30557	1	0.955817	99.9971
GOTERM_BP_FAT	GO:0001657~ureteric bud development	3	0.447094	0.458825	TIMELESS, CD44, AGT	499	42	13588	1.94503	1	0.96011	99.998
GOTERM_BP_FAT	GO:0001656~metanephros development	3	0.447094	0.63288	TIMELESS, CD44, AGT	499	58	13588	1.40847	1	0.991632	100
Annotation Cluster 64	Enrichment Score: 0.5156379470370244
Category	Term	Count	%	PValue	Genes	List Total	Pop Hits	Pop Total	Fold Enrichment	Bonferroni	Benjamini	FDR
GOTERM_BP_FAT	GO:0030336~negative regulation of cell migration	3	0.447094	0.274014	ROBO4, ARAP3, ADA	499	28	13588	2.91755	1	0.852573	99.6467
GOTERM_BP_FAT	GO:0040013~negative regulation of locomotion	3	0.447094	0.315123	ROBO4, ARAP3, ADA	499	31	13588	2.63521	1	0.887427	99.8736
GOTERM_BP_FAT	GO:0051271~negative regulation of cell motion	3	0.447094	0.328725	ROBO4, ARAP3, ADA	499	32	13588	2.55286	1	0.896515	99.9113
Annotation Cluster 65	Enrichment Score: 0.49153008891140026
Category	Term	Count	%	PValue	Genes	List Total	Pop Hits	Pop Total	Fold Enrichment	Bonferroni	Benjamini	FDR
GOTERM_BP_FAT	GO:0030029~actin filament-based process	10	1.49031	0.197903	RHOJ, SHROOM1, NUAK2, RAC2, S100A9, FHL3, FLNC, WAS, VASP, LCP1	499	176	13588	1.54719	1	0.753182	97.9514
GOTERM_BP_FAT	GO:0030036~actin cytoskeleton organization	9	1.34128	0.25919	RHOJ, SHROOM1, NUAK2, RAC2, S100A9, FHL3, WAS, VASP, LCP1	499	165	13588	1.4853	1	0.837226	99.4955
GOTERM_BP_FAT	GO:0007010~cytoskeleton organization	12	1.78838	0.65364	RHOJ, SHROOM1, NDE1, NUAK2, RAC2, S100A9, FHL3, TEKT4, WAS, VASP, LCP1, TES	499	326	13588	1.00235	1	0.993158	100
Annotation Cluster 66	Enrichment Score: 0.4906878334401783
Category	Term	Count	%	PValue	Genes	List Total	Pop Hits	Pop Total	Fold Enrichment	Bonferroni	Benjamini	FDR
GOTERM_BP_FAT	GO:0015837~amine transport	6	0.894188	0.247954	SLC1A5, SLC11A1, ADORA3, SLC25A13, FCGR3, SLC7A7	499	92	13588	1.7759	1	0.8232	99.3422
GOTERM_BP_FAT	GO:0046942~carboxylic acid transport	6	0.894188	0.297331	SLC1A5, SLC11A1, SLC25A13, PLIN2, ANXA1, SLC7A7	499	99	13588	1.65033	1	0.871937	99.8013
GOTERM_BP_FAT	GO:0015849~organic acid transport	6	0.894188	0.304523	SLC1A5, SLC11A1, SLC25A13, PLIN2, ANXA1, SLC7A7	499	100	13588	1.63383	1	0.877593	99.8343
GOTERM_BP_FAT	GO:0006865~amino acid transport	4	0.596125	0.485308	SLC1A5, SLC11A1, SLC25A13, SLC7A7	499	71	13588	1.53411	1	0.967517	99.9992
Annotation Cluster 67	Enrichment Score: 0.45180246581198436
Category	Term	Count	%	PValue	Genes	List Total	Pop Hits	Pop Total	Fold Enrichment	Bonferroni	Benjamini	FDR
GOTERM_BP_FAT	GO:0051258~protein polymerization	5	0.745156	0.057685	FGA, TUBB6, WAS, TUBA1C, TES	499	40	13588	3.40381	1	0.378198	64.9198
GOTERM_BP_FAT	GO:0051259~protein oligomerization	6	0.894188	0.123877	VWF, NOD2, H2-D1, TGM2, FAS, SCARA5	499	72	13588	2.26921	1	0.604057	90.2862
GOTERM_BP_FAT	GO:0051260~protein homooligomerization	5	0.745156	0.128762	VWF, H2-D1, TGM2, FAS, SCARA5	499	53	13588	2.56891	1	0.616174	91.1981
GOTERM_BP_FAT	GO:0006461~protein complex assembly	12	1.78838	0.210948	VWF, NOD2, FGA, H2-D1, TGM2, TUBB6, FAS, WAS, SCARA5, MYC, TUBA1C, TES	499	227	13588	1.4395	1	0.773316	98.4657
GOTERM_BP_FAT	GO:0070271~protein complex biogenesis	12	1.78838	0.210948	VWF, NOD2, FGA, H2-D1, TGM2, TUBB6, FAS, WAS, SCARA5, MYC, TUBA1C, TES	499	227	13588	1.4395	1	0.773316	98.4657
GOTERM_BP_FAT	GO:0043623~cellular protein complex assembly	5	0.745156	0.562597	FGA, TUBB6, WAS, TUBA1C, TES	499	108	13588	1.26067	1	0.982407	100
GOTERM_BP_FAT	GO:0065003~macromolecular complex assembly	12	1.78838	0.699372	VWF, NOD2, FGA, H2-D1, TGM2, TUBB6, FAS, WAS, SCARA5, MYC, TUBA1C, TES	499	338	13588	0.966762	1	0.996175	100
GOTERM_BP_FAT	GO:0043933~macromolecular complex subunit organization	12	1.78838	0.79356	VWF, NOD2, FGA, H2-D1, TGM2, TUBB6, FAS, WAS, SCARA5, MYC, TUBA1C, TES	499	367	13588	0.890369	1	0.999161	100
GOTERM_BP_FAT	GO:0007017~microtubule-based process	6	0.894188	0.890409	KIF23, NDE1, TUBB6, TEKT4, TUBA1C, TES	499	211	13588	0.774326	1	0.999926	100
GOTERM_BP_FAT	GO:0034622~cellular macromolecular complex assembly	5	0.745156	0.960046	FGA, TUBB6, WAS, TUBA1C, TES	499	217	13588	0.62743	1	0.999998	100
GOTERM_BP_FAT	GO:0034621~cellular macromolecular complex subunit organization	5	0.745156	0.980881	FGA, TUBB6, WAS, TUBA1C, TES	499	245	13588	0.555724	1	1	100
Annotation Cluster 68	Enrichment Score: 0.34392857897984186
Category	Term	Count	%	PValue	Genes	List Total	Pop Hits	Pop Total	Fold Enrichment	Bonferroni	Benjamini	FDR
GOTERM_BP_FAT	GO:0009310~amine catabolic process	5	0.745156	0.214793	SAT1, HDC, SMOX, NOS2, PRODH	499	65	13588	2.09465	1	0.779311	98.5923
GOTERM_BP_FAT	GO:0006576~biogenic amine metabolic process	4	0.596125	0.566011	PNPLA7, SAT1, HDC, SMOX	499	80	13588	1.36152	1	0.982796	100
GOTERM_BP_FAT	GO:0006575~cellular amino acid derivative metabolic process	5	0.745156	0.764485	PNPLA7, SAT1, HDC, STAT5A, SMOX	499	141	13588	0.965619	1	0.998587	100
Annotation Cluster 69	Enrichment Score: 0.3155723015604952
Category	Term	Count	%	PValue	Genes	List Total	Pop Hits	Pop Total	Fold Enrichment	Bonferroni	Benjamini	FDR
GOTERM_BP_FAT	GO:0050679~positive regulation of epithelial cell proliferation	3	0.447094	0.315123	B4GALT1, FGF2, TGFB1	499	31	13588	2.63521	1	0.887427	99.8736
GOTERM_BP_FAT	GO:0060284~regulation of cell development	7	1.04322	0.52954	B4GALT1, TGIF1, RHOC, GLI2, IGFBP3, FGF2, TGFB1	499	159	13588	1.19883	1	0.977023	99.9998
GOTERM_BP_FAT	GO:0050678~regulation of epithelial cell proliferation	3	0.447094	0.677491	B4GALT1, FGF2, TGFB1	499	63	13588	1.29669	1	0.994858	100
Annotation Cluster 70	Enrichment Score: 0.3027674080610376
Category	Term	Count	%	PValue	Genes	List Total	Pop Hits	Pop Total	Fold Enrichment	Bonferroni	Benjamini	FDR
GOTERM_BP_FAT	GO:0016042~lipid catabolic process	7	1.04322	0.368017	PNPLA7, PLCE1, SMPDL3B, ASPG, PLA1A, PNPLA2, PLA2G3	499	134	13588	1.42249	1	0.922165	99.9694
GOTERM_BP_FAT	GO:0019637~organophosphate metabolic process	8	1.19225	0.467408	PNPLA7, PIK3CG, APOA1, SMPDL3B, NCF2, NCF1, ASPG, PLA2G3	499	176	13588	1.23775	1	0.962806	99.9985
GOTERM_BP_FAT	GO:0006644~phospholipid metabolic process	6	0.894188	0.718015	PNPLA7, PIK3CG, APOA1, SMPDL3B, ASPG, PLA2G3	499	163	13588	1.00235	1	0.997062	100
Annotation Cluster 71	Enrichment Score: 0.29829183248645025
Category	Term	Count	%	PValue	Genes	List Total	Pop Hits	Pop Total	Fold Enrichment	Bonferroni	Benjamini	FDR
GOTERM_BP_FAT	GO:0000060~protein import into nucleus, translocation	3	0.447094	0.139591	SLC11A1, NFKBIA, TGFB1	499	18	13588	4.53841	1	0.643017	92.9399
GOTERM_BP_FAT	GO:0006606~protein import into nucleus	4	0.596125	0.337748	TXNIP, SLC11A1, NFKBIA, TGFB1	499	56	13588	1.94503	1	0.903672	99.9301
GOTERM_BP_FAT	GO:0051170~nuclear import	4	0.596125	0.357964	TXNIP, SLC11A1, NFKBIA, TGFB1	499	58	13588	1.87796	1	0.916426	99.9595
GOTERM_BP_FAT	GO:0006605~protein targeting	7	1.04322	0.361441	TXNIP, CCHCR1, SLC11A1, MLPH, AKAP12, NFKBIA, TGFB1	499	133	13588	1.43318	1	0.918471	99.9632
GOTERM_BP_FAT	GO:0034504~protein localization in nucleus	4	0.596125	0.388109	TXNIP, SLC11A1, NFKBIA, TGFB1	499	61	13588	1.7856	1	0.932172	99.9827
GOTERM_BP_FAT	GO:0006913~nucleocytoplasmic transport	5	0.745156	0.469786	TXNIP, CCHCR1, SLC11A1, NFKBIA, TGFB1	499	96	13588	1.41825	1	0.963412	99.9986
GOTERM_BP_FAT	GO:0033365~protein localization in organelle	5	0.745156	0.477818	TXNIP, SLC11A1, NFKBIA, TGFB1, SRGN	499	97	13588	1.40363	1	0.965488	99.9989
GOTERM_BP_FAT	GO:0051169~nuclear transport	5	0.745156	0.485803	TXNIP, CCHCR1, SLC11A1, NFKBIA, TGFB1	499	98	13588	1.38931	1	0.967447	99.9992
GOTERM_BP_FAT	GO:0034613~cellular protein localization	12	1.78838	0.538532	TXNIP, CCHCR1, SLC11A1, AP1G2, MLPH, TAP2, AKAP12, NFKBIA, PMAIP1, STX11, TGFB1, SRGN	499	299	13588	1.09286	1	0.978648	99.9999
GOTERM_BP_FAT	GO:0070727~cellular macromolecule localization	12	1.78838	0.547536	TXNIP, CCHCR1, SLC11A1, AP1G2, MLPH, TAP2, AKAP12, NFKBIA, PMAIP1, STX11, TGFB1, SRGN	499	301	13588	1.0856	1	0.97987	99.9999
GOTERM_BP_FAT	GO:0017038~protein import	4	0.596125	0.582866	TXNIP, SLC11A1, NFKBIA, TGFB1	499	82	13588	1.32832	1	0.985575	100
GOTERM_BP_FAT	GO:0006886~intracellular protein transport	10	1.49031	0.686758	TXNIP, CCHCR1, SLC11A1, AP1G2, MLPH, TAP2, AKAP12, NFKBIA, STX11, TGFB1	499	276	13588	0.986611	1	0.995465	100
GOTERM_BP_FAT	GO:0046907~intracellular transport	14	2.08644	0.802206	TXNIP, CCHCR1, SLC11A1, NDE1, SLC25A13, AP1G2, MLPH, UCP2, TAP2, AKAP12, NFKBIA, STX11, WAS, TGFB1	499	431	13588	0.884516	1	0.999289	100
GOTERM_BP_FAT	GO:0015031~protein transport	20	2.98063	0.876474	TXNIP, APOBEC1, MSR1, PLEK, AP1G2, MLPH, AKAP12, NFKBIA, NLRP3, TGFB1, TRAF3IP2, CCHCR1, RAB32, SLC11A1, TAP2, TAP1, STX11, RAB20, SLC15A3, LCP2	499	651	13588	0.836573	1	0.999886	100
GOTERM_BP_FAT	GO:0045184~establishment of protein localization	20	2.98063	0.883983	TXNIP, APOBEC1, MSR1, PLEK, AP1G2, MLPH, AKAP12, NFKBIA, NLRP3, TGFB1, TRAF3IP2, CCHCR1, RAB32, SLC11A1, TAP2, TAP1, STX11, RAB20, SLC15A3, LCP2	499	656	13588	0.830197	1	0.999912	100
GOTERM_BP_FAT	GO:0008104~protein localization	23	3.42772	0.89117	TXNIP, APOBEC1, MSR1, PLEK, AP1G2, MLPH, AKAP12, NFKBIA, PMAIP1, NLRP3, TGFB1, TRAF3IP2, CCHCR1, RAB32, SLC11A1, APOA1, TAP2, TAP1, STX11, RAB20, SLC15A3, SRGN, LCP2	499	753	13588	0.831741	1	0.999927	100
Annotation Cluster 72	Enrichment Score: 0.2791959801755911
Category	Term	Count	%	PValue	Genes	List Total	Pop Hits	Pop Total	Fold Enrichment	Bonferroni	Benjamini	FDR
GOTERM_BP_FAT	GO:0032956~regulation of actin cytoskeleton organization	4	0.596125	0.378093	ARPC1B, PLEK, CAPG, MYO1F	499	60	13588	1.81536	1	0.927558	99.9769
GOTERM_BP_FAT	GO:0032970~regulation of actin filament-based process	4	0.596125	0.388109	ARPC1B, PLEK, CAPG, MYO1F	499	61	13588	1.7856	1	0.932172	99.9827
GOTERM_BP_FAT	GO:0043254~regulation of protein complex assembly	4	0.596125	0.427728	ARPC1B, PLEK, CAPG, TES	499	65	13588	1.67572	1	0.949144	99.9947
GOTERM_BP_FAT	GO:0051493~regulation of cytoskeleton organization	5	0.745156	0.493739	ARPC1B, PLEK, CAPG, MYO1F, TES	499	99	13588	1.37528	1	0.969296	99.9994
GOTERM_BP_FAT	GO:0033043~regulation of organelle organization	7	1.04322	0.498231	ARPC1B, TNF, PLEK, CAPG, MYO1F, TGFB1, TES	499	154	13588	1.23775	1	0.970237	99.9995
GOTERM_BP_FAT	GO:0008064~regulation of actin polymerization or depolymerization	3	0.447094	0.551761	ARPC1B, PLEK, CAPG	499	50	13588	1.63383	1	0.980628	99.9999
GOTERM_BP_FAT	GO:0030832~regulation of actin filament length	3	0.447094	0.56256	ARPC1B, PLEK, CAPG	499	51	13588	1.60179	1	0.98254	100
GOTERM_BP_FAT	GO:0032271~regulation of protein polymerization	3	0.447094	0.6234	ARPC1B, CAPG, TES	499	57	13588	1.43318	1	0.990718	100
GOTERM_BP_FAT	GO:0044087~regulation of cellular component biogenesis	4	0.596125	0.638493	ARPC1B, PLEK, CAPG, TES	499	89	13588	1.22384	1	0.992006	100
GOTERM_BP_FAT	GO:0032535~regulation of cellular component size	5	0.745156	0.846348	ARPC1B, PLEK, CAPG, TGFB1, EMP1	499	161	13588	0.845666	1	0.99973	100
Annotation Cluster 73	Enrichment Score: 0.2713359152683595
Category	Term	Count	%	PValue	Genes	List Total	Pop Hits	Pop Total	Fold Enrichment	Bonferroni	Benjamini	FDR
GOTERM_BP_FAT	GO:0009310~amine catabolic process	5	0.745156	0.214793	SAT1, HDC, SMOX, NOS2, PRODH	499	65	13588	2.09465	1	0.779311	98.5923
GOTERM_BP_FAT	GO:0009063~cellular amino acid catabolic process	3	0.447094	0.59383	HDC, NOS2, PRODH	499	54	13588	1.5128	1	0.987106	100
GOTERM_BP_FAT	GO:0016054~organic acid catabolic process	3	0.447094	0.802577	HDC, NOS2, PRODH	499	81	13588	1.00854	1	0.999286	100
GOTERM_BP_FAT	GO:0046395~carboxylic acid catabolic process	3	0.447094	0.802577	HDC, NOS2, PRODH	499	81	13588	1.00854	1	0.999286	100
Annotation Cluster 74	Enrichment Score: 0.24671934161075745
Category	Term	Count	%	PValue	Genes	List Total	Pop Hits	Pop Total	Fold Enrichment	Bonferroni	Benjamini	FDR
GOTERM_BP_FAT	GO:0008203~cholesterol metabolic process	4	0.596125	0.475896	SOAT2, APOA1, SAA1, CH25H	499	70	13588	1.55603	1	0.96507	99.9989
GOTERM_BP_FAT	GO:0016125~sterol metabolic process	4	0.596125	0.539963	SOAT2, APOA1, SAA1, CH25H	499	77	13588	1.41457	1	0.978813	99.9999
GOTERM_BP_FAT	GO:0008202~steroid metabolic process	6	0.894188	0.70789	SOAT2, APOA1, CYP1B1, SAA1, CH25H, SULT1A1	499	161	13588	1.0148	1	0.99658	100
Annotation Cluster 75	Enrichment Score: 0.20559993443242924
Category	Term	Count	%	PValue	Genes	List Total	Pop Hits	Pop Total	Fold Enrichment	Bonferroni	Benjamini	FDR
GOTERM_BP_FAT	GO:0050880~regulation of blood vessel size	3	0.447094	0.529604	AGT, NOS3, TES	499	48	13588	1.7019	1	0.976864	99.9998
GOTERM_BP_FAT	GO:0035150~regulation of tube size	3	0.447094	0.529604	AGT, NOS3, TES	499	48	13588	1.7019	1	0.976864	99.9998
GOTERM_BP_FAT	GO:0003018~vascular process in circulatory system	3	0.447094	0.551761	AGT, NOS3, TES	499	50	13588	1.63383	1	0.980628	99.9999
GOTERM_BP_FAT	GO:0003013~circulatory system process	4	0.596125	0.778348	PTGS2, AGT, NOS3, TES	499	111	13588	0.981278	1	0.998859	100
GOTERM_BP_FAT	GO:0008015~blood circulation	4	0.596125	0.778348	PTGS2, AGT, NOS3, TES	499	111	13588	0.981278	1	0.998859	100
Annotation Cluster 76	Enrichment Score: 0.15082004384502945
Category	Term	Count	%	PValue	Genes	List Total	Pop Hits	Pop Total	Fold Enrichment	Bonferroni	Benjamini	FDR
GOTERM_BP_FAT	GO:0009953~dorsal/ventral pattern formation	4	0.596125	0.4179	MDFI, TGIF1, GLI2, GLI1	499	64	13588	1.7019	1	0.945338	99.9928
GOTERM_BP_FAT	GO:0051960~regulation of nervous system development	6	0.894188	0.636014	TGIF1, RHOC, GLI2, FGF2, TGFB1, GLI1	499	148	13588	1.10394	1	0.991818	100
GOTERM_BP_FAT	GO:0003002~regionalization	5	0.745156	0.956857	MDFI, IFITM1, TGIF1, GLI2, GLI1	499	214	13588	0.636226	1	0.999998	100
GOTERM_BP_FAT	GO:0007389~pattern specification process	6	0.894188	0.980242	MDFI, IFITM1, NOTCH4, TGIF1, GLI2, GLI1	499	284	13588	0.575291	1	1	100
Annotation Cluster 77	Enrichment Score: 0.1459672930143018
Category	Term	Count	%	PValue	Genes	List Total	Pop Hits	Pop Total	Fold Enrichment	Bonferroni	Benjamini	FDR
GOTERM_BP_FAT	GO:0060284~regulation of cell development	7	1.04322	0.52954	B4GALT1, TGIF1, RHOC, GLI2, IGFBP3, FGF2, TGFB1	499	159	13588	1.19883	1	0.977023	99.9998
GOTERM_BP_FAT	GO:0051960~regulation of nervous system development	6	0.894188	0.636014	TGIF1, RHOC, GLI2, FGF2, TGFB1, GLI1	499	148	13588	1.10394	1	0.991818	100
GOTERM_BP_FAT	GO:0050767~regulation of neurogenesis	4	0.596125	0.867136	TGIF1, RHOC, GLI2, TGFB1	499	132	13588	0.825165	1	0.999848	100
GOTERM_BP_FAT	GO:0045664~regulation of neuron differentiation	3	0.447094	0.892644	TGIF1, RHOC, GLI2	499	102	13588	0.800896	1	0.99993	100
Annotation Cluster 78	Enrichment Score: 0.1329809593243918
Category	Term	Count	%	PValue	Genes	List Total	Pop Hits	Pop Total	Fold Enrichment	Bonferroni	Benjamini	FDR
GOTERM_BP_FAT	GO:0035023~regulation of Rho protein signal transduction	4	0.596125	0.615305	PLEKHG4, ARAP3, VAV1, SPATA13	499	86	13588	1.26653	1	0.989812	100
GOTERM_BP_FAT	GO:0046578~regulation of Ras protein signal transduction	7	1.04322	0.65592	PLEKHG4, PLCE1, CSF1, ASAP3, ARAP3, VAV1, SPATA13	499	181	13588	1.05311	1	0.993304	100
GOTERM_BP_FAT	GO:0051056~regulation of small GTPase mediated signal transduction	7	1.04322	0.846465	PLEKHG4, PLCE1, CSF1, ASAP3, ARAP3, VAV1, SPATA13	499	228	13588	0.836023	1	0.999727	100
GOTERM_BP_FAT	GO:0043087~regulation of GTPase activity	3	0.447094	0.860053	ASAP3, ARAP3, VAV1	499	93	13588	0.878402	1	0.999812	100
Annotation Cluster 79	Enrichment Score: 0.07293022611673358
Category	Term	Count	%	PValue	Genes	List Total	Pop Hits	Pop Total	Fold Enrichment	Bonferroni	Benjamini	FDR
GOTERM_BP_FAT	GO:0048562~embryonic organ morphogenesis	7	1.04322	0.541839	MDFI, GJB6, GLI2, MYC, CHRNA10, EPHA2, GLI1	499	161	13588	1.18393	1	0.978916	99.9999
GOTERM_BP_FAT	GO:0042471~ear morphogenesis	3	0.447094	0.772976	GJB6, MYC, CHRNA10	499	76	13588	1.07489	1	0.99876	100
GOTERM_BP_FAT	GO:0007605~sensory perception of sound	3	0.447094	0.818649	GJB6, MYC, CHRNA10	499	84	13588	0.972516	1	0.999491	100
GOTERM_BP_FAT	GO:0007423~sensory organ development	8	1.19225	0.836314	GABRR2, IKZF1, TGIF1, GJB6, MYC, CHRNA10, STAT3, TGFB1	499	257	13588	0.847641	1	0.999663	100
GOTERM_BP_FAT	GO:0050954~sensory perception of mechanical stimulus	3	0.447094	0.85592	GJB6, MYC, CHRNA10	499	92	13588	0.88795	1	0.99979	100
GOTERM_BP_FAT	GO:0043583~ear development	3	0.447094	0.898859	GJB6, MYC, CHRNA10	499	104	13588	0.785494	1	0.999944	100
GOTERM_BP_FAT	GO:0050890~cognition	6	0.894188	1	GABRR2, ITGA5, GJB6, OLFR920, MYC, CHRNA10	499	1480	13588	0.110394	1	1	100
GOTERM_BP_FAT	GO:0007600~sensory perception	5	0.745156	1	GABRR2, GJB6, OLFR920, MYC, CHRNA10	499	1402	13588	0.0971129	1	1	100
GOTERM_BP_FAT	GO:0050877~neurological system process	11	1.63934	1	GABRR2, ITGA5, AGT, LGI4, TIMP4, GJB6, OLFR920, MYC, CHRNA10, TGFB1, TES	499	1681	13588	0.178189	1	1	100
Annotation Cluster 80	Enrichment Score: 0.059232258877477156
Category	Term	Count	%	PValue	Genes	List Total	Pop Hits	Pop Total	Fold Enrichment	Bonferroni	Benjamini	FDR
GOTERM_BP_FAT	GO:0001654~eye development	5	0.745156	0.832199	GABRR2, IKZF1, TGIF1, STAT3, TGFB1	499	157	13588	0.867212	1	0.999634	100
GOTERM_BP_FAT	GO:0007423~sensory organ development	8	1.19225	0.836314	GABRR2, IKZF1, TGIF1, GJB6, MYC, CHRNA10, STAT3, TGFB1	499	257	13588	0.847641	1	0.999663	100
GOTERM_BP_FAT	GO:0043010~camera-type eye development	3	0.447094	0.954348	IKZF1, TGIF1, TGFB1	499	130	13588	0.628395	1	0.999997	100
Annotation Cluster 81	Enrichment Score: 0.05612792222405906
Category	Term	Count	%	PValue	Genes	List Total	Pop Hits	Pop Total	Fold Enrichment	Bonferroni	Benjamini	FDR
GOTERM_BP_FAT	GO:0006366~transcription from RNA polymerase II promoter	3	0.447094	0.760091	HIF3A, MYC, STAT3	499	74	13588	1.10394	1	0.998482	100
GOTERM_BP_FAT	GO:0006351~transcription, DNA-dependent	3	0.447094	0.941475	HIF3A, MYC, STAT3	499	122	13588	0.669601	1	0.999993	100
GOTERM_BP_FAT	GO:0032774~RNA biosynthetic process	3	0.447094	0.948292	HIF3A, MYC, STAT3	499	126	13588	0.648344	1	0.999995	100
Annotation Cluster 82	Enrichment Score: 0.019590831854146628
Category	Term	Count	%	PValue	Genes	List Total	Pop Hits	Pop Total	Fold Enrichment	Bonferroni	Benjamini	FDR
GOTERM_BP_FAT	GO:0009057~macromolecule catabolic process	19	2.83159	0.92109	CAST, ZFP36, SPSB1, SOCS3, PGLYRP1, UBA7, OAS2, PSMB8, PSMB9, RNF125, UHRF1, USP18, ISG15, UBD, FBXL22, TNFAIP3, NEURL3, MYC, UBE2T	499	654	13588	0.791099	1	0.999977	100
GOTERM_BP_FAT	GO:0044265~cellular macromolecule catabolic process	17	2.53353	0.939755	ZFP36, SPSB1, SOCS3, UBA7, OAS2, PSMB8, PSMB9, RNF125, UHRF1, USP18, ISG15, UBD, FBXL22, TNFAIP3, NEURL3, MYC, UBE2T	499	609	13588	0.760128	1	0.999992	100
GOTERM_BP_FAT	GO:0030163~protein catabolic process	15	2.23547	0.950134	CAST, SPSB1, SOCS3, UBA7, PSMB8, PSMB9, RNF125, UHRF1, USP18, ISG15, UBD, FBXL22, TNFAIP3, NEURL3, UBE2T	499	556	13588	0.734635	1	0.999996	100
GOTERM_BP_FAT	GO:0051603~proteolysis involved in cellular protein catabolic process	14	2.08644	0.958633	SPSB1, SOCS3, UBA7, PSMB8, PSMB9, RNF125, UHRF1, USP18, ISG15, UBD, FBXL22, TNFAIP3, NEURL3, UBE2T	499	534	13588	0.713907	1	0.999998	100
GOTERM_BP_FAT	GO:0044257~cellular protein catabolic process	14	2.08644	0.960724	SPSB1, SOCS3, UBA7, PSMB8, PSMB9, RNF125, UHRF1, USP18, ISG15, UBD, FBXL22, TNFAIP3, NEURL3, UBE2T	499	537	13588	0.709919	1	0.999998	100
GOTERM_BP_FAT	GO:0019941~modification-dependent protein catabolic process	12	1.78838	0.981196	RNF125, UHRF1, USP18, ISG15, SPSB1, SOCS3, UBA7, UBD, FBXL22, TNFAIP3, NEURL3, UBE2T	499	508	13588	0.643239	1	1	100
GOTERM_BP_FAT	GO:0043632~modification-dependent macromolecule catabolic process	12	1.78838	0.981196	RNF125, UHRF1, USP18, ISG15, SPSB1, SOCS3, UBA7, UBD, FBXL22, TNFAIP3, NEURL3, UBE2T	499	508	13588	0.643239	1	1	100
Annotation Cluster 83	Enrichment Score: 0.0015917163546279862
Category	Term	Count	%	PValue	Genes	List Total	Pop Hits	Pop Total	Fold Enrichment	Bonferroni	Benjamini	FDR
GOTERM_BP_FAT	GO:0000280~nuclear division	3	0.447094	0.993426	NDE1, TIMELESS, SPAG5	499	190	13588	0.429955	1	1	100
GOTERM_BP_FAT	GO:0007067~mitosis	3	0.447094	0.993426	NDE1, TIMELESS, SPAG5	499	190	13588	0.429955	1	1	100
GOTERM_BP_FAT	GO:0000087~M phase of mitotic cell cycle	3	0.447094	0.994244	NDE1, TIMELESS, SPAG5	499	194	13588	0.42109	1	1	100
GOTERM_BP_FAT	GO:0000278~mitotic cell cycle	4	0.596125	0.994422	NDE1, TIMELESS, SPAG5, SLFN1	499	244	13588	0.446401	1	1	100
GOTERM_BP_FAT	GO:0048285~organelle fission	3	0.447094	0.994792	NDE1, TIMELESS, SPAG5	499	197	13588	0.414677	1	1	100
GOTERM_BP_FAT	GO:0007049~cell cycle	12	1.78838	0.997929	TXNIP, CDKN1A, NDE1, UHRF1, IKZF1, TIMELESS, SPAG5, MAP3K8, PIM1, ANXA1, FANCA, SLFN1	499	611	13588	0.534804	1	1	100
GOTERM_BP_FAT	GO:0022403~cell cycle phase	5	0.745156	0.99819	NDE1, TIMELESS, SPAG5, FANCA, SLFN1	499	328	13588	0.415098	1	1	100
GOTERM_BP_FAT	GO:0000279~M phase	4	0.596125	0.998339	NDE1, TIMELESS, SPAG5, FANCA	499	283	13588	0.384883	1	1	100
GOTERM_BP_FAT	GO:0022402~cell cycle process	6	0.894188	0.998972	CDKN1A, NDE1, TIMELESS, SPAG5, FANCA, SLFN1	499	393	13588	0.415732	1	1	100
GOTERM_BP_FAT	GO:0051301~cell division	3	0.447094	0.999704	NDE1, TIMELESS, SPAG5	499	281	13588	0.290717	1	1	100
Annotation Cluster 84	Enrichment Score: 5.88668144492482E-4
Category	Term	Count	%	PValue	Genes	List Total	Pop Hits	Pop Total	Fold Enrichment	Bonferroni	Benjamini	FDR
GOTERM_BP_FAT	GO:0000904~cell morphogenesis involved in differentiation	3	0.447094	0.996849	GLI2, VASP, TGFB1	499	212	13588	0.385337	1	1	100
GOTERM_BP_FAT	GO:0000902~cell morphogenesis	4	0.596125	0.999275	SHROOM1, GLI2, VASP, TGFB1	499	309	13588	0.352498	1	1	100
GOTERM_BP_FAT	GO:0032989~cellular component morphogenesis	4	0.596125	0.999815	SHROOM1, GLI2, VASP, TGFB1	499	351	13588	0.310319	1	1	100

## Sheet: LPS_vs_Sham_DOWN_GO_BP
Annotation Cluster 1	Enrichment Score: 2.01575124915644
Category	Term	Count	%	PValue	Genes	List Total	Pop Hits	Pop Total	Fold Enrichment	Bonferroni	Benjamini	FDR
GOTERM_BP_FAT	GO:0006811~ion transport	18	9.78261	6.2438e-05	CAV1, KCNK15, GABRB2, CACNG6, SLC22A8, CNGB1, SLCO2B1, SLCO1A4, SLC26A7, PLN, SLCO1C1, KCNE2, SLC22A6, CHRNA7, PLLP, KCTD16, SLC40A1, NIPAL4	112	712	13588	3.06711	0.0603545	0.0603545	0.0985669
GOTERM_BP_FAT	GO:0015674~di-, tri-valent inorganic cation transport	6	3.26087	0.01028	CAV1, PLN, CACNG6, CHRNA7, SLC40A1, NIPAL4	112	161	13588	4.5213	0.999966	0.820403	15.0579
GOTERM_BP_FAT	GO:0030001~metal ion transport	9	4.8913	0.0283022	KCNK15, CAV1, PLN, CACNG6, KCNE2, CHRNA7, KCTD16, SLC40A1, NIPAL4	112	442	13588	2.47035	1	0.870567	36.4563
GOTERM_BP_FAT	GO:0006812~cation transport	9	4.8913	0.0599421	KCNK15, CAV1, PLN, CACNG6, KCNE2, CHRNA7, KCTD16, SLC40A1, NIPAL4	112	515	13588	2.12018	1	0.90655	62.3285
GOTERM_BP_FAT	GO:0006816~calcium ion transport	4	2.17391	0.0766033	CAV1, PLN, CACNG6, CHRNA7	112	121	13588	4.01063	1	0.896709	71.5976
Annotation Cluster 2	Enrichment Score: 1.7076846414205233
Category	Term	Count	%	PValue	Genes	List Total	Pop Hits	Pop Total	Fold Enrichment	Bonferroni	Benjamini	FDR
GOTERM_BP_FAT	GO:0048762~mesenchymal cell differentiation	4	2.17391	0.00744096	FGFR2, EDN3, GBX2, CYP26A1	112	49	13588	9.90379	0.999416	0.844575	11.1268
GOTERM_BP_FAT	GO:0060485~mesenchyme development	4	2.17391	0.00786948	FGFR2, EDN3, GBX2, CYP26A1	112	50	13588	9.70571	0.999621	0.793072	11.7309
GOTERM_BP_FAT	GO:0014033~neural crest cell differentiation	3	1.63043	0.0296174	EDN3, GBX2, CYP26A1	112	33	13588	11.0292	1	0.846402	37.8012
GOTERM_BP_FAT	GO:0014032~neural crest cell development	3	1.63043	0.0296174	EDN3, GBX2, CYP26A1	112	33	13588	11.0292	1	0.846402	37.8012
GOTERM_BP_FAT	GO:0014031~mesenchymal cell development	3	1.63043	0.0563518	EDN3, GBX2, CYP26A1	112	47	13588	7.74392	1	0.910139	59.9908
Annotation Cluster 3	Enrichment Score: 1.398138637861744
Category	Term	Count	%	PValue	Genes	List Total	Pop Hits	Pop Total	Fold Enrichment	Bonferroni	Benjamini	FDR
GOTERM_BP_FAT	GO:0042310~vasoconstriction	3	1.63043	0.00486396	EDN3, CAV1, ACTA2	112	13	13588	27.9973	0.992259	0.802181	7.41169
GOTERM_BP_FAT	GO:0050880~regulation of blood vessel size	3	1.63043	0.0584963	EDN3, CAV1, ACTA2	112	48	13588	7.58259	1	0.909631	61.403
GOTERM_BP_FAT	GO:0035150~regulation of tube size	3	1.63043	0.0584963	EDN3, CAV1, ACTA2	112	48	13588	7.58259	1	0.909631	61.403
GOTERM_BP_FAT	GO:0008015~blood circulation	4	2.17391	0.0624802	EDN3, CAV1, ACTA2, CHRNA7	112	111	13588	4.37194	1	0.899468	63.9032
GOTERM_BP_FAT	GO:0003013~circulatory system process	4	2.17391	0.0624802	EDN3, CAV1, ACTA2, CHRNA7	112	111	13588	4.37194	1	0.899468	63.9032
GOTERM_BP_FAT	GO:0003018~vascular process in circulatory system	3	1.63043	0.0628689	EDN3, CAV1, ACTA2	112	50	13588	7.27929	1	0.892721	64.1388
Annotation Cluster 4	Enrichment Score: 1.2779371273311193
Category	Term	Count	%	PValue	Genes	List Total	Pop Hits	Pop Total	Fold Enrichment	Bonferroni	Benjamini	FDR
GOTERM_BP_FAT	GO:0001568~blood vessel development	7	3.80435	0.0149378	BMP4, FGFR2, CAV1, COL3A1, GBX2, SOX17, CXCL12	112	244	13588	3.48053	1	0.88277	21.1563
GOTERM_BP_FAT	GO:0008283~cell proliferation	7	3.80435	0.0157765	BMP4, FGFR2, IRF6, GBX2, FABP7, IL7R, CXCL12	112	247	13588	3.43826	1	0.862182	22.2098
GOTERM_BP_FAT	GO:0001944~vasculature development	7	3.80435	0.0166473	BMP4, FGFR2, CAV1, COL3A1, GBX2, SOX17, CXCL12	112	250	13588	3.397	1	0.844277	23.2898
GOTERM_BP_FAT	GO:0048514~blood vessel morphogenesis	6	3.26087	0.0231346	BMP4, FGFR2, CAV1, GBX2, SOX17, CXCL12	112	198	13588	3.67641	1	0.856967	30.9039
GOTERM_BP_FAT	GO:0060443~mammary gland morphogenesis	3	1.63043	0.0296174	BMP4, FGFR2, CAV1	112	33	13588	11.0292	1	0.846402	37.8012
GOTERM_BP_FAT	GO:0030879~mammary gland development	4	2.17391	0.0332987	BMP4, FGFR2, CAV1, IRF6	112	86	13588	5.64286	1	0.862774	41.4251
GOTERM_BP_FAT	GO:0051240~positive regulation of multicellular organismal process	4	2.17391	0.148604	BMP4, FGFR2, CAV1, CHRNA7	112	163	13588	2.97721	1	0.969403	92.1201
GOTERM_BP_FAT	GO:0022612~gland morphogenesis	3	1.63043	0.150224	BMP4, FGFR2, CAV1	112	84	13588	4.33291	1	0.968352	92.3536
GOTERM_BP_FAT	GO:0048732~gland development	4	2.17391	0.217862	BMP4, FGFR2, CAV1, IRF6	112	197	13588	2.46338	1	0.963507	97.9367
GOTERM_BP_FAT	GO:0060429~epithelium development	4	2.17391	0.381768	BMP4, FGFR2, IRF6, CAR2	112	271	13588	1.79072	1	0.985089	99.9497
Annotation Cluster 5	Enrichment Score: 1.2427725557588278
Category	Term	Count	%	PValue	Genes	List Total	Pop Hits	Pop Total	Fold Enrichment	Bonferroni	Benjamini	FDR
GOTERM_BP_FAT	GO:0001763~morphogenesis of a branching structure	5	2.71739	0.0192196	BMP4, FGFR2, GBX2, CXCL12, MYCN	112	125	13588	4.85286	1	0.855554	26.3983
GOTERM_BP_FAT	GO:0035239~tube morphogenesis	5	2.71739	0.0514977	BMP4, FGFR2, GBX2, CXCL12, MYCN	112	171	13588	3.54741	1	0.918741	56.6137
GOTERM_BP_FAT	GO:0030324~lung development	4	2.17391	0.0624802	BMP4, FGFR2, NKX2-9, MYCN	112	111	13588	4.37194	1	0.899468	63.9032
GOTERM_BP_FAT	GO:0030323~respiratory tube development	4	2.17391	0.0651985	BMP4, FGFR2, NKX2-9, MYCN	112	113	13588	4.29456	1	0.893608	65.5212
GOTERM_BP_FAT	GO:0035295~tube development	6	3.26087	0.0652118	BMP4, FGFR2, NKX2-9, GBX2, CXCL12, MYCN	112	264	13588	2.75731	1	0.885686	65.5289
GOTERM_BP_FAT	GO:0060541~respiratory system development	4	2.17391	0.0810927	BMP4, FGFR2, NKX2-9, MYCN	112	124	13588	3.91359	1	0.903876	73.7018
GOTERM_BP_FAT	GO:0050678~regulation of epithelial cell proliferation	3	1.63043	0.0937072	BMP4, FGFR2, NKX2-9	112	63	13588	5.77721	1	0.913917	78.8596
Annotation Cluster 6	Enrichment Score: 0.9613034894700848
Category	Term	Count	%	PValue	Genes	List Total	Pop Hits	Pop Total	Fold Enrichment	Bonferroni	Benjamini	FDR
GOTERM_BP_FAT	GO:0001568~blood vessel development	7	3.80435	0.0149378	BMP4, FGFR2, CAV1, COL3A1, GBX2, SOX17, CXCL12	112	244	13588	3.48053	1	0.88277	21.1563
GOTERM_BP_FAT	GO:0008283~cell proliferation	7	3.80435	0.0157765	BMP4, FGFR2, IRF6, GBX2, FABP7, IL7R, CXCL12	112	247	13588	3.43826	1	0.862182	22.2098
GOTERM_BP_FAT	GO:0001944~vasculature development	7	3.80435	0.0166473	BMP4, FGFR2, CAV1, COL3A1, GBX2, SOX17, CXCL12	112	250	13588	3.397	1	0.844277	23.2898
GOTERM_BP_FAT	GO:0001763~morphogenesis of a branching structure	5	2.71739	0.0192196	BMP4, FGFR2, GBX2, CXCL12, MYCN	112	125	13588	4.85286	1	0.855554	26.3983
GOTERM_BP_FAT	GO:0048514~blood vessel morphogenesis	6	3.26087	0.0231346	BMP4, FGFR2, CAV1, GBX2, SOX17, CXCL12	112	198	13588	3.67641	1	0.856967	30.9039
GOTERM_BP_FAT	GO:0001525~angiogenesis	5	2.71739	0.0235211	BMP4, FGFR2, GBX2, SOX17, CXCL12	112	133	13588	4.56096	1	0.838854	31.3345
GOTERM_BP_FAT	GO:0007389~pattern specification process	7	3.80435	0.0289283	BMP4, FGFR2, SOSTDC1, CYP26B1, GBX2, CYP26A1, CXCL12	112	284	13588	2.99032	1	0.857886	37.0999
GOTERM_BP_FAT	GO:0048754~branching morphogenesis of a tube	4	2.17391	0.0405453	BMP4, GBX2, CXCL12, MYCN	112	93	13588	5.21813	1	0.886038	47.9883
GOTERM_BP_FAT	GO:0035239~tube morphogenesis	5	2.71739	0.0514977	BMP4, FGFR2, GBX2, CXCL12, MYCN	112	171	13588	3.54741	1	0.918741	56.6137
GOTERM_BP_FAT	GO:0035295~tube development	6	3.26087	0.0652118	BMP4, FGFR2, NKX2-9, GBX2, CXCL12, MYCN	112	264	13588	2.75731	1	0.885686	65.5289
GOTERM_BP_FAT	GO:0035108~limb morphogenesis	4	2.17391	0.0679707	BMP4, FGFR2, MSX1, CYP26B1	112	115	13588	4.21988	1	0.888432	67.1011
GOTERM_BP_FAT	GO:0035107~appendage morphogenesis	4	2.17391	0.0679707	BMP4, FGFR2, MSX1, CYP26B1	112	115	13588	4.21988	1	0.888432	67.1011
GOTERM_BP_FAT	GO:0060173~limb development	4	2.17391	0.0736738	BMP4, FGFR2, MSX1, CYP26B1	112	119	13588	4.07803	1	0.893977	70.1406
GOTERM_BP_FAT	GO:0048736~appendage development	4	2.17391	0.0736738	BMP4, FGFR2, MSX1, CYP26B1	112	119	13588	4.07803	1	0.893977	70.1406
GOTERM_BP_FAT	GO:0045165~cell fate commitment	4	2.17391	0.119024	BMP4, FGFR2, HES5, CYP26B1	112	147	13588	3.30126	1	0.947041	86.486
GOTERM_BP_FAT	GO:0007423~sensory organ development	5	2.71739	0.158894	BMP4, FGFR2, HES5, CRYAB, GBX2	112	257	13588	2.36034	1	0.970423	93.4969
GOTERM_BP_FAT	GO:0048610~reproductive cellular process	4	2.17391	0.168186	BMP4, FGFR2, TRIM36, CXCL12	112	173	13588	2.80512	1	0.970714	94.5434
GOTERM_BP_FAT	GO:0030326~embryonic limb morphogenesis	3	1.63043	0.187886	BMP4, MSX1, CYP26B1	112	97	13588	3.75221	1	0.964797	96.263
GOTERM_BP_FAT	GO:0035113~embryonic appendage morphogenesis	3	1.63043	0.187886	BMP4, MSX1, CYP26B1	112	97	13588	3.75221	1	0.964797	96.263
GOTERM_BP_FAT	GO:0030182~neuron differentiation	6	3.26087	0.227445	BMP4, EDN3, HES5, NKX2-9, GBX2, CXCL12	112	399	13588	1.82438	1	0.963059	98.3018
GOTERM_BP_FAT	GO:0003002~regionalization	4	2.17391	0.254704	BMP4, CYP26B1, GBX2, CYP26A1	112	214	13588	2.26769	1	0.968195	99.0371
GOTERM_BP_FAT	GO:0048568~embryonic organ development	4	2.17391	0.314718	BMP4, FGFR2, GBX2, PCDH12	112	241	13588	2.01363	1	0.975129	99.7443
GOTERM_BP_FAT	GO:0048598~embryonic morphogenesis	5	2.71739	0.33738	BMP4, FGFR2, MSX1, CYP26B1, GBX2	112	359	13588	1.68971	1	0.978393	99.8496
GOTERM_BP_FAT	GO:0048562~embryonic organ morphogenesis	3	1.63043	0.379657	BMP4, FGFR2, GBX2	112	161	13588	2.26065	1	0.985196	99.9469
GOTERM_BP_FAT	GO:0007167~enzyme linked receptor protein signaling pathway	4	2.17391	0.386205	BMP4, FGFR2, MSX1, TEK	112	273	13588	1.7776	1	0.98438	99.9551
GOTERM_BP_FAT	GO:0001501~skeletal system development	4	2.17391	0.412665	BMP4, FGFR2, MSX1, CYTL1	112	285	13588	1.70276	1	0.987535	99.9776
GOTERM_BP_FAT	GO:0043009~chordate embryonic development	5	2.71739	0.452048	BMP4, FGFR2, MSX1, GBX2, PCDH12	112	421	13588	1.44087	1	0.989728	99.9925
GOTERM_BP_FAT	GO:0009792~embryonic development ending in birth or egg hatching	5	2.71739	0.459291	BMP4, FGFR2, MSX1, GBX2, PCDH12	112	425	13588	1.42731	1	0.990041	99.9939
GOTERM_BP_FAT	GO:0003006~reproductive developmental process	3	1.63043	0.638732	BMP4, FGFR2, CXCL12	112	264	13588	1.37865	1	0.998686	100
GOTERM_BP_FAT	GO:0001701~in utero embryonic development	3	1.63043	0.644872	FGFR2, MSX1, PCDH12	112	267	13588	1.36316	1	0.998718	100
Annotation Cluster 7	Enrichment Score: 0.9205052411486241
Category	Term	Count	%	PValue	Genes	List Total	Pop Hits	Pop Total	Fold Enrichment	Bonferroni	Benjamini	FDR
GOTERM_BP_FAT	GO:0008283~cell proliferation	7	3.80435	0.0157765	BMP4, FGFR2, IRF6, GBX2, FABP7, IL7R, CXCL12	112	247	13588	3.43826	1	0.862182	22.2098
GOTERM_BP_FAT	GO:0040007~growth	4	2.17391	0.209364	BMP4, FGFR2, NINJ2, IL7R	112	193	13588	2.51443	1	0.963071	97.5527
GOTERM_BP_FAT	GO:0051094~positive regulation of developmental process	3	1.63043	0.524292	BMP4, FGFR2, IL7R	112	214	13588	1.70077	1	0.995514	99.9992
Annotation Cluster 8	Enrichment Score: 0.7739503599996997
Category	Term	Count	%	PValue	Genes	List Total	Pop Hits	Pop Total	Fold Enrichment	Bonferroni	Benjamini	FDR
GOTERM_BP_FAT	GO:0007517~muscle organ development	5	2.71739	0.0561213	CAV1, MSX1, CRYAB, PLN, MYH11	112	176	13588	3.44663	1	0.918216	59.8362
GOTERM_BP_FAT	GO:0014706~striated muscle tissue development	3	1.63043	0.278121	CAV1, PLN, MYH11	112	127	13588	2.86586	1	0.970746	99.4184
GOTERM_BP_FAT	GO:0060537~muscle tissue development	3	1.63043	0.305342	CAV1, PLN, MYH11	112	136	13588	2.67621	1	0.976359	99.6831
Annotation Cluster 9	Enrichment Score: 0.7598372603296432
Category	Term	Count	%	PValue	Genes	List Total	Pop Hits	Pop Total	Fold Enrichment	Bonferroni	Benjamini	FDR
GOTERM_BP_FAT	GO:0001667~ameboidal cell migration	3	1.63043	0.052149	EDN3, GBX2, CXCL12	112	45	13588	8.0881	1	0.911712	57.0819
GOTERM_BP_FAT	GO:0006928~cell motion	6	3.26087	0.181359	EDN3, GBX2, CHRNA7, CXCL12, PLAU, ALOX12	112	367	13588	1.98346	1	0.966004	95.7594
GOTERM_BP_FAT	GO:0048870~cell motility	5	2.71739	0.20265	EDN3, GBX2, CHRNA7, CXCL12, PLAU	112	284	13588	2.13594	1	0.968994	97.2031
GOTERM_BP_FAT	GO:0051674~localization of cell	5	2.71739	0.20265	EDN3, GBX2, CHRNA7, CXCL12, PLAU	112	284	13588	2.13594	1	0.968994	97.2031
GOTERM_BP_FAT	GO:0030182~neuron differentiation	6	3.26087	0.227445	BMP4, EDN3, HES5, NKX2-9, GBX2, CXCL12	112	399	13588	1.82438	1	0.963059	98.3018
GOTERM_BP_FAT	GO:0016477~cell migration	4	2.17391	0.31248	EDN3, GBX2, CXCL12, PLAU	112	240	13588	2.02202	1	0.975237	99.7308
Annotation Cluster 10	Enrichment Score: 0.7569482954418935
Category	Term	Count	%	PValue	Genes	List Total	Pop Hits	Pop Total	Fold Enrichment	Bonferroni	Benjamini	FDR
GOTERM_BP_FAT	GO:0007423~sensory organ development	5	2.71739	0.158894	BMP4, FGFR2, HES5, CRYAB, GBX2	112	257	13588	2.36034	1	0.970423	93.4969
GOTERM_BP_FAT	GO:0048839~inner ear development	3	1.63043	0.16165	FGFR2, HES5, GBX2	112	88	13588	4.13596	1	0.970277	93.8255
GOTERM_BP_FAT	GO:0043583~ear development	3	1.63043	0.208676	FGFR2, HES5, GBX2	112	104	13588	3.49966	1	0.966014	97.5189
Annotation Cluster 11	Enrichment Score: 0.7238967600977201
Category	Term	Count	%	PValue	Genes	List Total	Pop Hits	Pop Total	Fold Enrichment	Bonferroni	Benjamini	FDR
GOTERM_BP_FAT	GO:0048514~blood vessel morphogenesis	6	3.26087	0.0231346	BMP4, FGFR2, CAV1, GBX2, SOX17, CXCL12	112	198	13588	3.67641	1	0.856967	30.9039
GOTERM_BP_FAT	GO:0007389~pattern specification process	7	3.80435	0.0289283	BMP4, FGFR2, SOSTDC1, CYP26B1, GBX2, CYP26A1, CXCL12	112	284	13588	2.99032	1	0.857886	37.0999
GOTERM_BP_FAT	GO:0051240~positive regulation of multicellular organismal process	4	2.17391	0.148604	BMP4, FGFR2, CAV1, CHRNA7	112	163	13588	2.97721	1	0.969403	92.1201
GOTERM_BP_FAT	GO:0048609~reproductive process in a multicellular organism	5	2.71739	0.43015	BMP4, CAV1, CYP26B1, CHRNA7, CXCL12	112	409	13588	1.48315	1	0.988321	99.9861
GOTERM_BP_FAT	GO:0032504~multicellular organism reproduction	5	2.71739	0.43015	BMP4, CAV1, CYP26B1, CHRNA7, CXCL12	112	409	13588	1.48315	1	0.988321	99.9861
GOTERM_BP_FAT	GO:0019953~sexual reproduction	4	2.17391	0.614773	BMP4, TRIM36, CYP26B1, CXCL12	112	386	13588	1.25722	1	0.998161	100
GOTERM_BP_FAT	GO:0007276~gamete generation	3	1.63043	0.757099	BMP4, CYP26B1, CXCL12	112	331	13588	1.09959	1	0.999739	100
Annotation Cluster 12	Enrichment Score: 0.7034029251782324
Category	Term	Count	%	PValue	Genes	List Total	Pop Hits	Pop Total	Fold Enrichment	Bonferroni	Benjamini	FDR
GOTERM_BP_FAT	GO:0015674~di-, tri-valent inorganic cation transport	6	3.26087	0.01028	CAV1, PLN, CACNG6, CHRNA7, SLC40A1, NIPAL4	112	161	13588	4.5213	0.999966	0.820403	15.0579
GOTERM_BP_FAT	GO:0006816~calcium ion transport	4	2.17391	0.0766033	CAV1, PLN, CACNG6, CHRNA7	112	121	13588	4.01063	1	0.896709	71.5976
GOTERM_BP_FAT	GO:0006873~cellular ion homeostasis	5	2.71739	0.165138	CAV1, CCKBR, UGT8A, PLN, CHRNA7	112	261	13588	2.32417	1	0.970648	94.2189
GOTERM_BP_FAT	GO:0006874~cellular calcium ion homeostasis	3	1.63043	0.170322	CAV1, CCKBR, PLN	112	91	13588	3.99961	1	0.96817	94.7605
GOTERM_BP_FAT	GO:0055082~cellular chemical homeostasis	5	2.71739	0.176276	CAV1, CCKBR, UGT8A, PLN, CHRNA7	112	268	13588	2.26346	1	0.964329	95.3239
GOTERM_BP_FAT	GO:0055074~calcium ion homeostasis	3	1.63043	0.182001	CAV1, CCKBR, PLN	112	95	13588	3.8312	1	0.964499	95.8116
GOTERM_BP_FAT	GO:0006875~cellular metal ion homeostasis	3	1.63043	0.196762	CAV1, CCKBR, PLN	112	100	13588	3.63964	1	0.967065	96.8585
GOTERM_BP_FAT	GO:0055065~metal ion homeostasis	3	1.63043	0.214661	CAV1, CCKBR, PLN	112	106	13588	3.43363	1	0.964777	97.7993
GOTERM_BP_FAT	GO:0050801~ion homeostasis	5	2.71739	0.217981	CAV1, CCKBR, UGT8A, PLN, CHRNA7	112	293	13588	2.07033	1	0.961937	97.9417
GOTERM_BP_FAT	GO:0044057~regulation of system process	4	2.17391	0.226432	EDN3, CAV1, PLN, CHRNA7	112	201	13588	2.41436	1	0.965543	98.2663
GOTERM_BP_FAT	GO:0042391~regulation of membrane potential	3	1.63043	0.253876	CAV1, UGT8A, CHRNA7	112	119	13588	3.05852	1	0.969069	99.02
GOTERM_BP_FAT	GO:0030005~cellular di-, tri-valent inorganic cation homeostasis	3	1.63043	0.299304	CAV1, CCKBR, PLN	112	134	13588	2.71615	1	0.976074	99.6366
GOTERM_BP_FAT	GO:0019725~cellular homeostasis	5	2.71739	0.30771	CAV1, CCKBR, UGT8A, PLN, CHRNA7	112	343	13588	1.76853	1	0.976277	99.6997
GOTERM_BP_FAT	GO:0055066~di-, tri-valent inorganic cation homeostasis	3	1.63043	0.335367	CAV1, CCKBR, PLN	112	146	13588	2.49291	1	0.978558	99.8423
GOTERM_BP_FAT	GO:0042592~homeostatic process	7	3.80435	0.342755	BMP4, CAV1, CCKBR, UGT8A, PLN, CHRNA7, IL7R	112	584	13588	1.4542	1	0.979234	99.8678
GOTERM_BP_FAT	GO:0048878~chemical homeostasis	5	2.71739	0.348549	CAV1, CCKBR, UGT8A, PLN, CHRNA7	112	365	13588	1.66194	1	0.980157	99.885
GOTERM_BP_FAT	GO:0030003~cellular cation homeostasis	3	1.63043	0.35321	CAV1, CCKBR, PLN	112	152	13588	2.3945	1	0.980732	99.8974
GOTERM_BP_FAT	GO:0055080~cation homeostasis	3	1.63043	0.445031	CAV1, CCKBR, PLN	112	184	13588	1.97807	1	0.989812	99.9909
Annotation Cluster 13	Enrichment Score: 0.6916609920444073
Category	Term	Count	%	PValue	Genes	List Total	Pop Hits	Pop Total	Fold Enrichment	Bonferroni	Benjamini	FDR
GOTERM_BP_FAT	GO:0042110~T cell activation	4	2.17391	0.0693768	EGR1, CHRNA7, IL7R, CXCL12	112	116	13588	4.1835	1	0.886082	67.8763
GOTERM_BP_FAT	GO:0001775~cell activation	5	2.71739	0.142202	P2RY12, EGR1, CHRNA7, IL7R, CXCL12	112	246	13588	2.46588	1	0.966572	91.1303
GOTERM_BP_FAT	GO:0046649~lymphocyte activation	4	2.17391	0.205143	EGR1, CHRNA7, IL7R, CXCL12	112	191	13588	2.54076	1	0.967172	97.3381
GOTERM_BP_FAT	GO:0045321~leukocyte activation	4	2.17391	0.265717	EGR1, CHRNA7, IL7R, CXCL12	112	219	13588	2.21592	1	0.967336	99.2388
GOTERM_BP_FAT	GO:0007610~behavior	4	2.17391	0.647292	EGR1, CMTM8, CHRNA7, CXCL12	112	405	13588	1.19824	1	0.998719	100
Annotation Cluster 14	Enrichment Score: 0.6893951160628237
Category	Term	Count	%	PValue	Genes	List Total	Pop Hits	Pop Total	Fold Enrichment	Bonferroni	Benjamini	FDR
GOTERM_BP_FAT	GO:0030334~regulation of cell migration	3	1.63043	0.17323	EDN3, TEK, CXCL12	112	92	13588	3.95613	1	0.968201	95.0431
GOTERM_BP_FAT	GO:0051270~regulation of cell motion	3	1.63043	0.217661	EDN3, TEK, CXCL12	112	107	13588	3.40154	1	0.965002	97.9283
GOTERM_BP_FAT	GO:0040012~regulation of locomotion	3	1.63043	0.22668	EDN3, TEK, CXCL12	112	110	13588	3.30877	1	0.964151	98.275
Annotation Cluster 15	Enrichment Score: 0.437268408628693
Category	Term	Count	%	PValue	Genes	List Total	Pop Hits	Pop Total	Fold Enrichment	Bonferroni	Benjamini	FDR
GOTERM_BP_FAT	GO:0035295~tube development	6	3.26087	0.0652118	BMP4, FGFR2, NKX2-9, GBX2, CXCL12, MYCN	112	264	13588	2.75731	1	0.885686	65.5289
GOTERM_BP_FAT	GO:0030182~neuron differentiation	6	3.26087	0.227445	BMP4, EDN3, HES5, NKX2-9, GBX2, CXCL12	112	399	13588	1.82438	1	0.963059	98.3018
GOTERM_BP_FAT	GO:0030030~cell projection organization	5	2.71739	0.263867	NKX2-9, GBX2, ITGB4, LPAR1, CXCL12	112	319	13588	1.90159	1	0.968906	99.208
GOTERM_BP_FAT	GO:0032989~cellular component morphogenesis	5	2.71739	0.322517	NKX2-9, MYH11, GBX2, IL7R, CXCL12	112	351	13588	1.72823	1	0.976072	99.7866
GOTERM_BP_FAT	GO:0007409~axonogenesis	3	1.63043	0.385476	NKX2-9, GBX2, CXCL12	112	163	13588	2.23291	1	0.984776	99.9543
GOTERM_BP_FAT	GO:0048812~neuron projection morphogenesis	3	1.63043	0.422697	NKX2-9, GBX2, CXCL12	112	176	13588	2.06798	1	0.987933	99.983
GOTERM_BP_FAT	GO:0048667~cell morphogenesis involved in neuron differentiation	3	1.63043	0.439491	NKX2-9, GBX2, CXCL12	112	182	13588	1.9998	1	0.989376	99.9893
GOTERM_BP_FAT	GO:0000902~cell morphogenesis	4	2.17391	0.464451	NKX2-9, GBX2, IL7R, CXCL12	112	309	13588	1.5705	1	0.990402	99.9948
GOTERM_BP_FAT	GO:0048858~cell projection morphogenesis	3	1.63043	0.493485	NKX2-9, GBX2, CXCL12	112	202	13588	1.8018	1	0.993418	99.9978
GOTERM_BP_FAT	GO:0000904~cell morphogenesis involved in differentiation	3	1.63043	0.519244	NKX2-9, GBX2, CXCL12	112	212	13588	1.71681	1	0.995342	99.9991
GOTERM_BP_FAT	GO:0032990~cell part morphogenesis	3	1.63043	0.519244	NKX2-9, GBX2, CXCL12	112	212	13588	1.71681	1	0.995342	99.9991
GOTERM_BP_FAT	GO:0031175~neuron projection development	3	1.63043	0.534282	NKX2-9, GBX2, CXCL12	112	218	13588	1.66956	1	0.995998	99.9994
GOTERM_BP_FAT	GO:0048666~neuron development	3	1.63043	0.692892	NKX2-9, GBX2, CXCL12	112	292	13588	1.24645	1	0.999332	100
Annotation Cluster 16	Enrichment Score: 0.3708242344842793
Category	Term	Count	%	PValue	Genes	List Total	Pop Hits	Pop Total	Fold Enrichment	Bonferroni	Benjamini	FDR
GOTERM_BP_FAT	GO:0051216~cartilage development	3	1.63043	0.133422	BMP4, MSX1, CYTL1	112	78	13588	4.66621	1	0.961026	89.5827
GOTERM_BP_FAT	GO:0045944~positive regulation of transcription from RNA polymerase II promoter	6	3.26087	0.169095	BMP4, EGR1, MSX1, HES5, CYTL1, NPAS4	112	358	13588	2.03332	1	0.969334	94.6368
GOTERM_BP_FAT	GO:0045941~positive regulation of transcription	7	3.80435	0.192667	BMP4, EGR1, MSX1, HES5, IRF6, CYTL1, NPAS4	112	475	13588	1.78789	1	0.966188	96.5957
GOTERM_BP_FAT	GO:0010628~positive regulation of gene expression	7	3.80435	0.209148	BMP4, EGR1, MSX1, HES5, IRF6, CYTL1, NPAS4	112	488	13588	1.74027	1	0.964634	97.5422
GOTERM_BP_FAT	GO:0010033~response to organic substance	7	3.80435	0.231431	EGR1, LY6G6F, CAV1, MSX1, SLC22A8, SLC22A6, CHRNA7	112	505	13588	1.68168	1	0.963918	98.435
GOTERM_BP_FAT	GO:0045935~positive regulation of nucleobase, nucleoside, nucleotide and nucleic acid metabolic process	7	3.80435	0.238129	BMP4, EGR1, MSX1, HES5, IRF6, CYTL1, NPAS4	112	510	13588	1.6652	1	0.966275	98.6371
GOTERM_BP_FAT	GO:0045893~positive regulation of transcription, DNA-dependent	6	3.26087	0.253244	BMP4, EGR1, MSX1, HES5, CYTL1, NPAS4	112	416	13588	1.74983	1	0.970035	99.0068
GOTERM_BP_FAT	GO:0051254~positive regulation of RNA metabolic process	6	3.26087	0.257874	BMP4, EGR1, MSX1, HES5, CYTL1, NPAS4	112	419	13588	1.7373	1	0.96849	99.0997
GOTERM_BP_FAT	GO:0051173~positive regulation of nitrogen compound metabolic process	7	3.80435	0.259952	BMP4, EGR1, MSX1, HES5, IRF6, CYTL1, NPAS4	112	526	13588	1.61454	1	0.96825	99.1387
GOTERM_BP_FAT	GO:0010557~positive regulation of macromolecule biosynthetic process	7	3.80435	0.265493	BMP4, EGR1, MSX1, HES5, IRF6, CYTL1, NPAS4	112	530	13588	1.60236	1	0.968461	99.2351
GOTERM_BP_FAT	GO:0031328~positive regulation of cellular biosynthetic process	7	3.80435	0.296488	BMP4, EGR1, MSX1, HES5, IRF6, CYTL1, NPAS4	112	552	13588	1.5385	1	0.976006	99.6129
GOTERM_BP_FAT	GO:0009891~positive regulation of biosynthetic process	7	3.80435	0.303639	BMP4, EGR1, MSX1, HES5, IRF6, CYTL1, NPAS4	112	557	13588	1.52469	1	0.976678	99.6706
GOTERM_BP_FAT	GO:0001501~skeletal system development	4	2.17391	0.412665	BMP4, FGFR2, MSX1, CYTL1	112	285	13588	1.70276	1	0.987535	99.9776
GOTERM_BP_FAT	GO:0010604~positive regulation of macromolecule metabolic process	7	3.80435	0.414789	BMP4, EGR1, MSX1, HES5, IRF6, CYTL1, NPAS4	112	633	13588	1.34163	1	0.987001	99.9789
GOTERM_BP_FAT	GO:0006355~regulation of transcription, DNA-dependent	13	7.06522	0.541493	BMP4, EGR1, GM14443, NKX2-9, CYTL1, NPAS4, MYCN, MSX1, HES5, IRF6, GBX2, NFE2L3, ZFP72	112	1465	13588	1.07657	1	0.996125	99.9996
GOTERM_BP_FAT	GO:0051252~regulation of RNA metabolic process	13	7.06522	0.564206	BMP4, EGR1, GM14443, NKX2-9, CYTL1, NPAS4, MYCN, MSX1, HES5, IRF6, GBX2, NFE2L3, ZFP72	112	1488	13588	1.05993	1	0.996819	99.9998
GOTERM_BP_FAT	GO:0000122~negative regulation of transcription from RNA polymerase II promoter	3	1.63043	0.565759	EGR1, MSX1, HES5	112	231	13588	1.5756	1	0.996771	99.9998
GOTERM_BP_FAT	GO:0006357~regulation of transcription from RNA polymerase II promoter	6	3.26087	0.570025	BMP4, EGR1, MSX1, HES5, CYTL1, NPAS4	112	616	13588	1.1817	1	0.99686	99.9998
GOTERM_BP_FAT	GO:0010605~negative regulation of macromolecule metabolic process	5	2.71739	0.597095	BMP4, EGR1, CAV1, MSX1, HES5	112	506	13588	1.19883	1	0.99781	99.9999
GOTERM_BP_FAT	GO:0051172~negative regulation of nitrogen compound metabolic process	4	2.17391	0.640608	EGR1, CAV1, MSX1, HES5	112	401	13588	1.21019	1	0.998673	100
GOTERM_BP_FAT	GO:0010629~negative regulation of gene expression	4	2.17391	0.655525	BMP4, EGR1, MSX1, HES5	112	410	13588	1.18362	1	0.99885	100
GOTERM_BP_FAT	GO:0031327~negative regulation of cellular biosynthetic process	4	2.17391	0.687091	EGR1, CAV1, MSX1, HES5	112	430	13588	1.12857	1	0.999283	100
GOTERM_BP_FAT	GO:0009890~negative regulation of biosynthetic process	4	2.17391	0.693143	EGR1, CAV1, MSX1, HES5	112	434	13588	1.11817	1	0.999304	100
GOTERM_BP_FAT	GO:0045892~negative regulation of transcription, DNA-dependent	3	1.63043	0.720759	EGR1, MSX1, HES5	112	308	13588	1.1817	1	0.999485	100
GOTERM_BP_FAT	GO:0051253~negative regulation of RNA metabolic process	3	1.63043	0.724091	EGR1, MSX1, HES5	112	310	13588	1.17408	1	0.999498	100
GOTERM_BP_FAT	GO:0045449~regulation of transcription	17	9.23913	0.751114	BMP4, EGR1, GM14443, EGR3, NKX2-9, CYTL1, PADI4, NPAS4, MYCN, MSX1, HES5, IRF6, GBX2, SOX17, NFE2L3, NEUROD6, ZFP72	112	2227	13588	0.926118	1	0.999713	100
GOTERM_BP_FAT	GO:0006350~transcription	13	7.06522	0.797407	EGR1, GM14443, EGR3, MSX1, HES5, IRF6, GBX2, PADI4, SOX17, NPAS4, NEUROD6, NFE2L3, ZFP72	112	1772	13588	0.890056	1	0.999899	100
GOTERM_BP_FAT	GO:0016481~negative regulation of transcription	3	1.63043	0.811883	EGR1, MSX1, HES5	112	372	13588	0.978399	1	0.999922	100
GOTERM_BP_FAT	GO:0045934~negative regulation of nucleobase, nucleoside, nucleotide and nucleic acid metabolic process	3	1.63043	0.839669	EGR1, MSX1, HES5	112	397	13588	0.916787	1	0.999967	100
GOTERM_BP_FAT	GO:0010558~negative regulation of macromolecule biosynthetic process	3	1.63043	0.860107	EGR1, MSX1, HES5	112	418	13588	0.870728	1	0.999984	100
Annotation Cluster 17	Enrichment Score: 0.35722889564269766
Category	Term	Count	%	PValue	Genes	List Total	Pop Hits	Pop Total	Fold Enrichment	Bonferroni	Benjamini	FDR
GOTERM_BP_FAT	GO:0042325~regulation of phosphorylation	4	2.17391	0.423592	BMP4, CAV1, LPAR1, PPP1R14A	112	290	13588	1.6734	1	0.987652	99.9834
GOTERM_BP_FAT	GO:0019220~regulation of phosphate metabolic process	4	2.17391	0.447386	BMP4, CAV1, LPAR1, PPP1R14A	112	301	13588	1.61224	1	0.989785	99.9915
GOTERM_BP_FAT	GO:0051174~regulation of phosphorus metabolic process	4	2.17391	0.447386	BMP4, CAV1, LPAR1, PPP1R14A	112	301	13588	1.61224	1	0.989785	99.9915
Annotation Cluster 18	Enrichment Score: 0.34533610901988365
Category	Term	Count	%	PValue	Genes	List Total	Pop Hits	Pop Total	Fold Enrichment	Bonferroni	Benjamini	FDR
GOTERM_BP_FAT	GO:0060429~epithelium development	4	2.17391	0.381768	BMP4, FGFR2, IRF6, CAR2	112	271	13588	1.79072	1	0.985089	99.9497
GOTERM_BP_FAT	GO:0002009~morphogenesis of an epithelium	3	1.63043	0.414205	BMP4, FGFR2, CAR2	112	173	13588	2.10384	1	0.987353	99.9785
GOTERM_BP_FAT	GO:0048729~tissue morphogenesis	3	1.63043	0.582073	BMP4, FGFR2, CAR2	112	238	13588	1.52926	1	0.997307	99.9999
Annotation Cluster 19	Enrichment Score: 0.18071380060766778
Category	Term	Count	%	PValue	Genes	List Total	Pop Hits	Pop Total	Fold Enrichment	Bonferroni	Benjamini	FDR
GOTERM_BP_FAT	GO:0030097~hemopoiesis	3	1.63043	0.611178	BMP4, EGR1, IL7R	112	251	13588	1.45006	1	0.998124	100
GOTERM_BP_FAT	GO:0048534~hemopoietic or lymphoid organ development	3	1.63043	0.672448	BMP4, EGR1, IL7R	112	281	13588	1.29525	1	0.999126	100
GOTERM_BP_FAT	GO:0002520~immune system development	3	1.63043	0.698284	BMP4, EGR1, IL7R	112	295	13588	1.23378	1	0.999344	100
Annotation Cluster 20	Enrichment Score: 0.16453081009002626
Category	Term	Count	%	PValue	Genes	List Total	Pop Hits	Pop Total	Fold Enrichment	Bonferroni	Benjamini	FDR
GOTERM_BP_FAT	GO:0006468~protein amino acid phosphorylation	6	3.26087	0.604374	GUCY2G, FGFR2, SGK2, TEK, MASTL, LPAR1	112	640	13588	1.13739	1	0.99798	100
GOTERM_BP_FAT	GO:0016310~phosphorylation	6	3.26087	0.704659	GUCY2G, FGFR2, SGK2, TEK, MASTL, LPAR1	112	718	13588	1.01383	1	0.999397	100
GOTERM_BP_FAT	GO:0006793~phosphorus metabolic process	7	3.80435	0.718284	PTPRB, GUCY2G, FGFR2, SGK2, TEK, MASTL, LPAR1	112	866	13588	0.980658	1	0.999481	100
GOTERM_BP_FAT	GO:0006796~phosphate metabolic process	7	3.80435	0.718284	PTPRB, GUCY2G, FGFR2, SGK2, TEK, MASTL, LPAR1	112	866	13588	0.980658	1	0.999481	100

## Sheet: CPD4645_vs_Vehicle_DOWN_GO_BP
Annotation Cluster 1	Enrichment Score: 4.4948243037719635
Category	Term	Count	%	PValue	Genes	List Total	Pop Hits	Pop Total	Fold Enrichment	Bonferroni	Benjamini	FDR
GOTERM_BP_FAT	GO:0007159~leukocyte adhesion	6	1.12994	6.71899e-06	ITGAL, SELP, ITGB2, ITGA4, SELPLG, ITGAM	286	14	13588	20.3616	0.0104602	0.00524383	0.0112205
GOTERM_BP_FAT	GO:0050900~leukocyte migration	8	1.50659	2.79922e-05	SELP, C5AR1, S100A9, CSF3R, ITGB2, SELPLG, ITGAM, FCGR3	286	43	13588	8.83916	0.0428627	0.00727481	0.0467384
GOTERM_BP_FAT	GO:0045123~cellular extravasation	4	0.753296	0.000174255	SELP, ITGB2, SELPLG, ITGAM	286	6	13588	31.6737	0.238704	0.0335171	0.290619
Annotation Cluster 2	Enrichment Score: 3.545961912919482
Category	Term	Count	%	PValue	Genes	List Total	Pop Hits	Pop Total	Fold Enrichment	Bonferroni	Benjamini	FDR
GOTERM_BP_FAT	GO:0006954~inflammatory response	17	3.20151	2.15742e-05	SELP, C3, EPHX2, ITGB2, TLR6, C1QC, TGFB1, SIGIRR, FCGR3, C1QA, SLC11A1, IL23A, CCR5, CXCL13, PYCARD, CD14, FN1	286	225	13588	3.58968	0.0332003	0.00840545	0.036024
GOTERM_BP_FAT	GO:0006952~defense response	25	4.7081	2.54463e-05	SELP, LYZ2, C5AR1, NGP, FGR, C3, EPHX2, MYO1F, ITGB2, TLR6, H2-Q7, C1QC, TGFB1, FCGR3, SIGIRR, C1QA, SLC11A1, IL23A, CCR5, FCGR2B, CXCL13, GRM7, PYCARD, CD14, FN1	286	448	13588	2.65125	0.0390414	0.00793315	0.0424884
GOTERM_BP_FAT	GO:0009611~response to wounding	21	3.9548	4.4772e-05	SELP, GATM, C3, F13A1, EPHX2, ITGB2, TLR6, C1QC, TGFB1, SIGIRR, FCGR3, C1QA, SLC11A1, VWF, IL23A, PROCR, CCR5, CXCL13, PYCARD, CD14, FN1	286	347	13588	2.87527	0.0676712	0.00996003	0.0747457
GOTERM_BP_FAT	GO:0045087~innate immune response	8	1.50659	0.00727368	C1QA, SLC11A1, IL23A, C3, TLR6, C1QC, TGFB1, SIGIRR	286	107	13588	3.55219	0.999989	0.325621	11.478
GOTERM_BP_FAT	GO:0006955~immune response	19	3.57815	0.0104201	C3, CCL9, MYO1F, TLR6, C1QC, H2-Q7, TGFB1, SIGIRR, FCGR3, CCL6, TNFSF8, C1QA, SLC11A1, IL23A, PROCR, FCGR2B, CCR5, CXCL13, CD14	286	471	13588	1.91656	1	0.382544	16.0489
Annotation Cluster 3	Enrichment Score: 3.405301719836566
Category	Term	Count	%	PValue	Genes	List Total	Pop Hits	Pop Total	Fold Enrichment	Bonferroni	Benjamini	FDR
GOTERM_BP_FAT	GO:0007159~leukocyte adhesion	6	1.12994	6.71899e-06	ITGAL, SELP, ITGB2, ITGA4, SELPLG, ITGAM	286	14	13588	20.3616	0.0104602	0.00524383	0.0112205
GOTERM_BP_FAT	GO:0007229~integrin-mediated signaling pathway	8	1.50659	0.00105426	ITGAL, ITGA11, ITGA10, ITGB2, ADAM19, ITGA4, ITGB3, ITGAM	286	76	13588	5.0011	0.808102	0.0925397	1.74619
GOTERM_BP_FAT	GO:0050798~activated T cell proliferation	3	0.564972	0.00858701	ITGAL, ITGB2, ITGAM	286	7	13588	20.3616	0.999999	0.344116	13.4136
Annotation Cluster 4	Enrichment Score: 3.339145009121834
Category	Term	Count	%	PValue	Genes	List Total	Pop Hits	Pop Total	Fold Enrichment	Bonferroni	Benjamini	FDR
GOTERM_BP_FAT	GO:0042330~taxis	13	2.44821	2.94607e-06	DOCK2, C5AR1, S100A8, CXCL13, S100A9, CCL9, CSF3R, CMTM7, CXCR2, ITGB2, ITGAM, FCGR3, CCL6	286	109	13588	5.66639	0.00459999	0.00459999	0.00492
GOTERM_BP_FAT	GO:0006935~chemotaxis	13	2.44821	2.94607e-06	DOCK2, C5AR1, S100A8, CXCL13, S100A9, CCL9, CSF3R, CMTM7, CXCR2, ITGB2, ITGAM, FCGR3, CCL6	286	109	13588	5.66639	0.00459999	0.00459999	0.00492
GOTERM_BP_FAT	GO:0050900~leukocyte migration	8	1.50659	2.79922e-05	SELP, C5AR1, S100A9, CSF3R, ITGB2, SELPLG, ITGAM, FCGR3	286	43	13588	8.83916	0.0428627	0.00727481	0.0467384
GOTERM_BP_FAT	GO:0060326~cell chemotaxis	6	1.12994	0.000216628	C5AR1, S100A9, CSF3R, ITGB2, ITGAM, FCGR3	286	27	13588	10.5579	0.287559	0.0369724	0.361167
GOTERM_BP_FAT	GO:0030595~leukocyte chemotaxis	6	1.12994	0.000216628	C5AR1, S100A9, CSF3R, ITGB2, ITGAM, FCGR3	286	27	13588	10.5579	0.287559	0.0369724	0.361167
GOTERM_BP_FAT	GO:0030593~neutrophil chemotaxis	5	0.94162	0.000363498	C5AR1, CSF3R, ITGB2, ITGAM, FCGR3	286	17	13588	13.9737	0.433896	0.0428235	0.605335
GOTERM_BP_FAT	GO:0016477~cell migration	15	2.82486	0.000551054	SELP, EDN3, C5AR1, S100A9, ITGA11, CSPG4, ITGB2, ENPEP, ITGA4, ITGAM, TGFB1, FCGR3, WNT2, CSF3R, SELPLG	286	240	13588	2.96941	0.577953	0.0597571	0.916324
GOTERM_BP_FAT	GO:0048870~cell motility	15	2.82486	0.00272585	SELP, EDN3, C5AR1, S100A9, ITGA11, CSPG4, ITGB2, ENPEP, ITGA4, ITGAM, TGFB1, FCGR3, WNT2, CSF3R, SELPLG	286	284	13588	2.50936	0.986043	0.176484	4.45621
GOTERM_BP_FAT	GO:0051674~localization of cell	15	2.82486	0.00272585	SELP, EDN3, C5AR1, S100A9, ITGA11, CSPG4, ITGB2, ENPEP, ITGA4, ITGAM, TGFB1, FCGR3, WNT2, CSF3R, SELPLG	286	284	13588	2.50936	0.986043	0.176484	4.45621
GOTERM_BP_FAT	GO:0007626~locomotory behavior	13	2.44821	0.00464074	DOCK2, C5AR1, S100A8, CXCL13, S100A9, CCL9, CSF3R, CMTM7, CXCR2, ITGB2, ITGAM, FCGR3, CCL6	286	239	13588	2.58425	0.999311	0.27131	7.47429
GOTERM_BP_FAT	GO:0006928~cell motion	15	2.82486	0.0230586	SELP, EDN3, C5AR1, S100A9, ITGA11, CSPG4, ITGB2, ENPEP, ITGA4, ITGAM, TGFB1, FCGR3, WNT2, CSF3R, SELPLG	286	367	13588	1.94185	1	0.580742	32.2674
GOTERM_BP_FAT	GO:0007610~behavior	15	2.82486	0.0469016	C5AR1, S100A8, S100A9, CCL9, CXCR2, ITGB2, DDO, ITGAM, CCL6, FCGR3, DOCK2, CXCL13, GRM7, CMTM7, CSF3R	286	405	13588	1.75965	1	0.732575	55.1681
Annotation Cluster 5	Enrichment Score: 3.078083571693427
Category	Term	Count	%	PValue	Genes	List Total	Pop Hits	Pop Total	Fold Enrichment	Bonferroni	Benjamini	FDR
GOTERM_BP_FAT	GO:0042098~T cell proliferation	7	1.31827	2.06298e-05	ITGAL, SLC11A1, DOCK2, IL23A, CRIP3, ITGB2, ITGAM	286	28	13588	11.8776	0.0317704	0.0107043	0.0344475
GOTERM_BP_FAT	GO:0032943~mononuclear cell proliferation	8	1.50659	2.79922e-05	ITGAL, SLC11A1, DOCK2, IL23A, CRIP3, ITGB2, TGFB1, ITGAM	286	43	13588	8.83916	0.0428627	0.00727481	0.0467384
GOTERM_BP_FAT	GO:0070661~leukocyte proliferation	8	1.50659	2.79922e-05	ITGAL, SLC11A1, DOCK2, IL23A, CRIP3, ITGB2, TGFB1, ITGAM	286	43	13588	8.83916	0.0428627	0.00727481	0.0467384
GOTERM_BP_FAT	GO:0046651~lymphocyte proliferation	7	1.31827	0.000224532	ITGAL, SLC11A1, DOCK2, IL23A, CRIP3, ITGB2, ITGAM	286	42	13588	7.91841	0.29632	0.0345328	0.374321
GOTERM_BP_FAT	GO:0042110~T cell activation	10	1.88324	0.00074432	ITGAL, SLC11A1, DOCK2, IL23A, NLRC3, CRIP3, ITGB2, NHEJ1, TGFB1, ITGAM	286	116	13588	4.09573	0.688169	0.070242	1.23582
GOTERM_BP_FAT	GO:0001775~cell activation	14	2.63653	0.00209874	ITGAL, CRIP3, MYO1F, ITGB2, ITGAM, TGFB1, FCGR3, SLC11A1, VWF, DOCK2, IL23A, NLRC3, FCGR2B, NHEJ1	286	246	13588	2.70385	0.962671	0.151597	3.44787
GOTERM_BP_FAT	GO:0045321~leukocyte activation	13	2.44821	0.00228336	ITGAL, CRIP3, MYO1F, ITGB2, ITGAM, TGFB1, FCGR3, SLC11A1, DOCK2, IL23A, NLRC3, FCGR2B, NHEJ1	286	219	13588	2.82026	0.972056	0.156638	3.74576
GOTERM_BP_FAT	GO:0050798~activated T cell proliferation	3	0.564972	0.00858701	ITGAL, ITGB2, ITGAM	286	7	13588	20.3616	0.999999	0.344116	13.4136
GOTERM_BP_FAT	GO:0046649~lymphocyte activation	10	1.88324	0.0194842	ITGAL, SLC11A1, DOCK2, IL23A, NLRC3, CRIP3, ITGB2, NHEJ1, TGFB1, ITGAM	286	191	13588	2.48746	1	0.536915	28.0076
GOTERM_BP_FAT	GO:0008283~cell proliferation	10	1.88324	0.0764712	ITGAL, SLC11A1, DOCK2, IL23A, CRIP3, CSPG4, ITGB2, ENPEP, TGFB1, ITGAM	286	247	13588	1.9235	1	0.84405	73.5149
Annotation Cluster 6	Enrichment Score: 2.9706889976887876
Category	Term	Count	%	PValue	Genes	List Total	Pop Hits	Pop Total	Fold Enrichment	Bonferroni	Benjamini	FDR
GOTERM_BP_FAT	GO:0007155~cell adhesion	26	4.89642	0.000327515	ITGAL, SIGLECE, PCDH20, ITGA11, ITGA10, ITGB2, ITGB3, ITGAM, ANXA9, COL6A6, COL27A1, CSF3R, COL11A1, SELPLG, FN1, SELP, SELL, ICAM2, COL15A1, HSPG2, CLDN22, VEZT, ITGA4, VWF, PGM5, SELE	286	561	13588	2.20191	0.40109	0.0455348	0.545566
GOTERM_BP_FAT	GO:0022610~biological adhesion	26	4.89642	0.000334084	ITGAL, SIGLECE, PCDH20, ITGA11, ITGA10, ITGB2, ITGB3, ITGAM, ANXA9, COL6A6, COL27A1, CSF3R, COL11A1, SELPLG, FN1, SELP, SELL, ICAM2, COL15A1, HSPG2, CLDN22, VEZT, ITGA4, VWF, PGM5, SELE	286	562	13588	2.19799	0.407218	0.0426415	0.556479
GOTERM_BP_FAT	GO:0016337~cell-cell adhesion	12	2.25989	0.0111904	ITGAL, SELP, ANXA9, PCDH20, ICAM2, CLDN22, VEZT, ITGB2, ITGA4, SELPLG, COL11A1, ITGAM	286	236	13588	2.41579	1	0.386893	17.1336
